# Supplementary material for: Opioid Use Disorder and Alternative mRNA Splicing in Reward Circuitry
Source: Genes (Basel). 2022 Jun 10;13(6):1045. doi: 10.3390/genes13061045 (PMC9222793; doi:10.3390/genes13061045)
Supplement: Supplementary file 1 [file genes-13-01045-s001.zip › Supplementary Files S1-S3.xlsx]

## Sheet: Legend
Supplementary File Legend
Supplementary File S1	Differentially Spliced Genes Associated with OUD in dlPFC, NAC and Midbrain
Supplementary File S2	Functionally Characterized Differentially Spliced Genes linked to OUD
Supplementary File S3	Differentially Expressed Genes Associated with OUD in dlPFC, NAC and Midbrain

## Sheet: Supplementary File S1
Brain_Region	Gene	Cluster	Coordinates	loglr	df	p	p.adjust	deltapsi
dlPFC	UBR4	chr1:clu_19101_NA	chr1:19423144-19426091	10.7701	2	2.10195e-05	0.0152672	0.0369634
dlPFC	UBR4	chr1:clu_19101_NA	chr1:19423144-19426091	10.7701	2	2.10195e-05	0.0152672	-0.0374373
dlPFC	EMC1	chr1:clu_19121_NA	chr1:19557457-19559118	10.0992	2	4.11112e-05	0.0224842	0.0306403
dlPFC	EMC1	chr1:clu_19121_NA	chr1:19557457-19559118	10.0992	2	4.11112e-05	0.0224842	-0.0295128
dlPFC	PINK1	chr1:clu_19155_NA	chr1:20960428-20966385	7.58531	2	0.000507858	0.0767599	0.0426747
dlPFC	PINK1	chr1:clu_19155_NA	chr1:20960428-20966385	7.58531	2	0.000507858	0.0767599	-0.0428319
dlPFC	EPB41	chr1:clu_19412_NA	chr1:29379824-29391494	16.1115	7	3.6926e-05	0.0219441	0.0459557
dlPFC	EPB41	chr1:clu_19412_NA	chr1:29379824-29391494	16.1115	7	3.6926e-05	0.0219441	-0.0653193
dlPFC	EPB41	chr1:clu_19412_NA	chr1:29379824-29391494	16.1115	7	3.6926e-05	0.0219441	0.0301859
dlPFC	IL12RB2	chr1:clu_20328_NA	chr1:67794067-67796343	7.70706	2	0.000449643	0.0699837	0.0556125
dlPFC	IL12RB2	chr1:clu_20328_NA	chr1:67794067-67796343	7.70706	2	0.000449643	0.0699837	-0.0511341
dlPFC	FPGT,FPGT-TNNI3K,TNNI3K	chr1:clu_20381_NA	chr1:74667094-74701786	13.9236	6	0.000100396	0.0320142	-0.0642361
dlPFC	FPGT,FPGT-TNNI3K,TNNI3K	chr1:clu_20381_NA	chr1:74667094-74701786	13.9236	6	0.000100396	0.0320142	0.0439958
dlPFC	FPGT,FPGT-TNNI3K,TNNI3K	chr1:clu_20381_NA	chr1:74667094-74701786	13.9236	6	0.000100396	0.0320142	-0.084137
dlPFC	FPGT,FPGT-TNNI3K,TNNI3K	chr1:clu_20381_NA	chr1:74667094-74701786	13.9236	6	0.000100396	0.0320142	0.0955242
dlPFC	FUBP1	chr1:clu_20459_NA	chr1:78433887-78435609	11.2499	2	1.30083e-05	0.0125978	0.0551806
dlPFC	FUBP1	chr1:clu_20459_NA	chr1:78433887-78435609	11.2499	2	1.30083e-05	0.0125978	-0.140587
dlPFC	FUBP1	chr1:clu_20459_NA	chr1:78433887-78435609	11.2499	2	1.30083e-05	0.0125978	0.0854061
dlPFC	IFI44L	chr1:clu_20462_NA	chr1:79086256-79101022	18.4718	6	1.80597e-06	0.00412821	-0.0587922
dlPFC	IFI44L	chr1:clu_20462_NA	chr1:79086256-79101022	18.4718	6	1.80597e-06	0.00412821	0.19077
dlPFC	IFI44L	chr1:clu_20462_NA	chr1:79086256-79101022	18.4718	6	1.80597e-06	0.00412821	-0.142041
dlPFC	IFI44L	chr1:clu_20462_NA	chr1:79086256-79101022	18.4718	6	1.80597e-06	0.00412821	-0.0353462
dlPFC	PLEKHO1	chr1:clu_21262_NA	chr1:150123248-150131014	12.3665	4	5.69247e-05	0.024506	-0.0429549
dlPFC	APH1A	chr1:clu_21269_NA	chr1:150240391-150241098	6.55293	1	0.000294373	0.0565975	0.0338058
dlPFC	APH1A	chr1:clu_21269_NA	chr1:150240391-150241098	6.55293	1	0.000294373	0.0565975	-0.0338058
dlPFC	PI4KB	chr1:clu_21354_NA	chr1:151278839-151299747	15.3872	10	0.00063922	0.0873739	0.0266598
dlPFC	PI4KB	chr1:clu_21354_NA	chr1:151278839-151299747	15.3872	10	0.00063922	0.0873739	-0.0284689
dlPFC	TOR1AIP1	chr1:clu_22031_NA	chr1:179853904-179873101	12.5789	7	0.000711456	0.0890103	-0.0834162
dlPFC	TOR1AIP1	chr1:clu_22031_NA	chr1:179853904-179873101	12.5789	7	0.000711456	0.0890103	0.0658922
dlPFC	TOR1AIP1	chr1:clu_22031_NA	chr1:179853904-179873101	12.5789	7	0.000711456	0.0890103	0.0296698
dlPFC	GUK1	chr1:clu_22710_NA	chr1:228297200-228333212	21.177	11	1.40639e-05	0.0131337	0.0576122
dlPFC	GUK1	chr1:clu_22710_NA	chr1:228297200-228333212	21.177	11	1.40639e-05	0.0131337	-0.0731275
dlPFC	PFKFB3,RP11-563J2.2	chr10:clu_27920_NA	chr10:6266176-6368509	17.8999	10	9.11079e-05	0.0309388	0.0505198
dlPFC	PFKFB3,RP11-563J2.2	chr10:clu_27920_NA	chr10:6266176-6368509	17.8999	10	9.11079e-05	0.0309388	-0.0466486
dlPFC	PFKFB3,RP11-563J2.2	chr10:clu_27920_NA	chr10:6266176-6368509	17.8999	10	9.11079e-05	0.0309388	0.08388
dlPFC	PFKFB3,RP11-563J2.2	chr10:clu_27920_NA	chr10:6266176-6368509	17.8999	10	9.11079e-05	0.0309388	-0.0432363
dlPFC	PFKFB3,RP11-563J2.2	chr10:clu_27920_NA	chr10:6266176-6368509	17.8999	10	9.11079e-05	0.0309388	-0.0441312
dlPFC	VPS26A	chr10:clu_28648_NA	chr10:70892803-70916763	10.9953	2	1.67803e-05	0.014499	0.0325068
dlPFC	VPS26A	chr10:clu_28648_NA	chr10:70892803-70916763	10.9953	2	1.67803e-05	0.014499	0.0599923
dlPFC	VPS26A	chr10:clu_28648_NA	chr10:70892803-70916763	10.9953	2	1.67803e-05	0.014499	-0.0924991
dlPFC	CAMK2G	chr10:clu_28782_NA	chr10:75597269-75601927	17.124	2	3.65718e-08	0.00047814	0.0846247
dlPFC	CAMK2G	chr10:clu_28782_NA	chr10:75597269-75601927	17.124	2	3.65718e-08	0.00047814	-0.122837
dlPFC	CAMK2G	chr10:clu_28782_NA	chr10:75597269-75601927	17.124	2	3.65718e-08	0.00047814	0.0382122
dlPFC	COX15	chr10:clu_29187_NA	chr10:101476218-101480744	10.6339	2	2.40862e-05	0.0165738	0.0679775
dlPFC	COX15	chr10:clu_29187_NA	chr10:101476218-101480744	10.6339	2	2.40862e-05	0.0165738	-0.0802914
dlPFC	STK32C	chr10:clu_29721_NA	chr10:134022605-134036145	7.25178	2	0.000708908	0.0890103	0.068178
dlPFC	STK32C	chr10:clu_29721_NA	chr10:134022605-134036145	7.25178	2	0.000708908	0.0890103	-0.0471223
dlPFC	PIK3C2A	chr11:clu_44165_NA	chr11:17144360-17153463	8.30967	3	0.00084626	0.0983466	-0.0885762
dlPFC	PIK3C2A	chr11:clu_44165_NA	chr11:17144360-17153463	8.30967	3	0.00084626	0.0983466	0.0701912
dlPFC	C11orf84	chr11:clu_44784_NA	chr11:63585837-63586274	7.42428	2	0.000596593	0.0838694	0.0627367
dlPFC	C11orf84	chr11:clu_44784_NA	chr11:63585837-63586274	7.42428	2	0.000596593	0.0838694	-0.0678032
dlPFC	CREBZF	chr11:clu_45395_NA	chr11:85373501-85374568	7.34019	2	0.000648925	0.0873739	0.0636867
dlPFC	CREBZF	chr11:clu_45395_NA	chr11:85373501-85374568	7.34019	2	0.000648925	0.0873739	-0.107086
dlPFC	CREBZF	chr11:clu_45395_NA	chr11:85373501-85374568	7.34019	2	0.000648925	0.0873739	0.0433994
dlPFC	KDM5A	chr12:clu_25257_NA	chr12:463400-472129	5.57031	1	0.000844573	0.0983466	0.0970953
dlPFC	KDM5A	chr12:clu_25257_NA	chr12:463400-472129	5.57031	1	0.000844573	0.0983466	-0.0970953
dlPFC	WNK1	chr12:clu_25273_NA	chr12:971436-987381	13.8939	8	0.000516338	0.0771455	-0.0487398
dlPFC	WNK1	chr12:clu_25273_NA	chr12:971436-987381	13.8939	8	0.000516338	0.0771455	0.0511435
dlPFC	WNK1	chr12:clu_25273_NA	chr12:971436-987381	13.8939	8	0.000516338	0.0771455	0.0275962
dlPFC	WNK1	chr12:clu_25273_NA	chr12:971436-987381	13.8939	8	0.000516338	0.0771455	-0.0294694
dlPFC	PLEKHA5	chr12:clu_25636_NA	chr12:19498822-19501333	11.4917	4	0.000127595	0.0351196	-0.0561761
dlPFC	PLEKHA5	chr12:clu_25636_NA	chr12:19498822-19501333	11.4917	4	0.000127595	0.0351196	0.0337881
dlPFC	PLEKHA5	chr12:clu_25636_NA	chr12:19498822-19501333	11.4917	4	0.000127595	0.0351196	-0.0477399
dlPFC	PLEKHA5	chr12:clu_25636_NA	chr12:19498822-19501333	11.4917	4	0.000127595	0.0351196	0.0765737
dlPFC	PUS7L	chr12:clu_25932_NA	chr12:44124505-44139849	19.288	13	0.000233586	0.0492833	0.0329767
dlPFC	PUS7L	chr12:clu_25932_NA	chr12:44124505-44139849	19.288	13	0.000233586	0.0492833	-0.0333574
dlPFC	PUS7L	chr12:clu_25932_NA	chr12:44124505-44139849	19.288	13	0.000233586	0.0492833	0.0509692
dlPFC	PUS7L	chr12:clu_25932_NA	chr12:44124505-44139849	19.288	13	0.000233586	0.0492833	-0.0344401
dlPFC	ERBB3	chr12:clu_26326_NA	chr12:56487334-56487883	18.3396	2	1.08441e-08	0.000283551	0.0615578
dlPFC	ERBB3	chr12:clu_26326_NA	chr12:56487334-56487883	18.3396	2	1.08441e-08	0.000283551	-0.0789746
dlPFC	OTOGL	chr12:clu_26749_NA	chr12:80699475-80707256	7.85393	2	0.000388224	0.0646579	0.0650655
dlPFC	OTOGL	chr12:clu_26749_NA	chr12:80699475-80707256	7.85393	2	0.000388224	0.0646579	0.0781055
dlPFC	OTOGL	chr12:clu_26749_NA	chr12:80699475-80707256	7.85393	2	0.000388224	0.0646579	-0.143171
dlPFC	TMTC3	chr12:clu_26831_NA	chr12:88560359-88566429	7.3388	1	0.000127553	0.0351196	-0.0392342
dlPFC	TMTC3	chr12:clu_26831_NA	chr12:88560359-88566429	7.3388	1	0.000127553	0.0351196	0.0392342
dlPFC	USP30	chr12:clu_27162_NA	chr12:109490566-109505329	10.0811	4	0.000463883	0.0713507	0.0478537
dlPFC	USP30	chr12:clu_27162_NA	chr12:109490566-109505329	10.0811	4	0.000463883	0.0713507	-0.0455725
dlPFC	RNF10	chr12:clu_27468_NA	chr12:121004783-121013434	9.04846	2	0.000117572	0.0334334	0.0490769
dlPFC	RNF10	chr12:clu_27468_NA	chr12:121004783-121013434	9.04846	2	0.000117572	0.0334334	-0.0279117
dlPFC	NCOR2	chr12:clu_27658_NA	chr12:124922542-124934361	11.6891	2	8.38475e-06	0.0104402	-0.0266792
dlPFC	NCOR2	chr12:clu_27658_NA	chr12:124922542-124934361	11.6891	2	8.38475e-06	0.0104402	0.0352797
dlPFC	IFT88	chr13:clu_11399_NA	chr13:21230569-21245112	9.84859	4	0.00057304	0.0809937	0.0794258
dlPFC	IFT88	chr13:clu_11399_NA	chr13:21230569-21245112	9.84859	4	0.00057304	0.0809937	-0.109069
dlPFC	RFC3	chr13:clu_11573_NA	chr13:34398121-34403973	9.04821	2	0.000117601	0.0334334	0.0632187
dlPFC	RFC3	chr13:clu_11573_NA	chr13:34398121-34403973	9.04821	2	0.000117601	0.0334334	-0.071503
dlPFC	MYCBP2	chr13:clu_11955_NA	chr13:77670616-77695508	14.1354	8	0.000425388	0.0682396	-0.0290673
dlPFC	MYCBP2	chr13:clu_11955_NA	chr13:77670616-77695508	14.1354	8	0.000425388	0.0682396	0.0394403
dlPFC	ATP11A	chr13:clu_12242_NA	chr13:113496693-113508593	8.86654	2	0.00014103	0.0368943	0.0528337
dlPFC	ATP11A	chr13:clu_12242_NA	chr13:113496693-113508593	8.86654	2	0.00014103	0.0368943	-0.0689608
dlPFC	RPS6KL1	chr14:clu_1030_NA	chr14:75388264-75389883	11.5169	6	0.000785258	0.0933315	0.105974
dlPFC	RPS6KL1	chr14:clu_1030_NA	chr14:75388264-75389883	11.5169	6	0.000785258	0.0933315	-0.0862653
dlPFC	AHSA1	chr14:clu_1110_NA	chr14:77924325-77925959	7.74206	2	0.000434177	0.0688051	0.029584
dlPFC	AHSA1	chr14:clu_1110_NA	chr14:77924325-77925959	7.74206	2	0.000434177	0.0688051	-0.0297955
dlPFC	BCL2L2,BCL2L2-PABPN1	chr14:clu_115_NA	chr14:23776103-23776401	8.01512	2	0.000330429	0.0595867	0.0729722
dlPFC	BCL2L2,BCL2L2-PABPN1	chr14:clu_115_NA	chr14:23776103-23776401	8.01512	2	0.000330429	0.0595867	-0.0338299
dlPFC	BCL2L2,BCL2L2-PABPN1	chr14:clu_115_NA	chr14:23776103-23776401	8.01512	2	0.000330429	0.0595867	-0.0391423
dlPFC	MEG3	chr14:clu_1413_NA	chr14:101296086-101297758	12.3885	3	1.71894e-05	0.014499	0.0338702
dlPFC	MEG3	chr14:clu_1413_NA	chr14:101296086-101297758	12.3885	3	1.71894e-05	0.014499	-0.0295968
dlPFC	EIF5	chr14:clu_1478_NA	chr14:103800597-103802129	14.3864	7	0.000159157	0.0396346	0.0258411
dlPFC	EIF5	chr14:clu_1478_NA	chr14:103800597-103802129	14.3864	7	0.000159157	0.0396346	-0.0328941
dlPFC	PACS2	chr14:clu_1566_NA	chr14:105848383-105848814	8.26197	1	4.80397e-05	0.0235554	-0.096791
dlPFC	PACS2	chr14:clu_1566_NA	chr14:105848383-105848814	8.26197	1	4.80397e-05	0.0235554	0.096791
dlPFC	MDGA2	chr14:clu_432_NA	chr14:47324357-47343248	7.9429	2	0.000355174	0.0610992	-0.0301442
dlPFC	TMEM260	chr14:clu_641_NA	chr14:57052630-57072288	10.7095	5	0.000674892	0.0881717	0.0571354
dlPFC	TMEM260	chr14:clu_641_NA	chr14:57052630-57072288	10.7095	5	0.000674892	0.0881717	-0.0745247
dlPFC	PCNX4	chr14:clu_722_NA	chr14:60581597-60582437	8.59712	3	0.000644615	0.0873739	0.0267885
dlPFC	PCNX4	chr14:clu_722_NA	chr14:60581597-60582437	8.59712	3	0.000644615	0.0873739	-0.0328361
dlPFC	PLEKHH1	chr14:clu_828_NA	chr14:68046593-68047655	7.72639	2	0.000441033	0.0690547	0.0491653
dlPFC	PLEKHH1	chr14:clu_828_NA	chr14:68046593-68047655	7.72639	2	0.000441033	0.0690547	-0.0887004
dlPFC	PLEKHH1	chr14:clu_828_NA	chr14:68046593-68047655	7.72639	2	0.000441033	0.0690547	0.0395351
dlPFC	TYRO3	chr15:clu_10056_NA	chr15:41857339-41860415	10.5737	3	9.81093e-05	0.0320142	-0.0303453
dlPFC	MAPKBP1	chr15:clu_10065_NA	chr15:42067587-42103081	10.734	2	2.17906e-05	0.0153995	-0.108567
dlPFC	MAPKBP1	chr15:clu_10065_NA	chr15:42067587-42103081	10.734	2	2.17906e-05	0.0153995	0.108336
dlPFC	SNAP23	chr15:clu_10114_NA	chr15:42807552-42837334	12.2047	5	0.0001811	0.0423676	-0.0254018
dlPFC	MYEF2	chr15:clu_10253_NA	chr15:48441568-48443670	8.36142	2	0.000233713	0.0492833	0.0779459
dlPFC	MYEF2	chr15:clu_10253_NA	chr15:48441568-48443670	8.36142	2	0.000233713	0.0492833	-0.105408
dlPFC	MYEF2	chr15:clu_10253_NA	chr15:48441568-48443670	8.36142	2	0.000233713	0.0492833	0.0274618
dlPFC	RPLP1	chr15:clu_10747_NA	chr15:69745359-69747509	8.31099	2	0.000245799	0.0510092	0.035295
dlPFC	RPLP1	chr15:clu_10747_NA	chr15:69745359-69747509	8.31099	2	0.000245799	0.0510092	-0.0377429
dlPFC	VPS33B	chr15:clu_11229_NA	chr15:91548349-91548610	5.73473	1	0.000707493	0.0890103	-0.0543699
dlPFC	VPS33B	chr15:clu_11229_NA	chr15:91548349-91548610	5.73473	1	0.000707493	0.0890103	0.0543699
dlPFC	SNHG14	chr15:clu_9720_NA	chr15:25304865-25307097	7.20718	2	0.000741245	0.0913483	-0.0977645
dlPFC	SNHG14	chr15:clu_9720_NA	chr15:25304865-25307097	7.20718	2	0.000741245	0.0913483	0.149815
dlPFC	SNHG14	chr15:clu_9720_NA	chr15:25304865-25307097	7.20718	2	0.000741245	0.0913483	-0.0520505
dlPFC	SNHG14	chr15:clu_9762_NA	chr15:25497480-25511578	25.1223	16	2.09554e-05	0.0152672	-0.0364867
dlPFC	SNHG14	chr15:clu_9762_NA	chr15:25497480-25511578	25.1223	16	2.09554e-05	0.0152672	0.14659
dlPFC	RYR3	chr15:clu_9903_NA	chr15:34048574-34061313	11.6418	5	0.000297915	0.0568391	-0.0630172
dlPFC	RYR3	chr15:clu_9903_NA	chr15:34048574-34061313	11.6418	5	0.000297915	0.0568391	0.0419312
dlPFC	RYR3	chr15:clu_9903_NA	chr15:34048574-34061313	11.6418	5	0.000297915	0.0568391	-0.0604502
dlPFC	RYR3	chr15:clu_9903_NA	chr15:34048574-34061313	11.6418	5	0.000297915	0.0568391	0.0806926
dlPFC	RYR3	chr15:clu_9910_NA	chr15:34134236-34137063	10.956	3	6.80406e-05	0.0263117	-0.0984936
dlPFC	RYR3	chr15:clu_9910_NA	chr15:34134236-34137063	10.956	3	6.80406e-05	0.0263117	0.224923
dlPFC	RYR3	chr15:clu_9910_NA	chr15:34134236-34137063	10.956	3	6.80406e-05	0.0263117	-0.128366
dlPFC	METTL26	chr16:clu_29841_NA	chr16:684797-686094	20.8143	13	7.5303e-05	0.0278835	0.0527367
dlPFC	SRRM2	chr16:clu_30022_NA	chr16:2802847-2807473	15.4309	3	9.08989e-07	0.00297103	0.0340955
dlPFC	SRRM2	chr16:clu_30022_NA	chr16:2802847-2807473	15.4309	3	9.08989e-07	0.00297103	-0.0285037
dlPFC	TMEM219,TAOK2	chr16:clu_30612_NA	chr16:29982899-29989059	9.86097	4	0.000566637	0.0809937	-0.0948532
dlPFC	TMEM219,TAOK2	chr16:clu_30612_NA	chr16:29982899-29989059	9.86097	4	0.000566637	0.0809937	0.105305
dlPFC	BRD7	chr16:clu_30786_NA	chr16:50355949-50359659	7.25101	2	0.000709455	0.0890103	-0.0693749
dlPFC	BRD7	chr16:clu_30786_NA	chr16:50355949-50359659	7.25101	2	0.000709455	0.0890103	0.0601823
dlPFC	ZFP1	chr16:clu_31296_NA	chr16:75182541-75186807	9.26831	3	0.000340841	0.0602183	0.0514187
dlPFC	ZFP1	chr16:clu_31296_NA	chr16:75182541-75186807	9.26831	3	0.000340841	0.0602183	-0.0370634
dlPFC	MINK1	chr17:clu_1782_NA	chr17:4794030-4795444	11.8104	4	9.51446e-05	0.0318326	-0.0290214
dlPFC	MINK1	chr17:clu_1782_NA	chr17:4794030-4795444	11.8104	4	9.51446e-05	0.0318326	-0.0407274
dlPFC	MINK1	chr17:clu_1782_NA	chr17:4794030-4795444	11.8104	4	9.51446e-05	0.0318326	0.0596154
dlPFC	NF1	chr17:clu_2468_NA	chr17:29490394-29508440	10.9906	4	0.000202163	0.0456295	0.0322992
dlPFC	NF1	chr17:clu_2468_NA	chr17:29490394-29508440	10.9906	4	0.000202163	0.0456295	-0.0333057
dlPFC	MAPT	chr17:clu_2998_NA	chr17:44074030-44091609	13.1338	2	1.97728e-06	0.00412821	-0.0255307
dlPFC	MAPT	chr17:clu_2998_NA	chr17:44074030-44091609	13.1338	2	1.97728e-06	0.00412821	0.0792906
dlPFC	MAPT	chr17:clu_2998_NA	chr17:44074030-44091609	13.1338	2	1.97728e-06	0.00412821	-0.0537599
dlPFC	NPEPPS	chr17:clu_3042_NA	chr17:45646860-45656756	14.5901	3	2.05242e-06	0.00412821	0.064225
dlPFC	NPEPPS	chr17:clu_3042_NA	chr17:45646860-45656756	14.5901	3	2.05242e-06	0.00412821	-0.155042
dlPFC	NPEPPS	chr17:clu_3042_NA	chr17:45646860-45656756	14.5901	3	2.05242e-06	0.00412821	0.0819166
dlPFC	SPAG9	chr17:clu_3148_NA	chr17:49084687-49097520	16.8951	7	1.8854e-05	0.0147107	-0.0372505
dlPFC	COIL	chr17:clu_3209_NA	chr17:55026795-55027250	8.18483	2	0.000278853	0.0547992	-0.0255924
dlPFC	COIL	chr17:clu_3209_NA	chr17:55026795-55027250	8.18483	2	0.000278853	0.0547992	0.0380434
dlPFC	STRADA,RP11-51F16.8	chr17:clu_3399_NA	chr17:61784090-61787851	11.5058	3	4.01577e-05	0.0224842	-0.0310659
dlPFC	CYTH1	chr17:clu_3831_NA	chr17:76698322-76704279	9.1478	2	0.000106454	0.032148	-0.0303891
dlPFC	RBFOX3	chr17:clu_3857_NA	chr17:77102867-77303806	13.9335	6	9.95434e-05	0.0320142	0.133841
dlPFC	RBFOX3	chr17:clu_3857_NA	chr17:77102867-77303806	13.9335	6	9.95434e-05	0.0320142	-0.122135
dlPFC	PPP4R1	chr18:clu_12423_NA	chr18:9584764-9588087	8.1092	1	5.64435e-05	0.024506	0.0287553
dlPFC	PPP4R1	chr18:clu_12423_NA	chr18:9584764-9588087	8.1092	1	5.64435e-05	0.024506	-0.0287553
dlPFC	CEP192	chr18:clu_12494_NA	chr18:13087645-13089455	7.74624	2	0.000432364	0.0688051	0.0364943
dlPFC	CEP192	chr18:clu_12494_NA	chr18:13087645-13089455	7.74624	2	0.000432364	0.0688051	-0.0296129
dlPFC	ANKRD29	chr18:clu_12579_NA	chr18:21181273-21209821	17.2316	12	0.000569884	0.0809937	-0.111606
dlPFC	ANKRD29	chr18:clu_12579_NA	chr18:21181273-21209821	17.2316	12	0.000569884	0.0809937	0.100968
dlPFC	ANKRD29	chr18:clu_12579_NA	chr18:21181273-21209821	17.2316	12	0.000569884	0.0809937	0.0321062
dlPFC	CTD-2369P2.10,FDX2,CTD-2369P2.12	chr19:clu_23541_NA	chr19:10421616-10426381	10.5945	3	9.61747e-05	0.0318326	-0.122392
dlPFC	CTD-2369P2.10,FDX2,CTD-2369P2.12	chr19:clu_23541_NA	chr19:10421616-10426381	10.5945	3	9.61747e-05	0.0318326	0.113753
dlPFC	FCHO1	chr19:clu_23893_NA	chr19:17858623-17873571	7.29279	2	0.000680427	0.0881717	0.151604
dlPFC	FCHO1	chr19:clu_23893_NA	chr19:17858623-17873571	7.29279	2	0.000680427	0.0881717	-0.165423
dlPFC	COPE	chr19:clu_23957_NA	chr19:19011258-19015580	8.19452	2	0.000276163	0.0547054	0.0727012
dlPFC	COPE	chr19:clu_23957_NA	chr19:19011258-19015580	8.19452	2	0.000276163	0.0547054	-0.0864142
dlPFC	APLP1	chr19:clu_24256_NA	chr19:36364615-36365643	14.7858	2	3.78984e-07	0.00247742	-0.113422
dlPFC	APLP1	chr19:clu_24256_NA	chr19:36364615-36365643	14.7858	2	3.78984e-07	0.00247742	0.123191
dlPFC	ZNF566	chr19:clu_24282_NA	chr19:36940903-36980388	18.2937	11	0.000135077	0.0364123	0.0537324
dlPFC	ZNF566	chr19:clu_24282_NA	chr19:36940903-36980388	18.2937	11	0.000135077	0.0364123	0.0293424
dlPFC	ZNF566	chr19:clu_24282_NA	chr19:36940903-36980388	18.2937	11	0.000135077	0.0364123	-0.110745
dlPFC	CTD-2528L19.4,ZNF607	chr19:clu_24343_NA	chr19:38190796-38202511	13.0973	6	0.000204799	0.0456295	0.026071
dlPFC	CTD-2528L19.4,ZNF607	chr19:clu_24343_NA	chr19:38190796-38202511	13.0973	6	0.000204799	0.0456295	-0.0381216
dlPFC	GRIK5	chr19:clu_24517_NA	chr19:42510962-42546704	12.8523	5	0.000101807	0.0320508	-0.0619379
dlPFC	GRIK5	chr19:clu_24517_NA	chr19:42510962-42546704	12.8523	5	0.000101807	0.0320508	0.0322462
dlPFC	GRIK5	chr19:clu_24517_NA	chr19:42510962-42546704	12.8523	5	0.000101807	0.0320508	-0.0561623
dlPFC	GRIK5	chr19:clu_24517_NA	chr19:42510962-42546704	12.8523	5	0.000101807	0.0320508	0.0610556
dlPFC	AP2A1	chr19:clu_24856_NA	chr19:50305398-50306206	7.19863	2	0.000747611	0.0913483	0.0932516
dlPFC	AP2A1	chr19:clu_24856_NA	chr19:50305398-50306206	7.19863	2	0.000747611	0.0913483	-0.0363971
dlPFC	AP2A1	chr19:clu_24856_NA	chr19:50305398-50306206	7.19863	2	0.000747611	0.0913483	-0.0568544
dlPFC	PPP1R12C	chr19:clu_25056_NA	chr19:55607546-55614777	12.6154	4	4.52087e-05	0.0235554	-0.0373788
dlPFC	PPP1R12C	chr19:clu_25056_NA	chr19:55607546-55614777	12.6154	4	4.52087e-05	0.0235554	0.0726153
dlPFC	SH3YL1	chr2:clu_33637_NA	chr2:234272-247538	11.2359	4	0.000161422	0.0398195	-0.0264033
dlPFC	SH3YL1	chr2:clu_33637_NA	chr2:234272-247538	11.2359	4	0.000161422	0.0398195	0.0256021
dlPFC	SH3YL1	chr2:clu_33637_NA	chr2:234272-247538	11.2359	4	0.000161422	0.0398195	0.0263683
dlPFC	BIRC6	chr2:clu_34156_NA	chr2:32698307-32703703	10.3839	3	0.000117633	0.0334334	0.0731799
dlPFC	BIRC6	chr2:clu_34156_NA	chr2:32698307-32703703	10.3839	3	0.000117633	0.0334334	-0.0530029
dlPFC	STRN	chr2:clu_34210_NA	chr2:37143294-37152248	10.1365	2	3.96079e-05	0.0224842	-0.0420523
dlPFC	STRN	chr2:clu_34210_NA	chr2:37143294-37152248	10.1365	2	3.96079e-05	0.0224842	0.0265685
dlPFC	EML6	chr2:clu_34481_NA	chr2:55098742-55118191	9.14302	2	0.000106963	0.032148	0.0375821
dlPFC	EML6	chr2:clu_34481_NA	chr2:55098742-55118191	9.14302	2	0.000106963	0.032148	0.0264994
dlPFC	EML6	chr2:clu_34481_NA	chr2:55098742-55118191	9.14302	2	0.000106963	0.032148	-0.0640815
dlPFC	BIN1	chr2:clu_35587_NA	chr2:127808488-127816587	20.4134	11	2.58122e-05	0.0168975	-0.0453997
dlPFC	BIN1	chr2:clu_35587_NA	chr2:127808488-127816587	20.4134	11	2.58122e-05	0.0168975	0.0568234
dlPFC	BIN1	chr2:clu_35587_NA	chr2:127808488-127816587	20.4134	11	2.58122e-05	0.0168975	-0.0267343
dlPFC	PLEKHB2	chr2:clu_35663_NA	chr2:131883478-131897743	15.8009	9	0.000233274	0.0492833	-0.0271154
dlPFC	CCNT2	chr2:clu_35719_NA	chr2:135677461-135694411	5.87435	1	0.000608856	0.0846828	-0.0306519
dlPFC	CCNT2	chr2:clu_35719_NA	chr2:135677461-135694411	5.87435	1	0.000608856	0.0846828	0.0306519
dlPFC	PRPF40A	chr2:clu_35879_NA	chr2:153520481-153520652	7.5408	1	0.000102963	0.0320508	-0.135175
dlPFC	PRPF40A	chr2:clu_35879_NA	chr2:153520481-153520652	7.5408	1	0.000102963	0.0320508	0.135175
dlPFC	TTC21B	chr2:clu_36049_NA	chr2:166789567-166799729	14.021	4	1.22307e-05	0.0125224	0.0332816
dlPFC	TTC21B	chr2:clu_36049_NA	chr2:166789567-166799729	14.021	4	1.22307e-05	0.0125224	-0.0517514
dlPFC	WDR75	chr2:clu_36404_NA	chr2:190334165-190334849	11.639	4	0.00011142	0.0331069	-0.0518893
dlPFC	ORMDL1	chr2:clu_36419_NA	chr2:190647328-190648995	8.81975	3	0.000521935	0.0771455	-0.11383
dlPFC	ORMDL1	chr2:clu_36419_NA	chr2:190647328-190648995	8.81975	3	0.000521935	0.0771455	0.067838
dlPFC	ORMDL1	chr2:clu_36419_NA	chr2:190647328-190648995	8.81975	3	0.000521935	0.0771455	0.0389541
dlPFC	STAT1	chr2:clu_36458_NA	chr2:191874730-191878744	12.2104	4	6.5767e-05	0.0263117	-0.054933
dlPFC	STAT1	chr2:clu_36458_NA	chr2:191874730-191878744	12.2104	4	6.5767e-05	0.0263117	0.0958989
dlPFC	ABI2	chr2:clu_36671_NA	chr2:204255866-204260382	11.6917	4	0.000106144	0.032148	-0.0367836
dlPFC	ABI2	chr2:clu_36671_NA	chr2:204255866-204260382	11.6917	4	0.000106144	0.032148	0.0439916
dlPFC	ABI2	chr2:clu_36671_NA	chr2:204255866-204260382	11.6917	4	0.000106144	0.032148	0.0321158
dlPFC	ABI2	chr2:clu_36671_NA	chr2:204255866-204260382	11.6917	4	0.000106144	0.032148	-0.0347523
dlPFC	RAPH1	chr2:clu_36674_NA	chr2:204326648-204354307	12.4797	5	0.000141874	0.0368943	0.0492866
dlPFC	RAPH1	chr2:clu_36674_NA	chr2:204326648-204354307	12.4797	5	0.000141874	0.0368943	-0.0584694
dlPFC	RAPH1	chr2:clu_36674_NA	chr2:204326648-204354307	12.4797	5	0.000141874	0.0368943	0.0438842
dlPFC	RAPH1	chr2:clu_36674_NA	chr2:204326648-204354307	12.4797	5	0.000141874	0.0368943	-0.0466588
dlPFC	DOCK10	chr2:clu_37042_NA	chr2:225684246-225695258	9.65278	2	6.42466e-05	0.0262487	-0.113149
dlPFC	DOCK10	chr2:clu_37042_NA	chr2:225684246-225695258	9.65278	2	6.42466e-05	0.0262487	0.100726
dlPFC	ITM2C	chr2:clu_37119_NA	chr2:231729499-231740395	19.5527	5	2.26154e-07	0.00197115	0.0800524
dlPFC	ITM2C	chr2:clu_37119_NA	chr2:231729499-231740395	19.5527	5	2.26154e-07	0.00197115	-0.0802915
dlPFC	MTERF4	chr2:clu_37296_NA	chr2:242029459-242041668	23.3931	17	0.000131346	0.0357754	-0.0422807
dlPFC	MTERF4	chr2:clu_37296_NA	chr2:242029459-242041668	23.3931	17	0.000131346	0.0357754	0.0261644
dlPFC	MTERF4	chr2:clu_37296_NA	chr2:242029459-242041668	23.3931	17	0.000131346	0.0357754	0.0381756
dlPFC	MTERF4	chr2:clu_37296_NA	chr2:242029459-242041668	23.3931	17	0.000131346	0.0357754	-0.025413
dlPFC	STK25	chr2:clu_37325_NA	chr2:242441123-242448638	12.6488	4	4.38324e-05	0.0233904	-0.0445533
dlPFC	STK25	chr2:clu_37325_NA	chr2:242441123-242448638	12.6488	4	4.38324e-05	0.0233904	-0.030869
dlPFC	STK25	chr2:clu_37325_NA	chr2:242441123-242448638	12.6488	4	4.38324e-05	0.0233904	0.0622254
dlPFC	EDEM2	chr20:clu_37830_NA	chr20:33714178-33730176	14.949	9	0.000456586	0.0706438	-0.0389554
dlPFC	EDEM2	chr20:clu_37830_NA	chr20:33714178-33730176	14.949	9	0.000456586	0.0706438	-0.0662994
dlPFC	EDEM2	chr20:clu_37830_NA	chr20:33714178-33730176	14.949	9	0.000456586	0.0706438	-0.0753902
dlPFC	EDEM2	chr20:clu_37830_NA	chr20:33714178-33730176	14.949	9	0.000456586	0.0706438	0.204002
dlPFC	YTHDF1	chr20:clu_38343_NA	chr20:61828086-61845216	11.2704	3	5.03358e-05	0.0239306	-0.0444693
dlPFC	NA	chr20:clu_38359_NA	chr20:62033146-62033612	18.407	8	1.24515e-05	0.0125224	0.0273518
dlPFC	NA	chr20:clu_38359_NA	chr20:62033146-62033612	18.407	8	1.24515e-05	0.0125224	-0.0642526
dlPFC	NA	chr20:clu_38359_NA	chr20:62033146-62033612	18.407	8	1.24515e-05	0.0125224	-0.122306
dlPFC	NA	chr20:clu_38359_NA	chr20:62033146-62033612	18.407	8	1.24515e-05	0.0125224	-0.141481
dlPFC	NA	chr20:clu_38359_NA	chr20:62033146-62033612	18.407	8	1.24515e-05	0.0125224	0.327931
dlPFC	NA	chr20:clu_38359_NA	chr20:62033146-62033612	18.407	8	1.24515e-05	0.0125224	-0.0574116
dlPFC	DGCR6L	chr22:clu_17736_NA	chr22:20302999-20307162	8.79957	3	0.000532028	0.0778618	-0.0644874
dlPFC	DGCR6L	chr22:clu_17736_NA	chr22:20302999-20307162	8.79957	3	0.000532028	0.0778618	0.0808673
dlPFC	POLR2F	chr22:clu_18181_NA	chr22:38363177-38437075	15.3901	10	0.000637818	0.0873739	-0.0384765
dlPFC	POLR2F	chr22:clu_18181_NA	chr22:38363177-38437075	15.3901	10	0.000637818	0.0873739	-0.0358443
dlPFC	POLR2F	chr22:clu_18181_NA	chr22:38363177-38437075	15.3901	10	0.000637818	0.0873739	0.0463713
dlPFC	SETD5	chr3:clu_40927_NA	chr3:9477590-9482140	13.5958	4	1.81825e-05	0.0147107	-0.0374356
dlPFC	SETD5	chr3:clu_40927_NA	chr3:9477590-9482140	13.5958	4	1.81825e-05	0.0147107	0.0276159
dlPFC	CAPN7	chr3:clu_41100_NA	chr3:15283760-15288239	12.2413	2	4.82683e-06	0.00742424	-0.124773
dlPFC	CAPN7	chr3:clu_41100_NA	chr3:15283760-15288239	12.2413	2	4.82683e-06	0.00742424	0.164538
dlPFC	CAPN7	chr3:clu_41100_NA	chr3:15283760-15288239	12.2413	2	4.82683e-06	0.00742424	-0.0397642
dlPFC	RBM5	chr3:clu_41771_NA	chr3:50140599-50142510	7.82041	2	0.000401456	0.0660205	0.0457912
dlPFC	RBM5	chr3:clu_41771_NA	chr3:50140599-50142510	7.82041	2	0.000401456	0.0660205	-0.0257891
dlPFC	NISCH	chr3:clu_41898_NA	chr3:52514311-52518529	9.52155	4	0.000770765	0.0924494	0.0542242
dlPFC	NISCH	chr3:clu_41898_NA	chr3:52514311-52518529	9.52155	4	0.000770765	0.0924494	-0.0507739
dlPFC	ARHGEF3	chr3:clu_42018_NA	chr3:56807844-56916320	11.2701	4	0.000156429	0.0393298	-0.0333518
dlPFC	ARHGEF3	chr3:clu_42018_NA	chr3:56807844-56916320	11.2701	4	0.000156429	0.0393298	0.0457646
dlPFC	FAM19A1	chr3:clu_42153_NA	chr3:68466570-68593637	10.3839	4	0.000352053	0.0610992	-0.0756936
dlPFC	FAM19A1	chr3:clu_42153_NA	chr3:68466570-68593637	10.3839	4	0.000352053	0.0610992	0.0626648
dlPFC	MFSD1	chr3:clu_43176_NA	chr3:158539442-158541217	8.63859	2	0.000177137	0.0423128	0.0528753
dlPFC	MFSD1	chr3:clu_43176_NA	chr3:158539442-158541217	8.63859	2	0.000177137	0.0423128	-0.0597225
dlPFC	OPA1	chr3:clu_43629_NA	chr3:193336725-193349401	8.79174	3	0.000535992	0.0778618	0.0561684
dlPFC	OPA1	chr3:clu_43629_NA	chr3:193336725-193349401	8.79174	3	0.000535992	0.0778618	-0.036612
dlPFC	ZNF718,ZNF595	chr4:clu_4061_NA	chr4:53385-194870	14.3086	8	0.000370051	0.0622736	0.0495073
dlPFC	ZNF718,ZNF595	chr4:clu_4061_NA	chr4:53385-194870	14.3086	8	0.000370051	0.0622736	-0.0805893
dlPFC	ZNF718,ZNF595	chr4:clu_4061_NA	chr4:53385-194870	14.3086	8	0.000370051	0.0622736	0.0730535
dlPFC	ZNF718,ZNF595	chr4:clu_4061_NA	chr4:53385-194870	14.3086	8	0.000370051	0.0622736	-0.0503289
dlPFC	PDS5A	chr4:clu_4575_NA	chr4:39827108-39843568	13.2	5	7.4626e-05	0.0278835	-0.0334878
dlPFC	PDS5A	chr4:clu_4575_NA	chr4:39827108-39843568	13.2	5	7.4626e-05	0.0278835	0.0348389
dlPFC	USO1	chr4:clu_4876_NA	chr4:76678726-76691592	10.9038	5	0.000569566	0.0809937	0.0539844
dlPFC	USO1	chr4:clu_4876_NA	chr4:76678726-76691592	10.9038	5	0.000569566	0.0809937	-0.112364
dlPFC	USO1	chr4:clu_4876_NA	chr4:76678726-76691592	10.9038	5	0.000569566	0.0809937	0.0489338
dlPFC	HNRNPD	chr4:clu_4962_NA	chr4:83276554-83277949	9.65677	2	6.39906e-05	0.0262487	0.0722842
dlPFC	HNRNPD	chr4:clu_4962_NA	chr4:83276554-83277949	9.65677	2	6.39906e-05	0.0262487	-0.0494436
dlPFC	NAF1	chr4:clu_5806_NA	chr4:164061535-164069493	10.1276	3	0.000150271	0.0385224	-0.0450926
dlPFC	NAF1	chr4:clu_5806_NA	chr4:164061535-164069493	10.1276	3	0.000150271	0.0385224	0.0419562
dlPFC	PARP8	chr5:clu_13531_NA	chr5:50118234-50122589	11.3755	2	1.14729e-05	0.0125224	-0.0699735
dlPFC	PARP8	chr5:clu_13531_NA	chr5:50118234-50122589	11.3755	2	1.14729e-05	0.0125224	0.0506188
dlPFC	BTF3	chr5:clu_13795_NA	chr5:72794383-72794959	6.85606	1	0.000213076	0.0464292	-0.0414542
dlPFC	BTF3	chr5:clu_13795_NA	chr5:72794383-72794959	6.85606	1	0.000213076	0.0464292	0.0414542
dlPFC	PAPD4	chr5:clu_13907_NA	chr5:78975493-78977805	9.41273	2	8.16775e-05	0.0292562	0.0264084
dlPFC	PPIP5K2	chr5:clu_14209_NA	chr5:102520445-102526543	15.6167	7	5.63041e-05	0.024506	0.112463
dlPFC	PPIP5K2	chr5:clu_14209_NA	chr5:102520445-102526543	15.6167	7	5.63041e-05	0.024506	-0.0388829
dlPFC	PPIP5K2	chr5:clu_14209_NA	chr5:102520445-102526543	15.6167	7	5.63041e-05	0.024506	-0.0405881
dlPFC	UIMC1	chr5:clu_15128_NA	chr5:176385155-176397743	17.5514	6	4.11633e-06	0.00672712	-0.0679352
dlPFC	UIMC1	chr5:clu_15128_NA	chr5:176385155-176397743	17.5514	6	4.11633e-06	0.00672712	0.0641695
dlPFC	UIMC1	chr5:clu_15128_NA	chr5:176385155-176397743	17.5514	6	4.11633e-06	0.00672712	0.0305831
dlPFC	UIMC1	chr5:clu_15128_NA	chr5:176385155-176397743	17.5514	6	4.11633e-06	0.00672712	0.0729621
dlPFC	UIMC1	chr5:clu_15128_NA	chr5:176385155-176397743	17.5514	6	4.11633e-06	0.00672712	-0.0681822
dlPFC	UIMC1	chr5:clu_15128_NA	chr5:176385155-176397743	17.5514	6	4.11633e-06	0.00672712	-0.0315682
dlPFC	LRP11	chr6:clu_40533_NA	chr6:150164260-150186021	8.41844	3	0.000763488	0.0924245	-0.0400127
dlPFC	LRP11	chr6:clu_40533_NA	chr6:150164260-150186021	8.41844	3	0.000763488	0.0924245	0.0562196
dlPFC	KIAA0895	chr7:clu_6553_NA	chr7:36374787-36406720	13.9435	7	0.000230497	0.0492833	-0.143997
dlPFC	KIAA0895	chr7:clu_6553_NA	chr7:36374787-36406720	13.9435	7	0.000230497	0.0492833	0.0316291
dlPFC	KIAA0895	chr7:clu_6553_NA	chr7:36374787-36406720	13.9435	7	0.000230497	0.0492833	0.0279573
dlPFC	KIAA0895	chr7:clu_6553_NA	chr7:36374787-36406720	13.9435	7	0.000230497	0.0492833	0.0521172
dlPFC	MRPS24,URGCP-MRPS24,URGCP	chr7:clu_6641_NA	chr7:43908975-43921258	10.5394	4	0.000305465	0.0568391	0.128951
dlPFC	MRPS24,URGCP-MRPS24,URGCP	chr7:clu_6641_NA	chr7:43908975-43921258	10.5394	4	0.000305465	0.0568391	-0.127976
dlPFC	ADCY1	chr7:clu_6710_NA	chr7:45614781-45649978	7.73419	2	0.000437607	0.0689311	0.0568177
dlPFC	ADCY1	chr7:clu_6710_NA	chr7:45614781-45649978	7.73419	2	0.000437607	0.0689311	-0.058851
dlPFC	GRB10	chr7:clu_6743_NA	chr7:50694675-50742133	10.1832	3	0.000142509	0.0368943	-0.050031
dlPFC	GRB10	chr7:clu_6743_NA	chr7:50694675-50742133	10.1832	3	0.000142509	0.0368943	0.0258946
dlPFC	CHCHD2	chr7:clu_6786_NA	chr7:56170704-56174057	13.9433	2	8.80081e-07	0.00297103	-0.118754
dlPFC	CHCHD2	chr7:clu_6786_NA	chr7:56170704-56174057	13.9433	2	8.80081e-07	0.00297103	0.121937
dlPFC	GTF2I	chr7:clu_6965_NA	chr7:74131270-74143124	8.87315	3	0.000496145	0.0754256	0.032049
dlPFC	GTF2I	chr7:clu_6965_NA	chr7:74131270-74143124	8.87315	3	0.000496145	0.0754256	-0.0618059
dlPFC	GTF2I	chr7:clu_6965_NA	chr7:74131270-74143124	8.87315	3	0.000496145	0.0754256	0.0320722
dlPFC	MDH2	chr7:clu_7001_NA	chr7:75677544-75686728	9.79749	3	0.000205916	0.0456295	0.0560434
dlPFC	MDH2	chr7:clu_7001_NA	chr7:75677544-75686728	9.79749	3	0.000205916	0.0456295	-0.0634863
dlPFC	TMEM130	chr7:clu_7324_NA	chr7:98453806-98467400	12.4009	6	0.000371527	0.0622736	-0.0414478
dlPFC	TMEM130	chr7:clu_7324_NA	chr7:98453806-98467400	12.4009	6	0.000371527	0.0622736	0.0626501
dlPFC	SRPK2	chr7:clu_7547_NA	chr7:105029149-105029691	6.4347	1	0.000333997	0.0598175	-0.198877
dlPFC	SRPK2	chr7:clu_7547_NA	chr7:105029149-105029691	6.4347	1	0.000333997	0.0598175	0.198877
dlPFC	CADPS2	chr7:clu_7737_NA	chr7:122377122-122526053	8.84231	3	0.000510882	0.0767733	-0.037768
dlPFC	CADPS2	chr7:clu_7737_NA	chr7:122377122-122526053	8.84231	3	0.000510882	0.0767733	0.0330545
dlPFC	HILPDA,RP11-155G14.6,RP11-155G14.5,RP11-212P7.3,METTL2B	chr7:clu_7788_NA	chr7:128095963-128119212	13.5862	8	0.000660106	0.0880635	0.0339279
dlPFC	HILPDA,RP11-155G14.6,RP11-155G14.5,RP11-212P7.3,METTL2B	chr7:clu_7788_NA	chr7:128095963-128119212	13.5862	8	0.000660106	0.0880635	0.132631
dlPFC	HILPDA,RP11-155G14.6,RP11-155G14.5,RP11-212P7.3,METTL2B	chr7:clu_7788_NA	chr7:128095963-128119212	13.5862	8	0.000660106	0.0880635	-0.144497
dlPFC	HILPDA,RP11-155G14.6,RP11-155G14.5,RP11-212P7.3,METTL2B	chr7:clu_7788_NA	chr7:128095963-128119212	13.5862	8	0.000660106	0.0880635	-0.0506896
dlPFC	PODXL	chr7:clu_7873_NA	chr7:131194344-131195587	10.6523	3	9.10039e-05	0.0309388	-0.0459724
dlPFC	PODXL	chr7:clu_7873_NA	chr7:131194344-131195587	10.6523	3	9.10039e-05	0.0309388	-0.0274946
dlPFC	PODXL	chr7:clu_7873_NA	chr7:131194344-131195587	10.6523	3	9.10039e-05	0.0309388	0.0904054
dlPFC	INSIG1	chr7:clu_8224_NA	chr7:155089669-155089969	6.08695	1	0.000484631	0.074106	-0.0531797
dlPFC	INSIG1	chr7:clu_8224_NA	chr7:155089669-155089969	6.08695	1	0.000484631	0.074106	0.0531797
dlPFC	PTPRN2	chr7:clu_8269_NA	chr7:157997965-158380250	25.6597	14	3.6645e-06	0.00638796	-0.125128
dlPFC	PTPRN2	chr7:clu_8269_NA	chr7:157997965-158380250	25.6597	14	3.6645e-06	0.00638796	0.0417683
dlPFC	PTPRN2	chr7:clu_8269_NA	chr7:157997965-158380250	25.6597	14	3.6645e-06	0.00638796	0.101575
dlPFC	STMN4	chr8:clu_15703_NA	chr8:27094422-27097488	7.46544	2	0.000572535	0.0809937	0.039476
dlPFC	STMN4	chr8:clu_15703_NA	chr8:27094422-27097488	7.46544	2	0.000572535	0.0809937	-0.0456898
dlPFC	HGSNAT	chr8:clu_15970_NA	chr8:43027529-43037288	12.5738	4	4.69873e-05	0.0235554	-0.0856148
dlPFC	HGSNAT	chr8:clu_15970_NA	chr8:43027529-43037288	12.5738	4	4.69873e-05	0.0235554	0.0395638
dlPFC	HGSNAT	chr8:clu_15970_NA	chr8:43027529-43037288	12.5738	4	4.69873e-05	0.0235554	0.0384726
dlPFC	INTS8	chr8:clu_16424_NA	chr8:95888717-95906463	5.81124	1	0.000651595	0.0873739	0.0507165
dlPFC	INTS8	chr8:clu_16424_NA	chr8:95888717-95906463	5.81124	1	0.000651595	0.0873739	-0.0507165
dlPFC	BAALC	chr8:clu_16548_NA	chr8:104153285-104258810	14.5421	8	0.000306498	0.0568391	0.0283681
dlPFC	BAALC	chr8:clu_16548_NA	chr8:104153285-104258810	14.5421	8	0.000306498	0.0568391	-0.0448543
dlPFC	RIMS2	chr8:clu_16559_NA	chr8:104513290-104709314	14.5979	9	0.000600532	0.0839718	0.0513502
dlPFC	RIMS2	chr8:clu_16559_NA	chr8:104513290-104709314	14.5979	9	0.000600532	0.0839718	-0.0554363
dlPFC	SYBU	chr8:clu_16605_NA	chr8:110631268-110703562	17.6818	13	0.000744337	0.0913483	-0.0894709
dlPFC	SYBU	chr8:clu_16605_NA	chr8:110631268-110703562	17.6818	13	0.000744337	0.0913483	0.0469195
dlPFC	CLTA	chr9:clu_32038_NA	chr9:36190908-36204065	8.46496	3	0.000730587	0.0909686	0.0474766
dlPFC	CLTA	chr9:clu_32038_NA	chr9:36190908-36204065	8.46496	3	0.000730587	0.0909686	-0.0489939
dlPFC	SMC5	chr9:clu_32266_NA	chr9:72882891-72895675	9.42029	4	0.000844691	0.0983466	0.0318915
dlPFC	SMC5	chr9:clu_32266_NA	chr9:72882891-72895675	9.42029	4	0.000844691	0.0983466	-0.0606486
dlPFC	DAPK1	chr9:clu_32452_NA	chr9:90112217-90113885	13.6073	5	5.18081e-05	0.0241907	0.173031
dlPFC	DAPK1	chr9:clu_32452_NA	chr9:90112217-90113885	13.6073	5	5.18081e-05	0.0241907	-0.146319
dlPFC	CARD19	chr9:clu_32525_NA	chr9:95870098-95874500	19.5185	6	7.03936e-07	0.00297103	0.0453677
dlPFC	CARD19	chr9:clu_32525_NA	chr9:95870098-95874500	19.5185	6	7.03936e-07	0.00297103	0.0548045
dlPFC	CARD19	chr9:clu_32525_NA	chr9:95870098-95874500	19.5185	6	7.03936e-07	0.00297103	-0.0950565
dlPFC	CARD19	chr9:clu_32525_NA	chr9:95870098-95874500	19.5185	6	7.03936e-07	0.00297103	0.0830732
dlPFC	CARD19	chr9:clu_32525_NA	chr9:95870098-95874500	19.5185	6	7.03936e-07	0.00297103	-0.0989772
dlPFC	FAM102A	chr9:clu_33146_NA	chr9:130715883-130742271	10.7092	5	0.000675101	0.0881717	-0.0995286
dlPFC	FAM102A	chr9:clu_33146_NA	chr9:130715883-130742271	10.7092	5	0.000675101	0.0881717	0.0772876
dlPFC	SURF4	chr9:clu_33378_NA	chr9:136230635-136232861	9.38942	2	8.36038e-05	0.0294574	-0.046315
dlPFC	DDX3X	chrX:clu_8610_NA	chrX:41196718-41200737	14.2487	6	7.57125e-05	0.0278835	-0.0361536
dlPFC	GRIPAP1	chrX:clu_8736_NA	chrX:48841815-48844533	13.1898	4	2.65283e-05	0.0169186	-0.0379695
dlPFC	ABCB7	chrX:clu_8970_NA	chrX:74332807-74375940	10.4663	4	0.000326577	0.059301	-0.0773124
dlPFC	ABCB7	chrX:clu_8970_NA	chrX:74332807-74375940	10.4663	4	0.000326577	0.059301	0.0861419
dlPFC	ABCB7	chrX:clu_8970_NA	chrX:74332807-74375940	10.4663	4	0.000326577	0.059301	-0.0278487
dlPFC	FAM122B	chrX:clu_9373_NA	chrX:133923296-133927845	10.554	4	0.000301438	0.0568391	0.0260541
dlPFC	FAM122B	chrX:clu_9373_NA	chrX:133923296-133927845	10.554	4	0.000301438	0.0568391	-0.0377125
dlPFC	FAM122B	chrX:clu_9373_NA	chrX:133923296-133927845	10.554	4	0.000301438	0.0568391	-0.135899
dlPFC	FAM122B	chrX:clu_9373_NA	chrX:133923296-133927845	10.554	4	0.000301438	0.0568391	0.0316089
dlPFC	FAM122B	chrX:clu_9373_NA	chrX:133923296-133927845	10.554	4	0.000301438	0.0568391	0.115948
NAc	UBE4B	chr1:clu_19908_NA	chr1:10161253-10163006	6.58267	2	0.00138415	0.0879549	-0.0717328
NAc	UBE4B	chr1:clu_19908_NA	chr1:10161253-10163006	6.58267	2	0.00138415	0.0879549	0.0361542
NAc	UBE4B	chr1:clu_19908_NA	chr1:10161253-10163006	6.58267	2	0.00138415	0.0879549	0.0355786
NAc	APITD1-CORT,CENPS,CORT	chr1:clu_19929_NA	chr1:10491458-10511443	13.6435	8	0.000630648	0.0596508	0.0500679
NAc	APITD1-CORT,CENPS,CORT	chr1:clu_19929_NA	chr1:10491458-10511443	13.6435	8	0.000630648	0.0596508	0.0471462
NAc	APITD1-CORT,CENPS,CORT	chr1:clu_19929_NA	chr1:10491458-10511443	13.6435	8	0.000630648	0.0596508	-0.106853
NAc	MINOS1,MINOS1-NBL1,NBL1	chr1:clu_20182_NA	chr1:19923166-19981505	24.0314	13	6.38455e-06	0.00348903	-0.0264526
NAc	C1QC	chr1:clu_20269_NA	chr1:22970207-22973720	10.6162	4	0.00028479	0.0375923	-0.0620668
NAc	C1QC	chr1:clu_20269_NA	chr1:22970207-22973720	10.6162	4	0.00028479	0.0375923	0.0338589
NAc	HMGCL	chr1:clu_20306_NA	chr1:24134813-24143165	9.6772	4	0.000669426	0.0609713	-0.0278306
NAc	HMGCL	chr1:clu_20306_NA	chr1:24134813-24143165	9.6772	4	0.000669426	0.0609713	0.0936332
NAc	HMGCL	chr1:clu_20306_NA	chr1:24134813-24143165	9.6772	4	0.000669426	0.0609713	-0.0861122
NAc	ADGRB2	chr1:clu_20541_NA	chr1:32210332-32230281	13.0684	8	0.000995146	0.0738896	0.0962484
NAc	ADGRB2	chr1:clu_20541_NA	chr1:32210332-32230281	13.0684	8	0.000995146	0.0738896	-0.0911162
NAc	SFPQ	chr1:clu_20652_NA	chr1:35643637-35652602	10.7241	4	0.000258018	0.0354276	0.0892966
NAc	SFPQ	chr1:clu_20652_NA	chr1:35643637-35652602	10.7241	4	0.000258018	0.0354276	-0.108461
NAc	NCDN	chr1:clu_20665_NA	chr1:36023484-36024708	15.0072	7	9.43837e-05	0.019838	-0.0557837
NAc	NCDN	chr1:clu_20665_NA	chr1:36023484-36024708	15.0072	7	9.43837e-05	0.019838	0.0326382
NAc	C1orf50,RP5-994D16.12	chr1:clu_20892_NA	chr1:43233029-43240408	13.3753	9	0.00153794	0.0928204	-0.0457322
NAc	C1orf50,RP5-994D16.12	chr1:clu_20892_NA	chr1:43233029-43240408	13.3753	9	0.00153794	0.0928204	0.0338741
NAc	SLC6A9	chr1:clu_20975_NA	chr1:44475768-44489920	15.8695	8	0.000103714	0.0206865	0.055645
NAc	SLC6A9	chr1:clu_20975_NA	chr1:44475768-44489920	15.8695	8	0.000103714	0.0206865	-0.0340077
NAc	SLC6A9	chr1:clu_20975_NA	chr1:44475768-44489920	15.8695	8	0.000103714	0.0206865	0.0364972
NAc	SLC6A9	chr1:clu_20975_NA	chr1:44475768-44489920	15.8695	8	0.000103714	0.0206865	-0.030325
NAc	SLC6A9	chr1:clu_20975_NA	chr1:44475768-44489920	15.8695	8	0.000103714	0.0206865	-0.0300632
NAc	MYSM1	chr1:clu_21296_NA	chr1:59127183-59133519	9.80015	3	0.000205393	0.0307198	0.039631
NAc	MYSM1	chr1:clu_21296_NA	chr1:59127183-59133519	9.80015	3	0.000205393	0.0307198	-0.0507256
NAc	MYSM1	chr1:clu_21296_NA	chr1:59127183-59133519	9.80015	3	0.000205393	0.0307198	0.0330188
NAc	AK4	chr1:clu_21411_NA	chr1:65613348-65684437	13.2951	8	0.000831857	0.0672476	-0.02647
NAc	DNAJC6	chr1:clu_21412_NA	chr1:65713986-65830318	17.1959	10	0.000158489	0.0264059	-0.0645355
NAc	DNAJC6	chr1:clu_21412_NA	chr1:65713986-65830318	17.1959	10	0.000158489	0.0264059	0.0337274
NAc	DNAJC6	chr1:clu_21412_NA	chr1:65713986-65830318	17.1959	10	0.000158489	0.0264059	0.0271986
NAc	FUBP1	chr1:clu_21594_NA	chr1:78433887-78435609	7.67301	2	0.000465217	0.0500456	0.0665631
NAc	FUBP1	chr1:clu_21594_NA	chr1:78433887-78435609	7.67301	2	0.000465217	0.0500456	-0.128373
NAc	FUBP1	chr1:clu_21594_NA	chr1:78433887-78435609	7.67301	2	0.000465217	0.0500456	0.0618102
NAc	IFI44L	chr1:clu_21599_NA	chr1:79086256-79101022	19.3192	9	1.3385e-05	0.00554139	-0.088382
NAc	IFI44L	chr1:clu_21599_NA	chr1:79086256-79101022	19.3192	9	1.3385e-05	0.00554139	0.125344
NAc	IFI44L	chr1:clu_21599_NA	chr1:79086256-79101022	19.3192	9	1.3385e-05	0.00554139	-0.0773028
NAc	IFI44L	chr1:clu_21599_NA	chr1:79086256-79101022	19.3192	9	1.3385e-05	0.00554139	0.0802296
NAc	IFI44L	chr1:clu_21599_NA	chr1:79086256-79101022	19.3192	9	1.3385e-05	0.00554139	-0.0750743
NAc	CTBS	chr1:clu_21646_NA	chr1:85029515-85031524	8.01661	2	0.000329937	0.0408454	-0.0636228
NAc	CTBS	chr1:clu_21646_NA	chr1:85029515-85031524	8.01661	2	0.000329937	0.0408454	0.0290087
NAc	CTBS	chr1:clu_21646_NA	chr1:85029515-85031524	8.01661	2	0.000329937	0.0408454	0.0346141
NAc	RPL5	chr1:clu_21790_NA	chr1:93297674-93299102	9.58799	2	6.85472e-05	0.0158727	0.0343251
NAc	RPL5	chr1:clu_21790_NA	chr1:93297674-93299102	9.58799	2	6.85472e-05	0.0158727	-0.0361791
NAc	RTCA	chr1:clu_21916_NA	chr1:100739008-100741155	6.87928	2	0.00102888	0.0753705	-0.0356032
NAc	RTCA	chr1:clu_21916_NA	chr1:100739008-100741155	6.87928	2	0.00102888	0.0753705	0.0344128
NAc	VCAM1	chr1:clu_21925_NA	chr1:101190446-101196754	7.01626	2	0.000897171	0.0696226	0.0748751
NAc	VCAM1	chr1:clu_21925_NA	chr1:101190446-101196754	7.01626	2	0.000897171	0.0696226	-0.0750691
NAc	PDE4DIP,CH17-472G23.4	chr1:clu_22306_NA	chr1:145016011-145075630	16.1083	8	8.51795e-05	0.0186196	-0.0258093
NAc	APH1A	chr1:clu_22449_NA	chr1:150239803-150240357	8.61238	3	0.00063536	0.0596508	0.025402
NAc	GOLPH3L	chr1:clu_22479_NA	chr1:150621224-150667132	12.9886	7	0.000508435	0.0513469	-0.0460711
NAc	GOLPH3L	chr1:clu_22479_NA	chr1:150621224-150667132	12.9886	7	0.000508435	0.0513469	0.05411
NAc	SETDB1	chr1:clu_22491_NA	chr1:150898824-150900180	11.4142	4	0.000137025	0.0239861	0.0382795
NAc	SETDB1	chr1:clu_22491_NA	chr1:150898824-150900180	11.4142	4	0.000137025	0.0239861	-0.0314962
NAc	SNX27	chr1:clu_22554_NA	chr1:151584857-151630711	13.2855	7	0.000398012	0.0447542	-0.103038
NAc	SNX27	chr1:clu_22554_NA	chr1:151584857-151630711	13.2855	7	0.000398012	0.0447542	0.0769486
NAc	ADAM15	chr1:clu_22684_NA	chr1:155032819-155034721	14.0393	10	0.00175368	0.0992228	0.121177
NAc	ADAM15	chr1:clu_22684_NA	chr1:155032819-155034721	14.0393	10	0.00175368	0.0992228	-0.0469953
NAc	ADAM15	chr1:clu_22684_NA	chr1:155032819-155034721	14.0393	10	0.00175368	0.0992228	0.0253326
NAc	ADAM15	chr1:clu_22684_NA	chr1:155032819-155034721	14.0393	10	0.00175368	0.0992228	-0.030323
NAc	GON4L	chr1:clu_22773_NA	chr1:155823597-155829095	11.8288	3	2.94485e-05	0.00924887	-0.115167
NAc	GON4L	chr1:clu_22773_NA	chr1:155823597-155829095	11.8288	3	2.94485e-05	0.00924887	0.19502
NAc	GON4L	chr1:clu_22773_NA	chr1:155823597-155829095	11.8288	3	2.94485e-05	0.00924887	-0.0808945
NAc	MPZL1	chr1:clu_23028_NA	chr1:167734986-167757057	17.5742	11	0.00023422	0.0335069	-0.065805
NAc	MPZL1	chr1:clu_23028_NA	chr1:167734986-167757057	17.5742	11	0.00023422	0.0335069	0.0848189
NAc	RALGPS2	chr1:clu_23221_NA	chr1:178780539-178848037	17.2304	9	7.41436e-05	0.0169407	-0.0434469
NAc	RALGPS2	chr1:clu_23221_NA	chr1:178780539-178848037	17.2304	9	7.41436e-05	0.0169407	-0.0504213
NAc	RALGPS2	chr1:clu_23221_NA	chr1:178780539-178848037	17.2304	9	7.41436e-05	0.0169407	0.0525834
NAc	CEP350	chr1:clu_23261_NA	chr1:180053313-180059849	7.75336	2	0.000429298	0.0474905	-0.103792
NAc	CEP350	chr1:clu_23261_NA	chr1:180053313-180059849	7.75336	2	0.000429298	0.0474905	0.105755
NAc	STX6	chr1:clu_23278_NA	chr1:180971836-180974430	5.29884	1	0.00113229	0.0789253	-0.0263168
NAc	STX6	chr1:clu_23278_NA	chr1:180971836-180974430	5.29884	1	0.00113229	0.0789253	0.0263168
NAc	NEK7	chr1:clu_23432_NA	chr1:198126406-198231705	13.0743	6	0.00020889	0.0307198	-0.0392884
NAc	NEK7	chr1:clu_23432_NA	chr1:198126406-198231705	13.0743	6	0.00020889	0.0307198	-0.029809
NAc	NEK7	chr1:clu_23432_NA	chr1:198126406-198231705	13.0743	6	0.00020889	0.0307198	0.0493856
NAc	DDX59	chr1:clu_23440_NA	chr1:200594175-200618202	13.7111	4	1.63296e-05	0.00617375	-0.0378585
NAc	DDX59	chr1:clu_23440_NA	chr1:200594175-200618202	13.7111	4	1.63296e-05	0.00617375	0.028067
NAc	DDX59	chr1:clu_23440_NA	chr1:200594175-200618202	13.7111	4	1.63296e-05	0.00617375	0.0278817
NAc	TMCC2	chr1:clu_23607_NA	chr1:205211172-205240248	5.43585	1	0.000976452	0.0727826	-0.0746322
NAc	TMCC2	chr1:clu_23607_NA	chr1:205211172-205240248	5.43585	1	0.000976452	0.0727826	0.0746322
NAc	KCTD3	chr1:clu_23770_NA	chr1:215785263-215792228	8.47345	3	0.000724736	0.0630659	0.0372862
NAc	GUK1	chr1:clu_23985_NA	chr1:228327860-228333212	29.6564	8	6.35665e-10	1.33607e-06	-0.0453312
NAc	GUK1	chr1:clu_23985_NA	chr1:228327860-228333212	29.6564	8	6.35665e-10	1.33607e-06	-0.0779437
NAc	GUK1	chr1:clu_23985_NA	chr1:228327860-228333212	29.6564	8	6.35665e-10	1.33607e-06	0.0309928
NAc	GUK1	chr1:clu_23985_NA	chr1:228327860-228333212	29.6564	8	6.35665e-10	1.33607e-06	0.0774558
NAc	GUK1	chr1:clu_23990_NA	chr1:228335400-228336366	8.39419	2	0.000226177	0.0328727	-0.0442108
NAc	GUK1	chr1:clu_23990_NA	chr1:228335400-228336366	8.39419	2	0.000226177	0.0328727	0.0449845
NAc	SIPA1L2	chr1:clu_24084_NA	chr1:232579428-232596633	8.92484	2	0.000133043	0.0237598	-0.15056
NAc	SIPA1L2	chr1:clu_24084_NA	chr1:232579428-232596633	8.92484	2	0.000133043	0.0237598	0.16609
NAc	ZNF692	chr1:clu_24354_NA	chr1:249148250-249149579	5.05525	1	0.00147426	0.0911436	0.0438362
NAc	ZNF692	chr1:clu_24354_NA	chr1:249148250-249149579	5.05525	1	0.00147426	0.0911436	-0.0438362
NAc	ZMYND11	chr10:clu_29273_NA	chr10:255988-282778	8.02208	3	0.00111058	0.0781597	-0.0388897
NAc	ZMYND11	chr10:clu_29273_NA	chr10:255988-282778	8.02208	3	0.00111058	0.0781597	0.0397464
NAc	NSUN6	chr10:clu_29546_NA	chr10:18885256-18903389	11.8563	6	0.000589771	0.0569431	0.0278433
NAc	ANKRD26	chr10:clu_29661_NA	chr10:27269768-27295846	10.4172	5	0.000870508	0.0687719	0.116103
NAc	ANKRD26	chr10:clu_29661_NA	chr10:27269768-27295846	10.4172	5	0.000870508	0.0687719	-0.130481
NAc	EPC1	chr10:clu_29757_NA	chr10:32594859-32667419	12.8682	2	2.57888e-06	0.00171867	-0.223626
NAc	EPC1	chr10:clu_29757_NA	chr10:32594859-32667419	12.8682	2	2.57888e-06	0.00171867	0.181418
NAc	EPC1	chr10:clu_29757_NA	chr10:32594859-32667419	12.8682	2	2.57888e-06	0.00171867	0.0422083
NAc	COX15	chr10:clu_30741_NA	chr10:101476218-101480744	6.99886	2	0.000912918	0.0696776	-0.0404301
NAc	COX15	chr10:clu_30741_NA	chr10:101476218-101480744	6.99886	2	0.000912918	0.0696776	0.0476574
NAc	FGFR2	chr10:clu_31173_NA	chr10:123263455-123274637	5.24064	1	0.0012059	0.0811577	-0.110732
NAc	FGFR2	chr10:clu_31173_NA	chr10:123263455-123274637	5.24064	1	0.0012059	0.0811577	0.110732
NAc	LHPP	chr10:clu_31220_NA	chr10:126137258-126176991	10.5883	4	0.000292143	0.038012	-0.0840117
NAc	LHPP	chr10:clu_31220_NA	chr10:126137258-126176991	10.5883	4	0.000292143	0.038012	0.078669
NAc	HRAS	chr11:clu_46192_NA	chr11:532630-533453	11.4148	3	4.38259e-05	0.0121527	0.0640652
NAc	HRAS	chr11:clu_46192_NA	chr11:532630-533453	11.4148	3	4.38259e-05	0.0121527	-0.0484985
NAc	RPLP2	chr11:clu_46233_NA	chr11:810039-811597	17.6877	2	2.0812e-08	2.58485e-05	-0.133168
NAc	RPLP2	chr11:clu_46233_NA	chr11:810039-811597	17.6877	2	2.0812e-08	2.58485e-05	0.13273
NAc	CHID1	chr11:clu_46241_NA	chr11:870499-899340	16.5494	6	1.00369e-05	0.00457082	0.121616
NAc	CHID1	chr11:clu_46241_NA	chr11:870499-899340	16.5494	6	1.00369e-05	0.00457082	-0.0634103
NAc	CHID1	chr11:clu_46241_NA	chr11:870499-899340	16.5494	6	1.00369e-05	0.00457082	-0.0592946
NAc	AP2A2	chr11:clu_46246_NA	chr11:972255-981198	7.20926	2	0.000739701	0.0637589	-0.0888343
NAc	AP2A2	chr11:clu_46246_NA	chr11:972255-981198	7.20926	2	0.000739701	0.0637589	0.0914411
NAc	TOLLIP	chr11:clu_46255_NA	chr11:1311639-1330696	7.99526	2	0.000337058	0.0414854	0.0944284
NAc	TOLLIP	chr11:clu_46255_NA	chr11:1311639-1330696	7.99526	2	0.000337058	0.0414854	-0.0904357
NAc	MRPL23	chr11:clu_46275_NA	chr11:1974085-1993789	10.6324	5	0.00072182	0.0630659	0.0558015
NAc	MRPL23	chr11:clu_46275_NA	chr11:1974085-1993789	10.6324	5	0.00072182	0.0630659	-0.0665767
NAc	APBB1	chr11:clu_46342_NA	chr11:6425052-6440576	17.3251	7	1.30108e-05	0.00546934	0.0894495
NAc	APBB1	chr11:clu_46342_NA	chr11:6425052-6440576	17.3251	7	1.30108e-05	0.00546934	-0.0947741
NAc	TMEM9B	chr11:clu_46419_NA	chr11:8977845-8986437	8.26522	3	0.000882597	0.0689031	0.0633925
NAc	TMEM9B	chr11:clu_46419_NA	chr11:8977845-8986437	8.26522	3	0.000882597	0.0689031	-0.0793726
NAc	MRVI1	chr11:clu_46482_NA	chr11:10655618-10750678	25.2965	21	0.000301517	0.0388257	0.033176
NAc	MRVI1	chr11:clu_46482_NA	chr11:10655618-10750678	25.2965	21	0.000301517	0.0388257	0.0975528
NAc	MRVI1	chr11:clu_46482_NA	chr11:10655618-10750678	25.2965	21	0.000301517	0.0388257	-0.054472
NAc	MRVI1	chr11:clu_46482_NA	chr11:10655618-10750678	25.2965	21	0.000301517	0.0388257	-0.0676266
NAc	MRVI1	chr11:clu_46482_NA	chr11:10655618-10750678	25.2965	21	0.000301517	0.0388257	-0.0337119
NAc	USP47	chr11:clu_46498_NA	chr11:11863771-11906014	11.6469	6	0.000703817	0.0630659	-0.0356411
NAc	USP47	chr11:clu_46498_NA	chr11:11863771-11906014	11.6469	6	0.000703817	0.0630659	-0.037821
NAc	USP47	chr11:clu_46498_NA	chr11:11863771-11906014	11.6469	6	0.000703817	0.0630659	0.0817101
NAc	PTPN5	chr11:clu_46661_NA	chr11:18787430-18813072	16.3524	4	1.37281e-06	0.00107173	0.100177
NAc	PTPN5	chr11:clu_46661_NA	chr11:18787430-18813072	16.3524	4	1.37281e-06	0.00107173	-0.0749893
NAc	CAPRIN1	chr11:clu_46794_NA	chr11:34073418-34093273	20.6989	3	5.38425e-09	9.19495e-06	-0.0705437
NAc	CAPRIN1	chr11:clu_46794_NA	chr11:34073418-34093273	20.6989	3	5.38425e-09	9.19495e-06	0.0702851
NAc	C11orf74	chr11:clu_46825_NA	chr11:36669705-36693025	8.07056	2	0.000312608	0.0391989	0.0630184
NAc	C11orf74	chr11:clu_46825_NA	chr11:36669705-36693025	8.07056	2	0.000312608	0.0391989	-0.0364909
NAc	C11orf74	chr11:clu_46825_NA	chr11:36669705-36693025	8.07056	2	0.000312608	0.0391989	-0.0265276
NAc	BEST1	chr11:clu_47157_NA	chr11:61717899-61722579	9.53649	4	0.000760416	0.064327	-0.0567132
NAc	BEST1	chr11:clu_47157_NA	chr11:61717899-61722579	9.53649	4	0.000760416	0.064327	0.0333961
NAc	ASRGL1	chr11:clu_47166_NA	chr11:62105639-62124459	8.47999	2	0.000207582	0.0307198	-0.0716889
NAc	ASRGL1	chr11:clu_47166_NA	chr11:62105639-62124459	8.47999	2	0.000207582	0.0307198	0.079176
NAc	RTN3	chr11:clu_47257_NA	chr11:63449250-63517463	31.4415	11	2.68923e-09	4.8987e-06	-0.120245
NAc	RTN3	chr11:clu_47257_NA	chr11:63449250-63517463	31.4415	11	2.68923e-09	4.8987e-06	0.0422983
NAc	RTN3	chr11:clu_47257_NA	chr11:63449250-63517463	31.4415	11	2.68923e-09	4.8987e-06	0.0735612
NAc	TRPT1	chr11:clu_47286_NA	chr11:63991963-63993522	13.3275	7	0.000384429	0.044588	0.157754
NAc	TRPT1	chr11:clu_47286_NA	chr11:63991963-63993522	13.3275	7	0.000384429	0.044588	-0.0313234
NAc	TRPT1	chr11:clu_47286_NA	chr11:63991963-63993522	13.3275	7	0.000384429	0.044588	-0.098097
NAc	NDUFS8	chr11:clu_47570_NA	chr11:67798200-67803720	12.1152	6	0.000473683	0.0502176	-0.0714306
NAc	NDUFS8	chr11:clu_47570_NA	chr11:67798200-67803720	12.1152	6	0.000473683	0.0502176	0.0655107
NAc	FAT3	chr11:clu_47993_NA	chr11:92616559-92623657	14.3579	9	0.000723546	0.0630659	-0.0596275
NAc	FAT3	chr11:clu_47993_NA	chr11:92616559-92623657	14.3579	9	0.000723546	0.0630659	0.0447335
NAc	AMOTL1	chr11:clu_48040_NA	chr11:94474154-94532556	11.7469	6	0.000646911	0.0601231	-0.05163
NAc	AMOTL1	chr11:clu_48040_NA	chr11:94474154-94532556	11.7469	6	0.000646911	0.0601231	-0.0402445
NAc	AMOTL1	chr11:clu_48040_NA	chr11:94474154-94532556	11.7469	6	0.000646911	0.0601231	0.100321
NAc	AMOTL1	chr11:clu_48040_NA	chr11:94474154-94532556	11.7469	6	0.000646911	0.0601231	0.0658486
NAc	AMOTL1	chr11:clu_48040_NA	chr11:94474154-94532556	11.7469	6	0.000646911	0.0601231	-0.0887653
NAc	NCAM1	chr11:clu_48257_NA	chr11:113085233-113102367	9.01441	4	0.00121819	0.0817836	-0.0304781
NAc	NCAM1	chr11:clu_48257_NA	chr11:113085233-113102367	9.01441	4	0.00121819	0.0817836	0.0569757
NAc	NCAM1	chr11:clu_48257_NA	chr11:113085233-113102367	9.01441	4	0.00121819	0.0817836	-0.0290762
NAc	NCAM1	chr11:clu_48260_NA	chr11:113131045-113140910	5.72582	1	0.00071431	0.0630659	0.102106
NAc	NCAM1	chr11:clu_48260_NA	chr11:113131045-113140910	5.72582	1	0.00071431	0.0630659	-0.102106
NAc	CCDC84	chr11:clu_48411_NA	chr11:118869027-118869721	6.98625	2	0.000924503	0.0703027	-0.133651
NAc	CCDC84	chr11:clu_48411_NA	chr11:118869027-118869721	6.98625	2	0.000924503	0.0703027	0.133638
NAc	FAM118B	chr11:clu_48591_NA	chr11:126120628-126126462	10.5554	3	9.98442e-05	0.0204734	-0.0398563
NAc	LRP6	chr12:clu_26968_NA	chr12:12284856-12288109	9.03079	3	0.000427172	0.0474473	-0.0292212
NAc	CCDC91	chr12:clu_27197_NA	chr12:28460682-28603094	13.6878	8	0.000608785	0.058572	-0.0284159
NAc	CCDC91	chr12:clu_27197_NA	chr12:28460682-28603094	13.6878	8	0.000608785	0.058572	0.0350888
NAc	FGD4	chr12:clu_27257_NA	chr12:32552893-32717071	15.2927	5	1.13091e-05	0.00490493	-0.105808
NAc	FGD4	chr12:clu_27257_NA	chr12:32552893-32717071	15.2927	5	1.13091e-05	0.00490493	0.0625013
NAc	SCAF11	chr12:clu_27378_NA	chr12:46345510-46355483	9.90854	4	0.000542678	0.0535311	-0.041634
NAc	SCAF11	chr12:clu_27378_NA	chr12:46345510-46355483	9.90854	4	0.000542678	0.0535311	-0.0288702
NAc	SCAF11	chr12:clu_27378_NA	chr12:46345510-46355483	9.90854	4	0.000542678	0.0535311	0.0615167
NAc	ARF3,RP11-302B13.5,WNT10B	chr12:clu_27458_NA	chr12:49334971-49363872	19.1627	13	0.000256019	0.0353509	0.0271434
NAc	ATP5B	chr12:clu_27836_NA	chr12:57038739-57039621	14.01	2	8.23222e-07	0.00066158	0.093418
NAc	ATP5B	chr12:clu_27836_NA	chr12:57038739-57039621	14.01	2	8.23222e-07	0.00066158	-0.0944788
NAc	DPY19L2	chr12:clu_27966_NA	chr12:63984903-63991653	16.4811	7	2.69098e-05	0.0086504	-0.054686
NAc	DPY19L2	chr12:clu_27966_NA	chr12:63984903-63991653	16.4811	7	2.69098e-05	0.0086504	0.0317997
NAc	LEMD3	chr12:clu_28014_NA	chr12:65632594-65633766	7.93021	2	0.00035971	0.0432983	-0.0253842
NAc	LEMD3	chr12:clu_28014_NA	chr12:65632594-65633766	7.93021	2	0.00035971	0.0432983	0.0254447
NAc	NAP1L1	chr12:clu_28152_NA	chr12:76449938-76453578	17.8186	3	8.93452e-08	9.76508e-05	0.0301247
NAc	MGAT4C	chr12:clu_28264_NA	chr12:86373573-86377301	5.68139	1	0.000749307	0.064032	0.0301169
NAc	MGAT4C	chr12:clu_28264_NA	chr12:86373573-86377301	5.68139	1	0.000749307	0.064032	-0.0301169
NAc	CEP290	chr12:clu_28269_NA	chr12:88447523-88449353	9.66485	3	0.000233667	0.0335069	-0.0642288
NAc	CEP290	chr12:clu_28269_NA	chr12:88447523-88449353	9.66485	3	0.000233667	0.0335069	0.0558652
NAc	ANKS1B	chr12:clu_28422_NA	chr12:99898419-100166700	14.6515	10	0.00111273	0.0781597	-0.0763343
NAc	ANKS1B	chr12:clu_28422_NA	chr12:99898419-100166700	14.6515	10	0.00111273	0.0781597	0.062837
NAc	HCFC2	chr12:clu_28507_NA	chr12:104490211-104492121	11.2899	3	4.94017e-05	0.0128557	0.0273765
NAc	SACS	chr13:clu_12139_NA	chr13:23942626-23949258	10.0154	2	4.47043e-05	0.0121771	0.121185
NAc	SACS	chr13:clu_12139_NA	chr13:23942626-23949258	10.0154	2	4.47043e-05	0.0121771	-0.115955
NAc	RP11-307N16.6,SPATA13	chr13:clu_12152_NA	chr13:24558072-24825856	22.3977	14	4.40317e-05	0.0121527	-0.113001
NAc	RP11-307N16.6,SPATA13	chr13:clu_12152_NA	chr13:24558072-24825856	22.3977	14	4.40317e-05	0.0121527	0.0524679
NAc	RP11-307N16.6,SPATA13	chr13:clu_12152_NA	chr13:24558072-24825856	22.3977	14	4.40317e-05	0.0121527	0.027298
NAc	RP11-307N16.6,SPATA13	chr13:clu_12152_NA	chr13:24558072-24825856	22.3977	14	4.40317e-05	0.0121527	0.0733271
NAc	CDK8	chr13:clu_12192_NA	chr13:26928017-26959348	8.29885	3	0.000854967	0.0685077	0.0497465
NAc	ZC3H13	chr13:clu_12484_NA	chr13:46549973-46553948	8.2299	3	0.000912573	0.0696776	-0.0639176
NAc	ZC3H13	chr13:clu_12484_NA	chr13:46549973-46553948	8.2299	3	0.000912573	0.0696776	0.103284
NAc	ZC3H13	chr13:clu_12484_NA	chr13:46549973-46553948	8.2299	3	0.000912573	0.0696776	-0.0422091
NAc	TPTE2P3,RP11-78J21.7,MRPS31P4	chr13:clu_12620_NA	chr13:53157323-53201573	14.3429	9	0.00073202	0.0632965	-0.0575247
NAc	MYCBP2	chr13:clu_12704_NA	chr13:77670616-77695508	15.4018	8	0.000152269	0.0255252	0.0284189
NAc	NA	chr13:clu_12756_NA	chr13:84376570-84385318	13.0566	7	0.000480733	0.0502176	0.0495489
NAc	NA	chr13:clu_12756_NA	chr13:84376570-84385318	13.0566	7	0.000480733	0.0502176	0.0339033
NAc	NA	chr13:clu_12756_NA	chr13:84376570-84385318	13.0566	7	0.000480733	0.0502176	0.0319621
NAc	NA	chr13:clu_12756_NA	chr13:84376570-84385318	13.0566	7	0.000480733	0.0502176	-0.0720746
NAc	BIVM-ERCC5,ERCC5	chr13:clu_12904_NA	chr13:103504643-103506638	7.11745	2	0.000810834	0.0666877	-0.0312507
NAc	BIVM-ERCC5,ERCC5	chr13:clu_12904_NA	chr13:103504643-103506638	7.11745	2	0.000810834	0.0666877	0.0283083
NAc	PCID2	chr13:clu_12981_NA	chr13:113839874-113849385	18.4369	5	6.34873e-07	0.000525675	0.0442849
NAc	PCID2	chr13:clu_12981_NA	chr13:113839874-113849385	18.4369	5	6.34873e-07	0.000525675	-0.0411218
NAc	RP5-1021I20.4,ZNF410	chr14:clu_1031_NA	chr14:74387808-74390098	17.3864	4	5.17238e-07	0.000441657	0.0371811
NAc	RP5-1021I20.4,ZNF410	chr14:clu_1031_NA	chr14:74387808-74390098	17.3864	4	5.17238e-07	0.000441657	-0.0476191
NAc	AREL1	chr14:clu_1070_NA	chr14:75152363-75158744	6.65331	2	0.00128974	0.0832391	0.046313
NAc	AREL1	chr14:clu_1070_NA	chr14:75152363-75158744	6.65331	2	0.00128974	0.0832391	-0.0958309
NAc	AREL1	chr14:clu_1070_NA	chr14:75152363-75158744	6.65331	2	0.00128974	0.0832391	0.0495179
NAc	MEG3	chr14:clu_1496_NA	chr14:101296086-101297758	8.56411	3	0.000665099	0.0609713	0.0351875
NAc	MEG3	chr14:clu_1496_NA	chr14:101296086-101297758	8.56411	3	0.000665099	0.0609713	-0.0283269
NAc	AP1G2	chr14:clu_151_NA	chr14:24031787-24032589	10.51	3	0.000104279	0.0206865	-0.0321088
NAc	AP1G2	chr14:clu_151_NA	chr14:24031787-24032589	10.51	3	0.000104279	0.0206865	0.0314825
NAc	AP1G2	chr14:clu_151_NA	chr14:24031787-24032589	10.51	3	0.000104279	0.0206865	0.0254873
NAc	EIF5	chr14:clu_1568_NA	chr14:103800597-103802129	19.2954	8	5.85356e-06	0.00333214	-0.0470684
NAc	EIF5	chr14:clu_1568_NA	chr14:103800597-103802129	19.2954	8	5.85356e-06	0.00333214	0.0602761
NAc	CKB	chr14:clu_1575_NA	chr14:103986648-103987600	11.0161	2	1.64356e-05	0.00617375	0.0621974
NAc	CKB	chr14:clu_1575_NA	chr14:103986648-103987600	11.0161	2	1.64356e-05	0.00617375	-0.0636984
NAc	SDR39U1	chr14:clu_239_NA	chr14:24910132-24911552	12.8361	8	0.00119482	0.0810462	0.114115
NAc	SDR39U1	chr14:clu_239_NA	chr14:24910132-24911552	12.8361	8	0.00119482	0.0810462	-0.0331565
NAc	SDR39U1	chr14:clu_239_NA	chr14:24910132-24911552	12.8361	8	0.00119482	0.0810462	-0.0928501
NAc	RALGAPA1	chr14:clu_393_NA	chr14:36211771-36219688	11.5465	4	0.000121324	0.022399	0.0755022
NAc	RALGAPA1	chr14:clu_393_NA	chr14:36211771-36219688	11.5465	4	0.000121324	0.022399	-0.0736833
NAc	MDGA2	chr14:clu_482_NA	chr14:47343403-47351247	9.48598	2	7.59083e-05	0.0171415	-0.0281829
NAc	MDGA2	chr14:clu_482_NA	chr14:47343403-47351247	9.48598	2	7.59083e-05	0.0171415	-0.0400348
NAc	MDGA2	chr14:clu_482_NA	chr14:47343403-47351247	9.48598	2	7.59083e-05	0.0171415	0.0682177
NAc	DDHD1	chr14:clu_636_NA	chr14:53540565-53570401	15.3151	9	0.000342528	0.0417823	-0.0266736
NAc	DDHD1	chr14:clu_636_NA	chr14:53540565-53570401	15.3151	9	0.000342528	0.0417823	0.02999
NAc	SAMD4A	chr14:clu_649_NA	chr14:55169298-55215533	7.35824	2	0.00063732	0.0596508	-0.105241
NAc	SAMD4A	chr14:clu_649_NA	chr14:55169298-55215533	7.35824	2	0.00063732	0.0596508	0.0925193
NAc	NAA30	chr14:clu_697_NA	chr14:57857423-57863470	7.38305	2	0.000621703	0.0593965	-0.0432771
NAc	NAA30	chr14:clu_697_NA	chr14:57857423-57863470	7.38305	2	0.000621703	0.0593965	0.0313626
NAc	SNHG14	chr15:clu_10364_NA	chr15:25324142-25326238	14.8357	3	1.61804e-06	0.0011949	0.0466852
NAc	SNHG14	chr15:clu_10364_NA	chr15:25324142-25326238	14.8357	3	1.61804e-06	0.0011949	-0.121734
NAc	SNHG14	chr15:clu_10364_NA	chr15:25324142-25326238	14.8357	3	1.61804e-06	0.0011949	0.0639126
NAc	SNHG14	chr15:clu_10375_NA	chr15:25357041-25362557	7.97196	3	0.00116441	0.0805475	-0.131762
NAc	SNHG14	chr15:clu_10375_NA	chr15:25357041-25362557	7.97196	3	0.00116441	0.0805475	0.112058
NAc	MTMR10	chr15:clu_10518_NA	chr15:31253276-31266517	8.7921	4	0.0014877	0.0911436	-0.0283718
NAc	MTMR10	chr15:clu_10518_NA	chr15:31253276-31266517	8.7921	4	0.0014877	0.0911436	0.0361454
NAc	MTMR10	chr15:clu_10518_NA	chr15:31253276-31266517	8.7921	4	0.0014877	0.0911436	-0.0335837
NAc	RP11-632K20.7	chr15:clu_10530_NA	chr15:32815414-32820733	11.0895	6	0.00112369	0.0785475	-0.137574
NAc	RP11-632K20.7	chr15:clu_10530_NA	chr15:32815414-32820733	11.0895	6	0.00112369	0.0785475	0.0802416
NAc	RP11-632K20.7	chr15:clu_10530_NA	chr15:32815414-32820733	11.0895	6	0.00112369	0.0785475	0.0450843
NAc	RYR3	chr15:clu_10557_NA	chr15:34018707-34023675	6.64947	2	0.00129471	0.0832391	-0.0255682
NAc	RYR3	chr15:clu_10557_NA	chr15:34018707-34023675	6.64947	2	0.00129471	0.0832391	0.0362072
NAc	RASGRP1	chr15:clu_10632_NA	chr15:38792340-38794513	8.08227	3	0.00104922	0.0765603	0.0362951
NAc	RASGRP1	chr15:clu_10632_NA	chr15:38792340-38794513	8.08227	3	0.00104922	0.0765603	-0.0358555
NAc	TYRO3	chr15:clu_10724_NA	chr15:41857339-41860415	10.235	3	0.000135624	0.0239221	-0.0270018
NAc	UBR1	chr15:clu_10815_NA	chr15:43269065-43281017	10.6149	6	0.00166809	0.0967703	0.0281774
NAc	CASC4	chr15:clu_10882_NA	chr15:44615217-44671888	7.61986	3	0.00162285	0.0962332	-0.0315397
NAc	TMOD3	chr15:clu_11060_NA	chr15:52194233-52200973	8.24283	2	0.000263138	0.0359485	-0.0422351
NAc	GNB5	chr15:clu_11070_NA	chr15:52420441-52425575	7.786	3	0.00138768	0.0879746	0.0435639
NAc	GNB5	chr15:clu_11070_NA	chr15:52420441-52425575	7.786	3	0.00138768	0.0879746	-0.0304385
NAc	TLN2	chr15:clu_11227_NA	chr15:62881961-62939474	15.68	8	0.000121212	0.022399	-0.0257306
NAc	SNX1	chr15:clu_11301_NA	chr15:64429131-64430241	4.95827	1	0.001638	0.0963729	-0.0358856
NAc	SNX1	chr15:clu_11301_NA	chr15:64429131-64430241	4.95827	1	0.001638	0.0963729	0.0358856
NAc	MYO9A	chr15:clu_11483_NA	chr15:72313358-72338773	10.6157	6	0.00166693	0.0967703	-0.0422029
NAc	EDC3	chr15:clu_11562_NA	chr15:74932960-74963796	6.55188	2	0.00142742	0.0894563	-0.0654494
NAc	EDC3	chr15:clu_11562_NA	chr15:74932960-74963796	6.55188	2	0.00142742	0.0894563	0.0610035
NAc	IQGAP1	chr15:clu_11907_NA	chr15:91025513-91026593	7.32522	2	0.000658717	0.0606019	0.0536966
NAc	IQGAP1	chr15:clu_11907_NA	chr15:91025513-91026593	7.32522	2	0.000658717	0.0606019	-0.142347
NAc	IQGAP1	chr15:clu_11907_NA	chr15:91025513-91026593	7.32522	2	0.000658717	0.0606019	0.08865
NAc	PRC1,VPS33B	chr15:clu_11941_NA	chr15:91527370-91542907	9.03363	4	0.0011973	0.0810462	0.0323224
NAc	PRC1,VPS33B	chr15:clu_11941_NA	chr15:91527370-91542907	9.03363	4	0.0011973	0.0810462	-0.044482
NAc	PRC1,VPS33B	chr15:clu_11941_NA	chr15:91527370-91542907	9.03363	4	0.0011973	0.0810462	-0.0314777
NAc	PRC1,VPS33B	chr15:clu_11941_NA	chr15:91527370-91542907	9.03363	4	0.0011973	0.0810462	0.0651748
NAc	METTL26	chr16:clu_31441_NA	chr16:684797-686094	38.7212	12	1.26592e-11	6.918e-08	0.0363991
NAc	METTL26	chr16:clu_31441_NA	chr16:684797-686094	38.7212	12	1.26592e-11	6.918e-08	0.0295035
NAc	METTL26	chr16:clu_31441_NA	chr16:684797-686094	38.7212	12	1.26592e-11	6.918e-08	-0.0733341
NAc	ABAT	chr16:clu_31789_NA	chr16:8758071-8839858	17.719	8	2.22468e-05	0.00769456	-0.064514
NAc	ABAT	chr16:clu_31789_NA	chr16:8758071-8839858	17.719	8	2.22468e-05	0.00769456	0.0329977
NAc	ABAT	chr16:clu_31789_NA	chr16:8758071-8839858	17.719	8	2.22468e-05	0.00769456	0.0312031
NAc	EARS2	chr16:clu_32123_NA	chr16:23556024-23563470	8.57209	2	0.000189318	0.0302509	0.0408117
NAc	EARS2	chr16:clu_32123_NA	chr16:23556024-23563470	8.57209	2	0.000189318	0.0302509	-0.0335418
NAc	SLC5A11	chr16:clu_32150_NA	chr16:24857759-24873922	12.9354	7	0.000531166	0.0532021	0.0728662
NAc	SLC5A11	chr16:clu_32150_NA	chr16:24857759-24873922	12.9354	7	0.000531166	0.0532021	-0.163042
NAc	SLC5A11	chr16:clu_32150_NA	chr16:24857759-24873922	12.9354	7	0.000531166	0.0532021	0.0395436
NAc	SLC5A11	chr16:clu_32150_NA	chr16:24857759-24873922	12.9354	7	0.000531166	0.0532021	0.0498858
NAc	N4BP1	chr16:clu_32432_NA	chr16:48582025-48587450	8.18242	2	0.000279525	0.0372573	0.0445192
NAc	N4BP1	chr16:clu_32432_NA	chr16:48582025-48587450	8.18242	2	0.000279525	0.0372573	-0.0618118
NAc	KIFC3	chr16:clu_32599_NA	chr16:57806200-57831984	13.0624	8	0.0009999	0.0740414	0.0294185
NAc	KIFC3	chr16:clu_32599_NA	chr16:57806200-57831984	13.0624	8	0.0009999	0.0740414	0.0991617
NAc	KIFC3	chr16:clu_32599_NA	chr16:57806200-57831984	13.0624	8	0.0009999	0.0740414	-0.0448703
NAc	KIFC3	chr16:clu_32599_NA	chr16:57806200-57831984	13.0624	8	0.0009999	0.0740414	-0.10285
NAc	NDRG4	chr16:clu_32616_NA	chr16:58543256-58545326	7.14336	2	0.000790089	0.0658183	0.0582064
NAc	NDRG4	chr16:clu_32616_NA	chr16:58543256-58545326	7.14336	2	0.000790089	0.0658183	-0.083813
NAc	NDRG4	chr16:clu_32616_NA	chr16:58543256-58545326	7.14336	2	0.000790089	0.0658183	0.0256066
NAc	RP11-252A24.2	chr16:clu_32997_NA	chr16:74370604-74372343	8.14199	2	0.000291058	0.038012	-0.0261587
NAc	ZFP1	chr16:clu_33028_NA	chr16:75182541-75186807	8.27265	3	0.000876417	0.0688139	-0.0347511
NAc	ZFP1	chr16:clu_33028_NA	chr16:75182541-75186807	8.27265	3	0.000876417	0.0688139	-0.121854
NAc	ZFP1	chr16:clu_33028_NA	chr16:75182541-75186807	8.27265	3	0.000876417	0.0688139	0.160225
NAc	SREBF1	chr17:clu_2288_NA	chr17:17717724-17718149	7.60961	2	0.000495666	0.0511079	-0.122528
NAc	SREBF1	chr17:clu_2288_NA	chr17:17717724-17718149	7.60961	2	0.000495666	0.0511079	0.10611
NAc	EPN2	chr17:clu_2359_NA	chr17:19140844-19213198	27.182	11	1.01295e-07	0.000106454	0.0546496
NAc	EPN2	chr17:clu_2359_NA	chr17:19140844-19213198	27.182	11	1.01295e-07	0.000106454	-0.0473119
NAc	EPN2	chr17:clu_2359_NA	chr17:19140844-19213198	27.182	11	1.01295e-07	0.000106454	-0.0257234
NAc	GOSR1	chr17:clu_2572_NA	chr17:28811788-28819697	12.8152	5	0.000105234	0.0206865	0.0265724
NAc	GOSR1	chr17:clu_2572_NA	chr17:28811788-28819697	12.8152	5	0.000105234	0.0206865	-0.0339491
NAc	TMEM98	chr17:clu_2671_NA	chr17:31255255-31258499	8.46764	3	0.000728737	0.0632127	0.0405712
NAc	TMEM98	chr17:clu_2671_NA	chr17:31255255-31258499	8.46764	3	0.000728737	0.0632127	-0.109828
NAc	TMEM98	chr17:clu_2671_NA	chr17:31255255-31258499	8.46764	3	0.000728737	0.0632127	0.077573
NAc	CNP	chr17:clu_2919_NA	chr17:40118905-40123910	18.6013	4	1.63626e-07	0.000159676	-0.0467937
NAc	CNP	chr17:clu_2919_NA	chr17:40118905-40123910	18.6013	4	1.63626e-07	0.000159676	0.0462981
NAc	MLX	chr17:clu_2969_NA	chr17:40719673-40720855	6.56721	2	0.00140572	0.0887064	0.0986008
NAc	MLX	chr17:clu_2969_NA	chr17:40719673-40720855	6.56721	2	0.00140572	0.0887064	-0.121079
NAc	DYNLL2	chr17:clu_3431_NA	chr17:56161044-56166503	10.681	2	2.29781e-05	0.00775128	-0.0531923
NAc	DYNLL2	chr17:clu_3431_NA	chr17:56161044-56166503	10.681	2	2.29781e-05	0.00775128	0.0521267
NAc	TSPOAP1	chr17:clu_3444_NA	chr17:56402363-56404949	15.8573	11	0.000847424	0.0681766	-0.059109
NAc	TSPOAP1	chr17:clu_3444_NA	chr17:56402363-56404949	15.8573	11	0.000847424	0.0681766	0.0391093
NAc	TSPOAP1	chr17:clu_3444_NA	chr17:56402363-56404949	15.8573	11	0.000847424	0.0681766	0.0507807
NAc	SUPT4H1	chr17:clu_3447_NA	chr17:56428869-56429428	6.34958	2	0.00174748	0.0992228	-0.0311032
NAc	SUPT4H1	chr17:clu_3447_NA	chr17:56428869-56429428	6.34958	2	0.00174748	0.0992228	0.0355375
NAc	ARSG,RP11-120M18.2,PRKAR1A	chr17:clu_3728_NA	chr17:66397591-66511535	38.106	17	1.7906e-09	3.49474e-06	0.118797
NAc	ARSG,RP11-120M18.2,PRKAR1A	chr17:clu_3728_NA	chr17:66397591-66511535	38.106	17	1.7906e-09	3.49474e-06	-0.166882
NAc	AFMID	chr17:clu_4063_NA	chr17:76187141-76202992	26.9846	22	0.000166136	0.0271826	0.0394096
NAc	AFMID	chr17:clu_4063_NA	chr17:76187141-76202992	26.9846	22	0.000166136	0.0271826	-0.0341967
NAc	AFMID	chr17:clu_4063_NA	chr17:76187141-76202992	26.9846	22	0.000166136	0.0271826	0.0496931
NAc	AATK	chr17:clu_4161_NA	chr17:79102344-79104861	11.1036	2	1.50581e-05	0.00596299	0.138335
NAc	AATK	chr17:clu_4161_NA	chr17:79102344-79104861	11.1036	2	1.50581e-05	0.00596299	-0.137322
NAc	GPS1	chr17:clu_4233_NA	chr17:80009400-80011150	13.2034	5	7.43992e-05	0.0169407	-0.0393197
NAc	GPS1	chr17:clu_4233_NA	chr17:80009400-80011150	13.2034	5	7.43992e-05	0.0169407	0.0351071
NAc	GPS1	chr17:clu_4233_NA	chr17:80009400-80011150	13.2034	5	7.43992e-05	0.0169407	-0.035794
NAc	RNMT	chr18:clu_13216_NA	chr18:13726728-13734463	11.9476	7	0.00118873	0.0810462	-0.0676524
NAc	RNMT	chr18:clu_13216_NA	chr18:13726728-13734463	11.9476	7	0.00118873	0.0810462	0.0402926
NAc	IMPACT	chr18:clu_13336_NA	chr18:22020582-22023064	7.18224	2	0.000759966	0.064327	0.0317447
NAc	IMPACT	chr18:clu_13336_NA	chr18:22020582-22023064	7.18224	2	0.000759966	0.064327	-0.0332787
NAc	DTNA	chr18:clu_13398_NA	chr18:32407640-32428260	15.472	9	0.000302659	0.0388257	-0.0390779
NAc	DTNA	chr18:clu_13398_NA	chr18:32407640-32428260	15.472	9	0.000302659	0.0388257	0.0739994
NAc	DTNA	chr18:clu_13398_NA	chr18:32407640-32428260	15.472	9	0.000302659	0.0388257	-0.027843
NAc	MAPRE2	chr18:clu_13409_NA	chr18:32585517-32677410	8.56035	3	0.000667472	0.0609713	0.0321223
NAc	MAPRE2	chr18:clu_13409_NA	chr18:32585517-32677410	8.56035	3	0.000667472	0.0609713	-0.0536892
NAc	BTBD2	chr19:clu_24480_NA	chr19:1997462-2015296	7.4349	1	0.000115192	0.0219914	0.0257489
NAc	BTBD2	chr19:clu_24480_NA	chr19:1997462-2015296	7.4349	1	0.000115192	0.0219914	-0.0257489
NAc	OAZ1,LLfos-48D6.2	chr19:clu_24503_NA	chr19:2269743-2271781	10.009	3	0.000168289	0.0272091	-0.0407666
NAc	OAZ1,LLfos-48D6.2	chr19:clu_24503_NA	chr19:2269743-2271781	10.009	3	0.000168289	0.0272091	0.036295
NAc	HSD11B1L,RPL36	chr19:clu_24660_NA	chr19:5684916-5690042	16.9142	12	0.000717846	0.0630659	0.075995
NAc	HSD11B1L,RPL36	chr19:clu_24660_NA	chr19:5684916-5690042	16.9142	12	0.000717846	0.0630659	-0.0253525
NAc	HSD11B1L,RPL36	chr19:clu_24660_NA	chr19:5684916-5690042	16.9142	12	0.000717846	0.0630659	-0.0563124
NAc	HSD11B1L,RPL36	chr19:clu_24660_NA	chr19:5684916-5690042	16.9142	12	0.000717846	0.0630659	-0.0453523
NAc	DNM2	chr19:clu_24892_NA	chr19:10906115-10909162	10.4192	4	0.000340919	0.0417725	-0.0496011
NAc	DNM2	chr19:clu_24892_NA	chr19:10906115-10909162	10.4192	4	0.000340919	0.0417725	0.0693969
NAc	DNM2	chr19:clu_24892_NA	chr19:10906115-10909162	10.4192	4	0.000340919	0.0417725	-0.0256025
NAc	DNM2	chr19:clu_24892_NA	chr19:10906115-10909162	10.4192	4	0.000340919	0.0417725	-0.0378685
NAc	DNM2	chr19:clu_24892_NA	chr19:10906115-10909162	10.4192	4	0.000340919	0.0417725	0.0436753
NAc	ZNF440,ZNF439,ZNF69	chr19:clu_24957_NA	chr19:11925265-12014430	17.7636	11	0.000202751	0.0307198	0.0375025
NAc	ZNF440,ZNF439,ZNF69	chr19:clu_24957_NA	chr19:11925265-12014430	17.7636	11	0.000202751	0.0307198	-0.0735173
NAc	GIPC1	chr19:clu_25080_NA	chr19:14590336-14591405	8.47799	3	0.000721632	0.0630659	-0.14245
NAc	GIPC1	chr19:clu_25080_NA	chr19:14590336-14591405	8.47799	3	0.000721632	0.0630659	0.143589
NAc	SLC35E1,CTD-3222D19.2	chr19:clu_25135_NA	chr19:16677468-16682755	8.97686	4	0.00126006	0.082801	0.0922712
NAc	SLC35E1,CTD-3222D19.2	chr19:clu_25135_NA	chr19:16677468-16682755	8.97686	4	0.00126006	0.082801	-0.028191
NAc	SLC35E1,CTD-3222D19.2	chr19:clu_25135_NA	chr19:16677468-16682755	8.97686	4	0.00126006	0.082801	-0.0643256
NAc	AC002985.3,HOMER3	chr19:clu_25276_NA	chr19:19043854-19049162	6.94153	2	0.000966791	0.0724682	-0.140088
NAc	AC002985.3,HOMER3	chr19:clu_25276_NA	chr19:19043854-19049162	6.94153	2	0.000966791	0.0724682	0.14467
NAc	CTC-260F20.3,YJEFN3	chr19:clu_25314_NA	chr19:19639800-19645843	16.6482	9	0.000118578	0.022192	-0.0729854
NAc	CTC-260F20.3,YJEFN3	chr19:clu_25314_NA	chr19:19639800-19645843	16.6482	9	0.000118578	0.022192	0.0298297
NAc	VSTM2B	chr19:clu_25426_NA	chr19:30018302-30020726	14.1076	5	3.30384e-05	0.00992024	0.06617
NAc	VSTM2B	chr19:clu_25426_NA	chr19:30018302-30020726	14.1076	5	3.30384e-05	0.00992024	-0.0323669
NAc	VSTM2B	chr19:clu_25426_NA	chr19:30018302-30020726	14.1076	5	3.30384e-05	0.00992024	-0.0362075
NAc	PDCD5	chr19:clu_25448_NA	chr19:33073138-33078159	17.7626	7	8.9085e-06	0.00419683	-0.0361941
NAc	PDCD5	chr19:clu_25448_NA	chr19:33073138-33078159	17.7626	7	8.9085e-06	0.00419683	0.0374375
NAc	ZNF302	chr19:clu_25513_NA	chr19:35169718-35174060	11.0355	5	0.000507589	0.0513469	-0.0363376
NAc	ARHGAP33	chr19:clu_25583_NA	chr19:36266566-36268726	9.89436	2	5.04585e-05	0.0130069	-0.190535
NAc	ARHGAP33	chr19:clu_25583_NA	chr19:36266566-36268726	9.89436	2	5.04585e-05	0.0130069	0.203782
NAc	APLP1	chr19:clu_25591_NA	chr19:36364615-36365643	26.1374	2	4.45333e-12	3.04207e-08	0.195748
NAc	APLP1	chr19:clu_25591_NA	chr19:36364615-36365643	26.1374	2	4.45333e-12	3.04207e-08	-0.195128
NAc	DYRK1B,FBL	chr19:clu_25769_NA	chr19:40322608-40325308	9.93472	2	4.84625e-05	0.0127326	-0.139395
NAc	DYRK1B,FBL	chr19:clu_25769_NA	chr19:40322608-40325308	9.93472	2	4.84625e-05	0.0127326	0.146624
NAc	PLD3	chr19:clu_25797_NA	chr19:40854631-40872326	17.7119	14	0.0012719	0.0829439	-0.0260146
NAc	NUMBL,COQ8B	chr19:clu_25821_NA	chr19:41190461-41198856	20.6695	5	8.01381e-08	9.52041e-05	-0.205033
NAc	NUMBL,COQ8B	chr19:clu_25821_NA	chr19:41190461-41198856	20.6695	5	8.01381e-08	9.52041e-05	-0.0416141
NAc	NUMBL,COQ8B	chr19:clu_25821_NA	chr19:41190461-41198856	20.6695	5	8.01381e-08	9.52041e-05	0.254328
NAc	MEGF8	chr19:clu_25888_NA	chr19:42848985-42854300	10.048	4	0.000478071	0.0502176	0.0913565
NAc	MEGF8	chr19:clu_25888_NA	chr19:42848985-42854300	10.048	4	0.000478071	0.0502176	-0.0968558
NAc	MARK4	chr19:clu_25986_NA	chr19:45754897-45766371	10.7233	3	8.50273e-05	0.0186196	-0.120037
NAc	MARK4	chr19:clu_25986_NA	chr19:45754897-45766371	10.7233	3	8.50273e-05	0.0186196	0.026666
NAc	MARK4	chr19:clu_25986_NA	chr19:45754897-45766371	10.7233	3	8.50273e-05	0.0186196	0.0935718
NAc	EML2	chr19:clu_26009_NA	chr19:46124590-46133209	8.97984	3	0.00044835	0.0490029	-0.0335967
NAc	EML2	chr19:clu_26009_NA	chr19:46124590-46133209	8.97984	3	0.00044835	0.0490029	-0.0534324
NAc	EML2	chr19:clu_26009_NA	chr19:46124590-46133209	8.97984	3	0.00044835	0.0490029	0.0640756
NAc	SNRNP70	chr19:clu_26173_NA	chr19:49610969-49611079	6.36077	1	0.000361467	0.043319	-0.122869
NAc	SNRNP70	chr19:clu_26173_NA	chr19:49610969-49611079	6.36077	1	0.000361467	0.043319	0.122869
NAc	TTYH1	chr19:clu_26410_NA	chr19:54926852-54930302	15.2881	6	3.05358e-05	0.00948136	0.0536342
NAc	TTYH1	chr19:clu_26410_NA	chr19:54926852-54930302	15.2881	6	3.05358e-05	0.00948136	-0.0342435
NAc	SYT5	chr19:clu_26439_NA	chr19:55687486-55690331	9.16352	4	0.00106506	0.0773143	0.0812882
NAc	SYT5	chr19:clu_26439_NA	chr19:55687486-55690331	9.16352	4	0.00106506	0.0773143	-0.0647495
NAc	EPN1	chr19:clu_26478_NA	chr19:56186801-56196762	31.6573	7	3.2777e-11	1.49266e-07	-0.11864
NAc	EPN1	chr19:clu_26478_NA	chr19:56186801-56196762	31.6573	7	3.2777e-11	1.49266e-07	0.113119
NAc	EPN1	chr19:clu_26479_NA	chr19:56200360-56201233	8.07803	2	0.000310282	0.0391989	-0.0429114
NAc	EPN1	chr19:clu_26479_NA	chr19:56200360-56201233	8.07803	2	0.000310282	0.0391989	-0.0970738
NAc	EPN1	chr19:clu_26479_NA	chr19:56200360-56201233	8.07803	2	0.000310282	0.0391989	0.139985
NAc	RPS5	chr19:clu_26598_NA	chr19:58899612-58905864	9.55817	4	0.000745641	0.064032	0.0298941
NAc	WDR43	chr2:clu_35961_NA	chr2:29137074-29145785	11.4447	2	1.07062e-05	0.00479569	0.0253712
NAc	HNRNPLL	chr2:clu_36122_NA	chr2:38813023-38829580	6.67908	2	0.00125694	0.082801	0.0859015
NAc	HNRNPLL	chr2:clu_36122_NA	chr2:38813023-38829580	6.67908	2	0.00125694	0.082801	-0.0809777
NAc	SPTBN1	chr2:clu_36335_NA	chr2:54662642-54753509	18.2077	12	0.000277744	0.0372573	-0.0846777
NAc	SPTBN1	chr2:clu_36335_NA	chr2:54662642-54753509	18.2077	12	0.000277744	0.0372573	-0.0264684
NAc	SPTBN1	chr2:clu_36335_NA	chr2:54662642-54753509	18.2077	12	0.000277744	0.0372573	0.0675805
NAc	PPP4R3B	chr2:clu_36375_NA	chr2:55795499-55804451	8.60908	3	0.000637351	0.0596508	0.0309773
NAc	KIAA1841,RP11-493E12.3,C2orf74	chr2:clu_36433_NA	chr2:61361411-61391489	23.4714	19	0.000363971	0.0434286	0.0408578
NAc	RAB1A	chr2:clu_36542_NA	chr2:65315824-65325105	10.305	4	0.00037833	0.0445582	-0.0298749
NAc	ZNF638	chr2:clu_36656_NA	chr2:71607695-71623271	15.8081	9	0.000231935	0.0335069	0.0569644
NAc	ZNF638	chr2:clu_36656_NA	chr2:71607695-71623271	15.8081	9	0.000231935	0.0335069	-0.044648
NAc	DYSF	chr2:clu_36670_NA	chr2:71840540-71871095	14.0689	4	1.16956e-05	0.00499329	-0.144692
NAc	DYSF	chr2:clu_36670_NA	chr2:71840540-71871095	14.0689	4	1.16956e-05	0.00499329	0.258714
NAc	DYSF	chr2:clu_36670_NA	chr2:71840540-71871095	14.0689	4	1.16956e-05	0.00499329	-0.0990499
NAc	DCTN1	chr2:clu_36739_NA	chr2:74598855-74604559	14.254	8	0.000386708	0.044588	-0.0580801
NAc	DCTN1	chr2:clu_36739_NA	chr2:74598855-74604559	14.254	8	0.000386708	0.044588	0.0330519
NAc	DCTN1	chr2:clu_36741_NA	chr2:74605372-74618921	12.2731	3	1.92101e-05	0.00699241	0.120116
NAc	DCTN1	chr2:clu_36741_NA	chr2:74605372-74618921	12.2731	3	1.92101e-05	0.00699241	-0.115226
NAc	ANKRD36C	chr2:clu_37014_NA	chr2:96502856-96519457	9.82261	4	0.000586715	0.056849	-0.0453075
NAc	ANKRD36C	chr2:clu_37014_NA	chr2:96502856-96519457	9.82261	4	0.000586715	0.056849	0.0342027
NAc	ANKRD36C	chr2:clu_37031_NA	chr2:96583790-96587355	8.86133	2	0.000141767	0.0245167	-0.14684
NAc	ANKRD36C	chr2:clu_37031_NA	chr2:96583790-96587355	8.86133	2	0.000141767	0.0245167	0.298177
NAc	ANKRD36C	chr2:clu_37031_NA	chr2:96583790-96587355	8.86133	2	0.000141767	0.0245167	-0.151337
NAc	CCDC93	chr2:clu_37419_NA	chr2:118706971-118709949	5.0384	1	0.00150148	0.0915766	-0.0373522
NAc	CCDC93	chr2:clu_37419_NA	chr2:118706971-118709949	5.0384	1	0.00150148	0.0915766	0.0373522
NAc	BIN1	chr2:clu_37489_NA	chr2:127808488-127816587	46.0807	11	6.27994e-15	8.57965e-11	0.0511719
NAc	BIN1	chr2:clu_37489_NA	chr2:127808488-127816587	46.0807	11	6.27994e-15	8.57965e-11	-0.110208
NAc	BIN1	chr2:clu_37489_NA	chr2:127808488-127816587	46.0807	11	6.27994e-15	8.57965e-11	0.0375991
NAc	MZT2B	chr2:clu_37548_NA	chr2:130939370-130948042	18.6463	7	4.12828e-06	0.00240003	0.0450256
NAc	MZT2B	chr2:clu_37548_NA	chr2:130939370-130948042	18.6463	7	4.12828e-06	0.00240003	-0.0912825
NAc	ACVR2A	chr2:clu_37727_NA	chr2:148657467-148672760	6.6565	2	0.00128564	0.0832391	-0.0800713
NAc	ACVR2A	chr2:clu_37727_NA	chr2:148657467-148672760	6.6565	2	0.00128564	0.0832391	0.160539
NAc	ACVR2A	chr2:clu_37727_NA	chr2:148657467-148672760	6.6565	2	0.00128564	0.0832391	-0.0804682
NAc	RIF1	chr2:clu_37767_NA	chr2:152324660-152325155	9.37736	3	0.000307255	0.0391989	-0.0425483
NAc	AC009961.3	chr2:clu_37866_NA	chr2:160473112-160567228	16.0096	6	1.61805e-05	0.00617375	0.0266976
NAc	AC009961.3	chr2:clu_37866_NA	chr2:160473112-160567228	16.0096	6	1.61805e-05	0.00617375	-0.0270648
NAc	AC009961.3	chr2:clu_37866_NA	chr2:160473112-160567228	16.0096	6	1.61805e-05	0.00617375	0.0344212
NAc	AC009961.3	chr2:clu_37866_NA	chr2:160473112-160567228	16.0096	6	1.61805e-05	0.00617375	-0.0766828
NAc	AC009961.3	chr2:clu_37866_NA	chr2:160473112-160567228	16.0096	6	1.61805e-05	0.00617375	-0.0293391
NAc	AC009961.3	chr2:clu_37866_NA	chr2:160473112-160567228	16.0096	6	1.61805e-05	0.00617375	0.0635901
NAc	SP3	chr2:clu_38131_NA	chr2:174783513-174829133	28.9274	6	1.22627e-10	3.04605e-07	0.146142
NAc	SP3	chr2:clu_38131_NA	chr2:174783513-174829133	28.9274	6	1.22627e-10	3.04605e-07	-0.141217
NAc	HNRNPA3	chr2:clu_38177_NA	chr2:178084042-178086788	10.1789	2	3.79627e-05	0.011035	-0.0432029
NAc	HNRNPA3	chr2:clu_38177_NA	chr2:178084042-178086788	10.1789	2	3.79627e-05	0.011035	0.102549
NAc	HNRNPA3	chr2:clu_38177_NA	chr2:178084042-178086788	10.1789	2	3.79627e-05	0.011035	-0.0593461
NAc	OSBPL6	chr2:clu_38196_NA	chr2:179171013-179192983	8.96732	4	0.00127093	0.0829439	-0.0766109
NAc	OSBPL6	chr2:clu_38196_NA	chr2:179171013-179192983	8.96732	4	0.00127093	0.0829439	0.0533239
NAc	INPP1	chr2:clu_38355_NA	chr2:191225032-191231421	10.9597	4	0.000207957	0.0307198	-0.0354531
NAc	INPP1	chr2:clu_38355_NA	chr2:191225032-191231421	10.9597	4	0.000207957	0.0307198	0.0375925
NAc	FAM126B	chr2:clu_38499_NA	chr2:201887655-201888682	8.55014	2	0.000193519	0.0305109	-0.0595591
NAc	FAM126B	chr2:clu_38499_NA	chr2:201887655-201888682	8.55014	2	0.000193519	0.0305109	0.0392063
NAc	NRP2	chr2:clu_38612_NA	chr2:206631527-206656959	6.41301	2	0.00164008	0.0963729	-0.133987
NAc	NRP2	chr2:clu_38612_NA	chr2:206631527-206656959	6.41301	2	0.00164008	0.0963729	0.106949
NAc	NRP2	chr2:clu_38612_NA	chr2:206631527-206656959	6.41301	2	0.00164008	0.0963729	0.0270374
NAc	CREB1	chr2:clu_38649_NA	chr2:208425096-208432187	9.8524	3	0.000195411	0.0305109	0.0545931
NAc	CREB1	chr2:clu_38649_NA	chr2:208425096-208432187	9.8524	3	0.000195411	0.0305109	-0.141344
NAc	CREB1	chr2:clu_38649_NA	chr2:208425096-208432187	9.8524	3	0.000195411	0.0305109	0.0917358
NAc	ATIC	chr2:clu_38762_NA	chr2:216213972-216227369	11.692	6	0.000677586	0.0615095	-0.0321041
NAc	ATIC	chr2:clu_38762_NA	chr2:216213972-216227369	11.692	6	0.000677586	0.0615095	0.0394698
NAc	CAB39	chr2:clu_39085_NA	chr2:231577945-231655587	11.1243	3	5.79036e-05	0.0144824	-0.0933688
NAc	CAB39	chr2:clu_39085_NA	chr2:231577945-231655587	11.1243	3	5.79036e-05	0.0144824	0.0900128
NAc	ITM2C	chr2:clu_39087_NA	chr2:231729499-231740395	39.0025	5	2.19294e-15	5.99199e-11	-0.0950956
NAc	ITM2C	chr2:clu_39087_NA	chr2:231729499-231740395	39.0025	5	2.19294e-15	5.99199e-11	0.0975935
NAc	ARMC9	chr2:clu_39103_NA	chr2:232100094-232123704	8.11054	3	0.00102156	0.0750354	0.0301985
NAc	ARMC9	chr2:clu_39103_NA	chr2:232100094-232123704	8.11054	3	0.00102156	0.0750354	-0.0317071
NAc	STK25	chr2:clu_39306_NA	chr2:242441123-242448638	21.2599	4	1.30161e-08	1.87185e-05	0.102958
NAc	STK25	chr2:clu_39306_NA	chr2:242441123-242448638	21.2599	4	1.30161e-08	1.87185e-05	-0.105144
NAc	RP4-673D20.3,RP5-968J1.1,RP5-858L17.1	chr20:clu_39373_NA	chr20:1722128-1871430	33.0554	34	0.000793058	0.0658648	-0.0369248
NAc	RP4-673D20.3,RP5-968J1.1,RP5-858L17.1	chr20:clu_39373_NA	chr20:1722128-1871430	33.0554	34	0.000793058	0.0658648	-0.105281
NAc	RP4-673D20.3,RP5-968J1.1,RP5-858L17.1	chr20:clu_39373_NA	chr20:1722128-1871430	33.0554	34	0.000793058	0.0658648	0.0303491
NAc	RP4-673D20.3,RP5-968J1.1,RP5-858L17.1	chr20:clu_39373_NA	chr20:1722128-1871430	33.0554	34	0.000793058	0.0658648	-0.0427135
NAc	RP4-673D20.3,RP5-968J1.1,RP5-858L17.1	chr20:clu_39373_NA	chr20:1722128-1871430	33.0554	34	0.000793058	0.0658648	0.0922419
NAc	RP4-673D20.3,RP5-968J1.1,RP5-858L17.1	chr20:clu_39373_NA	chr20:1722128-1871430	33.0554	34	0.000793058	0.0658648	0.0413049
NAc	RP4-673D20.3,RP5-968J1.1,RP5-858L17.1	chr20:clu_39373_NA	chr20:1722128-1871430	33.0554	34	0.000793058	0.0658648	0.0278746
NAc	TTLL9	chr20:clu_39766_NA	chr20:30486368-30512812	13.3897	5	6.29695e-05	0.015206	-0.0677498
NAc	TTLL9	chr20:clu_39766_NA	chr20:30486368-30512812	13.3897	5	6.29695e-05	0.015206	-0.0273775
NAc	TTLL9	chr20:clu_39766_NA	chr20:30486368-30512812	13.3897	5	6.29695e-05	0.015206	0.0701561
NAc	TTLL9	chr20:clu_39766_NA	chr20:30486368-30512812	13.3897	5	6.29695e-05	0.015206	0.0284579
NAc	TRPC4AP	chr20:clu_39872_NA	chr20:33591419-33592261	10.5253	3	0.000102756	0.0206865	0.0661598
NAc	TRPC4AP	chr20:clu_39872_NA	chr20:33591419-33592261	10.5253	3	0.000102756	0.0206865	-0.0655685
NAc	OSER1-AS1	chr20:clu_40097_NA	chr20:42839717-42853461	17.9737	12	0.000330363	0.0408454	-0.0305434
NAc	OSER1-AS1	chr20:clu_40097_NA	chr20:42839717-42853461	17.9737	12	0.000330363	0.0408454	0.101845
NAc	OSER1-AS1	chr20:clu_40097_NA	chr20:42839717-42853461	17.9737	12	0.000330363	0.0408454	-0.0956997
NAc	OSER1-AS1	chr20:clu_40097_NA	chr20:42839717-42853461	17.9737	12	0.000330363	0.0408454	0.0258647
NAc	GDAP1L1	chr20:clu_40098_NA	chr20:42875842-42891870	11.1517	6	0.00106674	0.0773143	-0.0789278
NAc	GDAP1L1	chr20:clu_40098_NA	chr20:42875842-42891870	11.1517	6	0.00106674	0.0773143	-0.033569
NAc	GDAP1L1	chr20:clu_40098_NA	chr20:42875842-42891870	11.1517	6	0.00106674	0.0773143	0.124473
NAc	FAM217B	chr20:clu_40350_NA	chr20:58517567-58524309	12.024	5	0.000212556	0.0310582	-0.104232
NAc	FAM217B	chr20:clu_40350_NA	chr20:58517567-58524309	12.024	5	0.000212556	0.0310582	0.0839802
NAc	PPDPF	chr20:clu_40430_NA	chr20:62152247-62152865	11.1571	2	1.42731e-05	0.00573527	-0.115699
NAc	PPDPF	chr20:clu_40430_NA	chr20:62152247-62152865	11.1571	2	1.42731e-05	0.00573527	0.114739
NAc	SLC2A11,AP000350.10,MIF	chr22:clu_18818_NA	chr22:24226616-24236959	14.3396	1	8.54153e-08	9.72453e-05	0.101072
NAc	SLC2A11,AP000350.10,MIF	chr22:clu_18818_NA	chr22:24226616-24236959	14.3396	1	8.54153e-08	9.72453e-05	-0.101072
NAc	MTMR3	chr22:clu_18981_NA	chr22:30353077-30374431	9.2774	4	0.000961076	0.0724682	-0.0320992
NAc	FBXO7	chr22:clu_19083_NA	chr22:32883815-32889092	9.06281	2	0.000115897	0.0219914	-0.0254406
NAc	PICK1	chr22:clu_19178_NA	chr22:38465129-38466845	11.4314	1	1.73986e-06	0.00121897	-0.0363078
NAc	PICK1	chr22:clu_19178_NA	chr22:38465129-38466845	11.4314	1	1.73986e-06	0.00121897	0.0363078
NAc	L3MBTL2	chr22:clu_19298_NA	chr22:41613206-41616738	9.38602	4	0.000871273	0.0687719	-0.0392144
NAc	L3MBTL2	chr22:clu_19298_NA	chr22:41613206-41616738	9.38602	4	0.000871273	0.0687719	0.0419842
NAc	POLDIP3	chr22:clu_19377_NA	chr22:42995799-42998776	7.35083	2	0.000642061	0.0598761	0.0638447
NAc	POLDIP3	chr22:clu_19377_NA	chr22:42995799-42998776	7.35083	2	0.000642061	0.0598761	-0.0533308
NAc	FAM19A5	chr22:clu_19472_NA	chr22:49103656-49246570	6.67696	2	0.0012596	0.082801	0.0404685
NAc	FAM19A5	chr22:clu_19472_NA	chr22:49103656-49246570	6.67696	2	0.0012596	0.082801	-0.063733
NAc	MAPK12	chr22:clu_19522_NA	chr22:50695075-50696672	11.0383	6	0.00117279	0.0809224	0.0818066
NAc	MAPK12	chr22:clu_19522_NA	chr22:50695075-50696672	11.0383	6	0.00117279	0.0809224	0.0641255
NAc	MAPK12	chr22:clu_19522_NA	chr22:50695075-50696672	11.0383	6	0.00117279	0.0809224	-0.0925021
NAc	SETD5	chr3:clu_43144_NA	chr3:9476169-9476508	11.0125	2	1.64941e-05	0.00617375	0.073402
NAc	SETD5	chr3:clu_43144_NA	chr3:9476169-9476508	11.0125	2	1.64941e-05	0.00617375	-0.144025
NAc	SETD5	chr3:clu_43144_NA	chr3:9476169-9476508	11.0125	2	1.64941e-05	0.00617375	0.0706232
NAc	SETD5	chr3:clu_43149_NA	chr3:9490314-9495423	8.15017	2	0.000288686	0.0379233	0.0365993
NAc	SETD5	chr3:clu_43149_NA	chr3:9490314-9495423	8.15017	2	0.000288686	0.0379233	-0.123729
NAc	SETD5	chr3:clu_43149_NA	chr3:9490314-9495423	8.15017	2	0.000288686	0.0379233	0.0871296
NAc	XPC	chr3:clu_43293_NA	chr3:14207085-14211938	12.9745	4	3.24025e-05	0.00983741	-0.0318068
NAc	CAPN7	chr3:clu_43328_NA	chr3:15282124-15288239	16.6482	9	0.000118575	0.022192	0.0413315
NAc	CAPN7	chr3:clu_43328_NA	chr3:15282124-15288239	16.6482	9	0.000118575	0.022192	-0.0374719
NAc	UBP1	chr3:clu_43518_NA	chr3:33444396-33450728	6.40761	2	0.00164896	0.096687	-0.0433096
NAc	UBP1	chr3:clu_43518_NA	chr3:33444396-33450728	6.40761	2	0.00164896	0.096687	0.0614952
NAc	TRANK1	chr3:clu_43558_NA	chr3:36876398-36880104	6.57403	2	0.00139616	0.0883074	0.0715478
NAc	TRANK1	chr3:clu_43558_NA	chr3:36876398-36880104	6.57403	2	0.00139616	0.0883074	-0.0809898
NAc	GOLGA4	chr3:clu_43591_NA	chr3:37396678-37407571	9.16127	2	0.00010503	0.0206865	0.107005
NAc	GOLGA4	chr3:clu_43591_NA	chr3:37396678-37407571	9.16127	2	0.00010503	0.0206865	-0.108467
NAc	RPL14	chr3:clu_43678_NA	chr3:40498854-40499381	6.82828	2	0.00108272	0.0779078	0.0744858
NAc	RPL14	chr3:clu_43678_NA	chr3:40498854-40499381	6.82828	2	0.00108272	0.0779078	-0.0712087
NAc	ULK4	chr3:clu_43693_NA	chr3:41759353-41841624	9.98996	5	0.00126062	0.082801	-0.0280187
NAc	ULK4	chr3:clu_43693_NA	chr3:41759353-41841624	9.98996	5	0.00126062	0.082801	-0.0511038
NAc	ULK4	chr3:clu_43693_NA	chr3:41759353-41841624	9.98996	5	0.00126062	0.082801	0.0787779
NAc	ARIH2	chr3:clu_43944_NA	chr3:48956431-49002352	21.4951	18	0.000802785	0.06642	-0.0294727
NAc	ARIH2	chr3:clu_43944_NA	chr3:48956431-49002352	21.4951	18	0.000802785	0.06642	0.0322397
NAc	APEH	chr3:clu_44016_NA	chr3:49711846-49713127	24.7575	4	4.55902e-10	1.03809e-06	-0.119069
NAc	APEH	chr3:clu_44016_NA	chr3:49711846-49713127	24.7575	4	4.55902e-10	1.03809e-06	0.109595
NAc	FOXP1	chr3:clu_44500_NA	chr3:71349031-71542577	14.4164	10	0.00132612	0.0850585	-0.0469118
NAc	FOXP1	chr3:clu_44500_NA	chr3:71349031-71542577	14.4164	10	0.00132612	0.0850585	0.0453752
NAc	ABHD10	chr3:clu_44764_NA	chr3:111698050-111705761	9.73117	4	0.000637463	0.0596508	-0.0660511
NAc	ABHD10	chr3:clu_44764_NA	chr3:111698050-111705761	9.73117	4	0.000637463	0.0596508	0.052483
NAc	KALRN	chr3:clu_45009_NA	chr3:124352800-124369655	7.61401	2	0.00049349	0.0511079	0.0730951
NAc	KALRN	chr3:clu_45009_NA	chr3:124352800-124369655	7.61401	2	0.00049349	0.0511079	-0.0676993
NAc	SLC12A8	chr3:clu_45020_NA	chr3:124802896-124826325	16.4801	9	0.000135702	0.0239221	-0.0789511
NAc	SLC12A8	chr3:clu_45020_NA	chr3:124802896-124826325	16.4801	9	0.000135702	0.0239221	0.0887679
NAc	SLC12A8	chr3:clu_45020_NA	chr3:124802896-124826325	16.4801	9	0.000135702	0.0239221	-0.0346835
NAc	ALDH1L1	chr3:clu_45053_NA	chr3:125831723-125836848	7.5961	3	0.00165956	0.0967703	0.0473345
NAc	ALDH1L1	chr3:clu_45053_NA	chr3:125831723-125836848	7.5961	3	0.00165956	0.0967703	-0.0578683
NAc	ALDH1L1	chr3:clu_45058_NA	chr3:125876351-125879696	12.2493	4	6.34419e-05	0.015206	-0.0334557
NAc	RUVBL1	chr3:clu_45098_NA	chr3:127831863-127872046	8.36302	3	0.000804605	0.06642	0.103856
NAc	RUVBL1	chr3:clu_45098_NA	chr3:127831863-127872046	8.36302	3	0.000804605	0.06642	-0.0907353
NAc	ATP2C1	chr3:clu_45162_NA	chr3:130678185-130682815	6.37185	2	0.001709	0.0976916	-0.0251659
NAc	STAG1	chr3:clu_45278_NA	chr3:136240259-136323151	16.3003	10	0.000317816	0.039653	-0.0361878
NAc	STAG1	chr3:clu_45278_NA	chr3:136240259-136323151	16.3003	10	0.000317816	0.039653	0.0519016
NAc	MLF1	chr3:clu_45546_NA	chr3:158289136-158314651	14.1473	7	0.000194443	0.0305109	-0.0511477
NAc	MLF1	chr3:clu_45546_NA	chr3:158289136-158314651	14.1473	7	0.000194443	0.0305109	-0.0381088
NAc	MLF1	chr3:clu_45546_NA	chr3:158289136-158314651	14.1473	7	0.000194443	0.0305109	0.0385658
NAc	MLF1	chr3:clu_45546_NA	chr3:158289136-158314651	14.1473	7	0.000194443	0.0305109	0.0262002
NAc	KLHL24	chr3:clu_45819_NA	chr3:183353535-183368084	14.4852	9	0.000655548	0.0606019	0.0417517
NAc	EIF4G1	chr3:clu_45879_NA	chr3:184041029-184041196	8.27314	1	4.7477e-05	0.0127182	-0.123116
NAc	EIF4G1	chr3:clu_45879_NA	chr3:184041029-184041196	8.27314	1	4.7477e-05	0.0127182	0.123116
NAc	VPS8	chr3:clu_45907_NA	chr3:184648356-184654034	5.0186	1	0.0015341	0.0928204	-0.0313506
NAc	VPS8	chr3:clu_45907_NA	chr3:184648356-184654034	5.0186	1	0.0015341	0.0928204	0.0313506
NAc	ZNF595	chr4:clu_4308_NA	chr4:53385-85622	9.17855	4	0.00105073	0.0765603	0.120877
NAc	ZNF595	chr4:clu_4308_NA	chr4:53385-85622	9.17855	4	0.00105073	0.0765603	-0.105027
NAc	C4orf50	chr4:clu_4513_NA	chr4:5992551-6013557	11.0432	4	0.000192643	0.0305109	0.0959625
NAc	C4orf50	chr4:clu_4513_NA	chr4:5992551-6013557	11.0432	4	0.000192643	0.0305109	-0.0972931
NAc	LDB2	chr4:clu_4675_NA	chr4:16504496-16510164	10.9775	6	0.00123387	0.082431	0.0495752
NAc	LDB2	chr4:clu_4675_NA	chr4:16504496-16510164	10.9775	6	0.00123387	0.082431	-0.0406351
NAc	ADGRA3	chr4:clu_4719_NA	chr4:22348446-22390711	13.3532	4	2.27885e-05	0.00775128	-0.0352689
NAc	ADGRA3	chr4:clu_4719_NA	chr4:22348446-22390711	13.3532	4	2.27885e-05	0.00775128	0.0609068
NAc	FIP1L1,RP11-231C18.3	chr4:clu_5007_NA	chr4:54257306-54265903	13.091	8	0.000977573	0.0727826	0.0512284
NAc	FIP1L1,RP11-231C18.3	chr4:clu_5007_NA	chr4:54257306-54265903	13.091	8	0.000977573	0.0727826	-0.117888
NAc	FIP1L1,RP11-231C18.3	chr4:clu_5007_NA	chr4:54257306-54265903	13.091	8	0.000977573	0.0727826	0.0606898
NAc	TMEM165	chr4:clu_5024_NA	chr4:56262563-56290705	22.8093	12	8.07054e-06	0.00402619	-0.0323552
NAc	TMEM165	chr4:clu_5024_NA	chr4:56262563-56290705	22.8093	12	8.07054e-06	0.00402619	-0.0465988
NAc	TMEM165	chr4:clu_5024_NA	chr4:56262563-56290705	22.8093	12	8.07054e-06	0.00402619	0.0485309
NAc	BMP2K	chr4:clu_5240_NA	chr4:79793914-79831764	12.9577	5	9.26692e-05	0.0196286	0.046214
NAc	BMP2K	chr4:clu_5240_NA	chr4:79793914-79831764	12.9577	5	9.26692e-05	0.0196286	-0.0287494
NAc	KLHL8	chr4:clu_5358_NA	chr4:88099754-88116476	10.0804	4	0.000464194	0.0500456	0.049615
NAc	KLHL8	chr4:clu_5358_NA	chr4:88099754-88116476	10.0804	4	0.000464194	0.0500456	-0.0285844
NAc	METTL14	chr4:clu_5689_NA	chr4:119625206-119631153	7.75942	3	0.00142289	0.0893774	0.111571
NAc	METTL14	chr4:clu_5689_NA	chr4:119625206-119631153	7.75942	3	0.00142289	0.0893774	-0.107888
NAc	KIAA1109	chr4:clu_5760_NA	chr4:123195591-123200930	11.2114	5	0.000435047	0.0479324	-0.0256364
NAc	KIAA1109	chr4:clu_5760_NA	chr4:123195591-123200930	11.2114	5	0.000435047	0.0479324	0.0433506
NAc	USP38	chr4:clu_5899_NA	chr4:144116998-144124561	10.616	2	2.45207e-05	0.00817078	-0.0333012
NAc	USP38	chr4:clu_5899_NA	chr4:144116998-144124561	10.616	2	2.45207e-05	0.00817078	0.0329528
NAc	GAB1,SMARCA5	chr4:clu_5905_NA	chr4:144387378-144438508	7.37598	1	0.00012262	0.0224865	0.0878209
NAc	GAB1,SMARCA5	chr4:clu_5905_NA	chr4:144387378-144438508	7.37598	1	0.00012262	0.0224865	-0.0878209
NAc	TRIM2	chr4:clu_6021_NA	chr4:154197282-154236637	15.1105	10	0.000788181	0.0658183	0.0259113
NAc	NEK1	chr4:clu_6183_NA	chr4:170509886-170511877	7.52574	2	0.000539027	0.0533637	-0.0317798
NAc	NEK1	chr4:clu_6183_NA	chr4:170509886-170511877	7.52574	2	0.000539027	0.0533637	0.03684
NAc	NEK1	chr4:clu_6188_NA	chr4:170483347-170501993	11.3159	3	4.81864e-05	0.0127326	-0.0315801
NAc	NEK1	chr4:clu_6188_NA	chr4:170483347-170501993	11.3159	3	4.81864e-05	0.0127326	0.0377901
NAc	PDCD6	chr5:clu_13868_NA	chr5:271936-304292	8.03941	3	0.00109256	0.0779168	-0.0772532
NAc	PDCD6	chr5:clu_13868_NA	chr5:271936-304292	8.03941	3	0.00109256	0.0779168	0.0597964
NAc	LPCAT1	chr5:clu_13911_NA	chr5:1489973-1501576	7.03396	2	0.000881434	0.0689031	0.118177
NAc	LPCAT1	chr5:clu_13911_NA	chr5:1489973-1501576	7.03396	2	0.000881434	0.0689031	-0.138603
NAc	CTNND2	chr5:clu_13988_NA	chr5:11236935-11364808	10.0086	2	4.50114e-05	0.0121771	0.0783141
NAc	CTNND2	chr5:clu_13988_NA	chr5:11236935-11364808	10.0086	2	4.50114e-05	0.0121771	-0.0816986
NAc	TRIO	chr5:clu_13998_NA	chr5:14297372-14316622	9.59931	4	0.000718373	0.0630659	0.0759958
NAc	TRIO	chr5:clu_13998_NA	chr5:14297372-14316622	9.59931	4	0.000718373	0.0630659	-0.0650874
NAc	MTMR12	chr5:clu_14077_NA	chr5:32230453-32239107	18.8194	8	8.77774e-06	0.00419683	-0.0303787
NAc	GPBP1	chr5:clu_14355_NA	chr5:56527148-56542127	14.2942	5	2.79207e-05	0.00887099	-0.0268865
NAc	GPBP1	chr5:clu_14355_NA	chr5:56527148-56542127	14.2942	5	2.79207e-05	0.00887099	0.0581727
NAc	GPBP1	chr5:clu_14355_NA	chr5:56527148-56542127	14.2942	5	2.79207e-05	0.00887099	-0.0340775
NAc	HMGCR	chr5:clu_14624_NA	chr5:74650522-74651190	8.26969	2	0.000256166	0.0353509	0.0262826
NAc	HMGCR	chr5:clu_14624_NA	chr5:74650522-74651190	8.26969	2	0.000256166	0.0353509	-0.0324639
NAc	AP3B1	chr5:clu_14674_NA	chr5:77335098-77385217	6.64876	1	0.000265759	0.0359485	-0.0431232
NAc	AP3B1	chr5:clu_14674_NA	chr5:77335098-77385217	6.64876	1	0.000265759	0.0359485	0.0431232
NAc	TTC37	chr5:clu_14920_NA	chr5:94842696-94845298	13.9777	3	3.71109e-06	0.00232699	-0.0269156
NAc	APC	chr5:clu_15068_NA	chr5:112043346-112102023	15.9837	11	0.000771955	0.0649013	-0.0317733
NAc	APC	chr5:clu_15068_NA	chr5:112043346-112102023	15.9837	11	0.000771955	0.0649013	0.0337044
NAc	RAD50,AC116366.7	chr5:clu_15297_NA	chr5:131927726-131930796	10.9917	3	6.5755e-05	0.0153724	-0.056012
NAc	RAD50,AC116366.7	chr5:clu_15297_NA	chr5:131927726-131930796	10.9917	3	6.5755e-05	0.0153724	0.0667687
NAc	PCDHA1,PCDHA2,PCDHA3,KNOWN,PCDHA5,PCDHA8,PCDHA9,PCDHA10,PCDHA11,PCDHA12,PCDHA13,PCDHAC1,PCDHAC2	chr5:clu_15507_NA	chr5:140168269-140358534	19.1214	15	0.000830678	0.0672476	-0.0303854
NAc	PCDHA1,PCDHA2,PCDHA3,KNOWN,PCDHA5,PCDHA8,PCDHA9,PCDHA10,PCDHA11,PCDHA12,PCDHA13,PCDHAC1,PCDHAC2	chr5:clu_15507_NA	chr5:140168269-140358534	19.1214	15	0.000830678	0.0672476	-0.0258535
NAc	PCDHA1,PCDHA2,PCDHA3,KNOWN,PCDHA5,PCDHA8,PCDHA9,PCDHA10,PCDHA11,PCDHA12,PCDHA13,PCDHAC1,PCDHAC2	chr5:clu_15507_NA	chr5:140168269-140358534	19.1214	15	0.000830678	0.0672476	0.0313705
NAc	PCDHA1,PCDHA2,PCDHA3,KNOWN,PCDHA5,PCDHA8,PCDHA9,PCDHA10,PCDHA11,PCDHA12,PCDHA13,PCDHAC1,PCDHAC2	chr5:clu_15507_NA	chr5:140168269-140358534	19.1214	15	0.000830678	0.0672476	0.102226
NAc	ABLIM3	chr5:clu_15641_NA	chr5:148619451-148624444	10.0221	5	0.00122606	0.0821099	0.0410337
NAc	ABLIM3	chr5:clu_15641_NA	chr5:148619451-148624444	10.0221	5	0.00122606	0.0821099	-0.0441047
NAc	ABLIM3	chr5:clu_15641_NA	chr5:148619451-148624444	10.0221	5	0.00122606	0.0821099	0.0308171
NAc	ABLIM3	chr5:clu_15641_NA	chr5:148619451-148624444	10.0221	5	0.00122606	0.0821099	-0.0383957
NAc	NDST1	chr5:clu_15689_NA	chr5:149865566-149907366	16.9847	9	9.04353e-05	0.019331	-0.0600827
NAc	NDST1	chr5:clu_15689_NA	chr5:149865566-149907366	16.9847	9	9.04353e-05	0.019331	-0.0626486
NAc	NDST1	chr5:clu_15689_NA	chr5:149865566-149907366	16.9847	9	9.04353e-05	0.019331	0.121617
NAc	CNOT8	chr5:clu_15753_NA	chr5:154238328-154251290	14.9655	11	0.00162456	0.0962332	-0.034848
NAc	CNOT8	chr5:clu_15753_NA	chr5:154238328-154251290	14.9655	11	0.00162456	0.0962332	0.0600375
NAc	ATP10B	chr5:clu_15813_NA	chr5:160144041-160278948	10.9559	6	0.00125625	0.082801	0.051502
NAc	ATP10B	chr5:clu_15813_NA	chr5:160144041-160278948	10.9559	6	0.00125625	0.082801	-0.0443875
NAc	CTC-340A15.2	chr5:clu_15839_NA	chr5:163724202-164149771	33.0612	27	3.93743e-05	0.0112533	-0.0854921
NAc	CTC-340A15.2	chr5:clu_15839_NA	chr5:163724202-164149771	33.0612	27	3.93743e-05	0.0112533	0.0993404
NAc	RARS	chr5:clu_15867_NA	chr5:167919852-167921555	7.67165	3	0.00154558	0.0930206	0.045678
NAc	RARS	chr5:clu_15867_NA	chr5:167919852-167921555	7.67165	3	0.00154558	0.0930206	-0.0549294
NAc	ID4	chr6:clu_40731_NA	chr6:19838426-19839441	11.725	2	8.0894e-06	0.00402619	-0.141302
NAc	ID4	chr6:clu_40731_NA	chr6:19838426-19839441	11.725	2	8.0894e-06	0.00402619	0.139495
NAc	GABBR1	chr6:clu_40883_NA	chr6:29599376-29600627	8.69283	2	0.000167784	0.0272091	0.0978882
NAc	GABBR1	chr6:clu_40883_NA	chr6:29599376-29600627	8.69283	2	0.000167784	0.0272091	-0.0982229
NAc	HLA-A,HLA-J	chr6:clu_40895_NA	chr6:29912393-29976922	6.39282	2	0.00167353	0.0968801	-0.0379662
NAc	C6orf1	chr6:clu_41171_NA	chr6:34214926-34215518	9.75213	4	0.00062546	0.0595472	-0.0305759
NAc	PAQR8,EFHC1	chr6:clu_41545_NA	chr6:52227047-52288744	26.019	7	5.73866e-09	9.22372e-06	-0.170936
NAc	PAQR8,EFHC1	chr6:clu_41545_NA	chr6:52227047-52288744	26.019	7	5.73866e-09	9.22372e-06	0.165249
NAc	DST	chr6:clu_41605_NA	chr6:56465019-56475237	14.2475	8	0.000388721	0.044588	-0.0445962
NAc	DST	chr6:clu_41605_NA	chr6:56465019-56475237	14.2475	8	0.000388721	0.044588	0.0277216
NAc	PNISR	chr6:clu_42058_NA	chr6:99858801-99860427	9.30954	2	9.05565e-05	0.019331	-0.0710239
NAc	PNISR	chr6:clu_42058_NA	chr6:99858801-99860427	9.30954	2	9.05565e-05	0.019331	0.049438
NAc	DSE	chr6:clu_42302_NA	chr6:116747990-116756750	9.1697	3	0.000374347	0.0442799	-0.101544
NAc	DSE	chr6:clu_42302_NA	chr6:116747990-116756750	9.1697	3	0.000374347	0.0442799	0.0711653
NAc	HDDC2	chr6:clu_42390_NA	chr6:125598386-125613987	5.95057	1	0.000560997	0.0551392	0.0425005
NAc	HDDC2	chr6:clu_42390_NA	chr6:125598386-125613987	5.95057	1	0.000560997	0.0551392	-0.0425005
NAc	SYNJ2	chr6:clu_42855_NA	chr6:158476060-158484823	19.9227	9	8.10424e-06	0.00402619	-0.0628242
NAc	SYNJ2	chr6:clu_42855_NA	chr6:158476060-158484823	19.9227	9	8.10424e-06	0.00402619	-0.0526088
NAc	SYNJ2	chr6:clu_42855_NA	chr6:158476060-158484823	19.9227	9	8.10424e-06	0.00402619	0.025275
NAc	SYNJ2	chr6:clu_42855_NA	chr6:158476060-158484823	19.9227	9	8.10424e-06	0.00402619	0.0412462
NAc	WDR27	chr6:clu_43008_NA	chr6:170089108-170101647	11.1023	5	0.000478727	0.0502176	0.0830654
NAc	WDR27	chr6:clu_43008_NA	chr6:170089108-170101647	11.1023	5	0.000478727	0.0502176	-0.0556797
NAc	TNRC18	chr7:clu_6487_NA	chr7:5399200-5401528	9.13259	2	0.000108085	0.0210951	0.028158
NAc	TNRC18	chr7:clu_6487_NA	chr7:5399200-5401528	9.13259	2	0.000108085	0.0210951	0.131715
NAc	TNRC18	chr7:clu_6487_NA	chr7:5399200-5401528	9.13259	2	0.000108085	0.0210951	-0.159873
NAc	MRPS24,URGCP-MRPS24,URGCP	chr7:clu_6982_NA	chr7:43908975-43921258	22.3609	5	1.65267e-08	2.15036e-05	-0.223099
NAc	MRPS24,URGCP-MRPS24,URGCP	chr7:clu_6982_NA	chr7:43908975-43921258	22.3609	5	1.65267e-08	2.15036e-05	0.222752
NAc	TPST1,GS1-124K5.4	chr7:clu_7213_NA	chr7:65751696-65960242	20.9959	16	0.000395711	0.0447149	-0.0363397
NAc	TYW1	chr7:clu_7242_NA	chr7:66474671-66482840	12.6198	2	3.30579e-06	0.00215065	0.0676534
NAc	TYW1	chr7:clu_7242_NA	chr7:66474671-66482840	12.6198	2	3.30579e-06	0.00215065	0.0499835
NAc	TYW1	chr7:clu_7242_NA	chr7:66474671-66482840	12.6198	2	3.30579e-06	0.00215065	-0.117637
NAc	GTF2I	chr7:clu_7349_NA	chr7:74125440-74131214	14.144	5	3.19701e-05	0.00981518	-0.0374148
NAc	GTF2I	chr7:clu_7349_NA	chr7:74125440-74131214	14.144	5	3.19701e-05	0.00981518	0.0300364
NAc	RUNDC3B	chr7:clu_7526_NA	chr7:87258261-87280138	10.8092	2	2.02133e-05	0.00717283	-0.0946331
NAc	RUNDC3B	chr7:clu_7526_NA	chr7:87258261-87280138	10.8092	2	2.02133e-05	0.00717283	0.183687
NAc	RUNDC3B	chr7:clu_7526_NA	chr7:87258261-87280138	10.8092	2	2.02133e-05	0.00717283	-0.0890536
NAc	STEAP2	chr7:clu_7557_NA	chr7:89841359-89854364	8.90349	4	0.00134603	0.0859754	-0.072288
NAc	STEAP2	chr7:clu_7557_NA	chr7:89841359-89854364	8.90349	4	0.00134603	0.0859754	-0.116508
NAc	STEAP2	chr7:clu_7557_NA	chr7:89841359-89854364	8.90349	4	0.00134603	0.0859754	0.211449
NAc	PPP1R9A	chr7:clu_7669_NA	chr7:94536633-94539210	10.7203	6	0.00152836	0.0928204	0.0365223
NAc	PPP1R9A	chr7:clu_7669_NA	chr7:94536633-94539210	10.7203	6	0.00152836	0.0928204	0.0351189
NAc	PPP1R9A	chr7:clu_7669_NA	chr7:94536633-94539210	10.7203	6	0.00152836	0.0928204	-0.0417115
NAc	TMEM130	chr7:clu_7730_NA	chr7:98453806-98467400	32.5818	4	2.37696e-13	2.16494e-09	0.057428
NAc	TMEM130	chr7:clu_7730_NA	chr7:98453806-98467400	32.5818	4	2.37696e-13	2.16494e-09	0.0432965
NAc	TMEM130	chr7:clu_7730_NA	chr7:98453806-98467400	32.5818	4	2.37696e-13	2.16494e-09	-0.0940321
NAc	LAMB1	chr7:clu_8037_NA	chr7:107569650-107571801	7.59027	2	0.000505345	0.0513469	-0.0294611
NAc	LAMB1	chr7:clu_8037_NA	chr7:107569650-107571801	7.59027	2	0.000505345	0.0513469	0.0396192
NAc	HILPDA,RP11-155G14.6,RP11-155G14.5,RP11-212P7.3,METTL2B	chr7:clu_8208_NA	chr7:128095963-128119212	26.3123	12	4.80375e-07	0.000423412	0.175346
NAc	HILPDA,RP11-155G14.6,RP11-155G14.5,RP11-212P7.3,METTL2B	chr7:clu_8208_NA	chr7:128095963-128119212	26.3123	12	4.80375e-07	0.000423412	0.049246
NAc	HILPDA,RP11-155G14.6,RP11-155G14.5,RP11-212P7.3,METTL2B	chr7:clu_8208_NA	chr7:128095963-128119212	26.3123	12	4.80375e-07	0.000423412	-0.138181
NAc	HILPDA,RP11-155G14.6,RP11-155G14.5,RP11-212P7.3,METTL2B	chr7:clu_8208_NA	chr7:128095963-128119212	26.3123	12	4.80375e-07	0.000423412	-0.140976
NAc	AGAP3	chr7:clu_8603_NA	chr7:150815719-150820881	29.9394	6	4.76336e-11	1.85935e-07	-0.146441
NAc	AGAP3	chr7:clu_8603_NA	chr7:150815719-150820881	29.9394	6	4.76336e-11	1.85935e-07	0.0930835
NAc	AGAP3	chr7:clu_8605_NA	chr7:150831655-150838985	8.81873	4	0.00145255	0.0904086	-0.0400116
NAc	AGAP3	chr7:clu_8605_NA	chr7:150831655-150838985	8.81873	4	0.00145255	0.0904086	-0.125909
NAc	AGAP3	chr7:clu_8605_NA	chr7:150831655-150838985	8.81873	4	0.00145255	0.0904086	0.0371989
NAc	AGAP3	chr7:clu_8605_NA	chr7:150831655-150838985	8.81873	4	0.00145255	0.0904086	0.137923
NAc	SMARCD3	chr7:clu_8616_NA	chr7:150940787-150972200	13.4161	3	6.3842e-06	0.00348903	0.0955022
NAc	SMARCD3	chr7:clu_8616_NA	chr7:150940787-150972200	13.4161	3	6.3842e-06	0.00348903	0.0265393
NAc	SMARCD3	chr7:clu_8616_NA	chr7:150940787-150972200	13.4161	3	6.3842e-06	0.00348903	-0.125162
NAc	PTPRN2	chr7:clu_8722_NA	chr7:157691429-157926369	14.0602	8	0.000451878	0.0491917	0.0436364
NAc	PTPRN2	chr7:clu_8722_NA	chr7:157691429-157926369	14.0602	8	0.000451878	0.0491917	0.0255597
NAc	PTPRN2	chr7:clu_8722_NA	chr7:157691429-157926369	14.0602	8	0.000451878	0.0491917	-0.0476988
NAc	NA	chr7:clu_8748_NA	chr7:158707773-158708941	21.7973	17	0.000392938	0.0447149	0.050663
NAc	NA	chr7:clu_8748_NA	chr7:158707773-158708941	21.7973	17	0.000392938	0.0447149	0.0311455
NAc	NA	chr7:clu_8748_NA	chr7:158707773-158708941	21.7973	17	0.000392938	0.0447149	0.0567076
NAc	NA	chr7:clu_8748_NA	chr7:158707773-158708941	21.7973	17	0.000392938	0.0447149	0.0618112
NAc	NA	chr7:clu_8748_NA	chr7:158707773-158708941	21.7973	17	0.000392938	0.0447149	-0.0381369
NAc	NA	chr7:clu_8748_NA	chr7:158707773-158708941	21.7973	17	0.000392938	0.0447149	0.0588203
NAc	NA	chr7:clu_8748_NA	chr7:158707773-158708941	21.7973	17	0.000392938	0.0447149	0.151726
NAc	NA	chr7:clu_8748_NA	chr7:158707773-158708941	21.7973	17	0.000392938	0.0447149	-0.0264897
NAc	NA	chr7:clu_8748_NA	chr7:158707773-158708941	21.7973	17	0.000392938	0.0447149	0.0316809
NAc	NA	chr7:clu_8748_NA	chr7:158707773-158708941	21.7973	17	0.000392938	0.0447149	-0.338606
NAc	NA	chr7:clu_8748_NA	chr7:158707773-158708941	21.7973	17	0.000392938	0.0447149	-0.0550655
NAc	NA	chr7:clu_8748_NA	chr7:158707773-158708941	21.7973	17	0.000392938	0.0447149	-0.032691
NAc	NA	chr7:clu_8748_NA	chr7:158707773-158708941	21.7973	17	0.000392938	0.0447149	0.0708807
NAc	DLGAP2	chr8:clu_16159_NA	chr8:1208883-1513849	11.3517	6	0.000902158	0.0696226	0.0547177
NAc	DLGAP2	chr8:clu_16159_NA	chr8:1208883-1513849	11.3517	6	0.000902158	0.0696226	-0.0563184
NAc	DLGAP2	chr8:clu_16159_NA	chr8:1208883-1513849	11.3517	6	0.000902158	0.0696226	0.0373671
NAc	DLGAP2	chr8:clu_16159_NA	chr8:1208883-1513849	11.3517	6	0.000902158	0.0696226	-0.0626511
NAc	CTD-2135J3.4,PINX1	chr8:clu_16284_NA	chr8:10689253-10692176	6.8205	2	0.00109117	0.0779168	-0.0370569
NAc	CTD-2135J3.4,PINX1	chr8:clu_16284_NA	chr8:10689253-10692176	6.8205	2	0.00109117	0.0779168	-0.0407739
NAc	CTD-2135J3.4,PINX1	chr8:clu_16284_NA	chr8:10689253-10692176	6.8205	2	0.00109117	0.0779168	0.0778308
NAc	ZDHHC2	chr8:clu_16357_NA	chr8:17067567-17077765	10.4469	5	0.00084834	0.0681766	-0.028617
NAc	XPO7,NPM2	chr8:clu_16438_NA	chr8:21861541-21882947	16.089	10	0.000373991	0.0442799	0.0948506
NAc	XPO7,NPM2	chr8:clu_16438_NA	chr8:21861541-21882947	16.089	10	0.000373991	0.0442799	-0.0672715
NAc	XPO7,NPM2	chr8:clu_16438_NA	chr8:21861541-21882947	16.089	10	0.000373991	0.0442799	-0.0464861
NAc	XPO7,NPM2	chr8:clu_16438_NA	chr8:21861541-21882947	16.089	10	0.000373991	0.0442799	0.0419562
NAc	KIF13B	chr8:clu_16620_NA	chr8:28981009-28983999	8.48297	2	0.000206963	0.0307198	-0.066673
NAc	KIF13B	chr8:clu_16620_NA	chr8:28981009-28983999	8.48297	2	0.000206963	0.0307198	0.0732307
NAc	UBXN8	chr8:clu_16651_NA	chr8:30610622-30614282	10.697	4	0.000264498	0.0359485	-0.0850213
NAc	UBXN8	chr8:clu_16651_NA	chr8:30610622-30614282	10.697	4	0.000264498	0.0359485	0.0493882
NAc	RP11-598P20.5,FNTA	chr8:clu_16810_NA	chr8:42911399-42924698	13.2543	7	0.000408403	0.0457344	0.0266779
NAc	RGS20	chr8:clu_16882_NA	chr8:54792598-54859225	15.0344	9	0.000427039	0.0474473	-0.0798132
NAc	RGS20	chr8:clu_16882_NA	chr8:54792598-54859225	15.0344	9	0.000427039	0.0474473	0.0503273
NAc	ZFHX4	chr8:clu_17112_NA	chr8:77593855-77616278	7.60528	2	0.000497814	0.0511364	0.0663493
NAc	ZFHX4	chr8:clu_17112_NA	chr8:77593855-77616278	7.60528	2	0.000497814	0.0511364	-0.0716725
NAc	ANKRD46	chr8:clu_17388_NA	chr8:101545539-101571939	13.1315	3	8.40164e-06	0.0040994	0.0497246
NAc	ANKRD46	chr8:clu_17388_NA	chr8:101545539-101571939	13.1315	3	8.40164e-06	0.0040994	-0.0652447
NAc	BAALC	chr8:clu_17434_NA	chr8:104153285-104258810	31.4932	8	1.20548e-10	3.04605e-07	-0.0614847
NAc	BAALC	chr8:clu_17434_NA	chr8:104153285-104258810	31.4932	8	1.20548e-10	3.04605e-07	-0.0277538
NAc	BAALC	chr8:clu_17434_NA	chr8:104153285-104258810	31.4932	8	1.20548e-10	3.04605e-07	0.0904635
NAc	SYBU	chr8:clu_17492_NA	chr8:110631268-110704359	23.9174	13	6.97926e-06	0.00366733	0.121156
NAc	SYBU	chr8:clu_17492_NA	chr8:110631268-110704359	23.9174	13	6.97926e-06	0.00366733	-0.0420114
NAc	SYBU	chr8:clu_17492_NA	chr8:110631268-110704359	23.9174	13	6.97926e-06	0.00366733	-0.026136
NAc	SYBU	chr8:clu_17492_NA	chr8:110631268-110704359	23.9174	13	6.97926e-06	0.00366733	-0.0254898
NAc	FAM91A1	chr8:clu_17594_NA	chr8:124799990-124801853	9.83647	2	5.34655e-05	0.0136532	0.0596537
NAc	FAM91A1	chr8:clu_17594_NA	chr8:124799990-124801853	9.83647	2	5.34655e-05	0.0136532	-0.104912
NAc	FAM91A1	chr8:clu_17594_NA	chr8:124799990-124801853	9.83647	2	5.34655e-05	0.0136532	0.045258
NAc	WASHC5	chr8:clu_17613_NA	chr8:126095500-126103857	12.1859	3	2.0891e-05	0.00731827	0.144016
NAc	WASHC5	chr8:clu_17613_NA	chr8:126095500-126103857	12.1859	3	2.0891e-05	0.00731827	-0.136804
NAc	KHDRBS3	chr8:clu_17668_NA	chr8:136470197-136533480	7.15038	2	0.000784569	0.0657594	-0.0344931
NAc	KHDRBS3	chr8:clu_17668_NA	chr8:136470197-136533480	7.15038	2	0.000784569	0.0657594	0.0397844
NAc	GRINA	chr8:clu_17808_NA	chr8:145064367-145065860	17.9785	2	1.55609e-08	2.12593e-05	-0.0931255
NAc	GRINA	chr8:clu_17808_NA	chr8:145064367-145065860	17.9785	2	1.55609e-08	2.12593e-05	-0.0303935
NAc	GRINA	chr8:clu_17808_NA	chr8:145064367-145065860	17.9785	2	1.55609e-08	2.12593e-05	0.123519
NAc	CYC1	chr8:clu_17819_NA	chr8:145150131-145151027	16.2111	3	4.26387e-07	0.000388354	-0.113047
NAc	CYC1	chr8:clu_17819_NA	chr8:145150131-145151027	16.2111	3	4.26387e-07	0.000388354	0.110118
NAc	CLTA	chr9:clu_33793_NA	chr9:36190908-36204065	14.4558	3	2.33718e-06	0.00159653	-0.0767613
NAc	CLTA	chr9:clu_33793_NA	chr9:36190908-36204065	14.4558	3	2.33718e-06	0.00159653	0.079704
NAc	NTRK2	chr9:clu_34179_NA	chr9:87283700-87285292	31.7803	8	9.28823e-11	2.81991e-07	0.036896
NAc	NTRK2	chr9:clu_34179_NA	chr9:87283700-87285292	31.7803	8	9.28823e-11	2.81991e-07	0.0830886
NAc	NTRK2	chr9:clu_34179_NA	chr9:87283700-87285292	31.7803	8	9.28823e-11	2.81991e-07	-0.125998
NAc	C9orf3	chr9:clu_34347_NA	chr9:97522862-97555047	9.81946	5	0.00146045	0.0906941	-0.176279
NAc	C9orf3	chr9:clu_34347_NA	chr9:97522862-97555047	9.81946	5	0.00146045	0.0906941	0.0596769
NAc	C9orf3	chr9:clu_34347_NA	chr9:97522862-97555047	9.81946	5	0.00146045	0.0906941	0.111483
NAc	TSTD2	chr9:clu_34431_NA	chr9:100373981-100387963	8.53085	2	0.000197288	0.0306289	0.0289648
NAc	TSTD2	chr9:clu_34431_NA	chr9:100373981-100387963	8.53085	2	0.000197288	0.0306289	0.0319085
NAc	TSTD2	chr9:clu_34431_NA	chr9:100373981-100387963	8.53085	2	0.000197288	0.0306289	-0.0608733
NAc	ABCA1	chr9:clu_34528_NA	chr9:107548671-107550201	13.9163	3	3.93801e-06	0.00237386	0.0452725
NAc	ABCA1	chr9:clu_34528_NA	chr9:107548671-107550201	13.9163	3	3.93801e-06	0.00237386	-0.0267475
NAc	GAPVD1	chr9:clu_34885_NA	chr9:128094908-128099297	7.11123	2	0.000815892	0.0667468	-0.12203
NAc	GAPVD1	chr9:clu_34885_NA	chr9:128094908-128099297	7.11123	2	0.000815892	0.0667468	0.103285
NAc	CERCAM	chr9:clu_34994_NA	chr9:131183353-131185147	10.9096	5	0.000566703	0.0555004	-0.172126
NAc	CERCAM	chr9:clu_34994_NA	chr9:131183353-131185147	10.9096	5	0.000566703	0.0555004	0.0453826
NAc	CERCAM	chr9:clu_34994_NA	chr9:131183353-131185147	10.9096	5	0.000566703	0.0555004	0.0437298
NAc	CERCAM	chr9:clu_34994_NA	chr9:131183353-131185147	10.9096	5	0.000566703	0.0555004	0.0671642
NAc	CERCAM	chr9:clu_35000_NA	chr9:131191315-131197932	14.3505	7	0.000164025	0.0269989	0.0634878
NAc	CERCAM	chr9:clu_35000_NA	chr9:131191315-131197932	14.3505	7	0.000164025	0.0269989	-0.0788989
NAc	LRRC8A	chr9:clu_35037_NA	chr9:131644529-131669436	17.7354	11	0.000207165	0.0307198	-0.171611
NAc	LRRC8A	chr9:clu_35037_NA	chr9:131644529-131669436	17.7354	11	0.000207165	0.0307198	0.11188
NAc	GPR107	chr9:clu_35086_NA	chr9:132816352-132841909	8.64411	4	0.00169891	0.0976916	-0.0759125
NAc	GPR107	chr9:clu_35086_NA	chr9:132816352-132841909	8.64411	4	0.00169891	0.0976916	0.0820794
NAc	SURF1	chr9:clu_35197_NA	chr9:136221596-136223276	7.63845	3	0.00159468	0.0951376	0.0828056
NAc	SURF1	chr9:clu_35197_NA	chr9:136221596-136223276	7.63845	3	0.00159468	0.0951376	-0.0615804
NAc	PTGDS,RP11-229P13.28	chr9:clu_35324_NA	chr9:139872144-139874398	20.1463	3	9.23679e-09	1.40215e-05	-0.0688474
NAc	PTGDS,RP11-229P13.28	chr9:clu_35324_NA	chr9:139872144-139874398	20.1463	3	9.23679e-09	1.40215e-05	0.0712018
NAc	PNCK	chrX:clu_10142_NA	chrX:152935581-152936199	8.03737	3	0.00109467	0.0779168	-0.0519791
NAc	PNCK	chrX:clu_10142_NA	chrX:152935581-152936199	8.03737	3	0.00109467	0.0779168	0.0460193
NAc	FAM3A	chrX:clu_10227_NA	chrX:153735821-153736620	8.27634	3	0.000873366	0.0687719	-0.0442565
NAc	FAM3A	chrX:clu_10227_NA	chrX:153735821-153736620	8.27634	3	0.000873366	0.0687719	0.110896
NAc	FAM3A	chrX:clu_10227_NA	chrX:153735821-153736620	8.27634	3	0.000873366	0.0687719	-0.0901672
NAc	PHKA2	chrX:clu_8928_NA	chrX:18959793-18963196	6.50798	2	0.0014915	0.0911715	0.0327096
NAc	POLA1	chrX:clu_9004_NA	chrX:24734571-24735407	7.87543	3	0.00127545	0.0829769	-0.0646164
NAc	POLA1	chrX:clu_9004_NA	chrX:24734571-24735407	7.87543	3	0.00127545	0.0829769	0.0322519
NAc	POLA1	chrX:clu_9004_NA	chrX:24734571-24735407	7.87543	3	0.00127545	0.0829769	0.0553085
NAc	RBM10	chrX:clu_9168_NA	chrX:47028897-47032527	7.05586	2	0.000862339	0.0686955	-0.143111
NAc	RBM10	chrX:clu_9168_NA	chrX:47028897-47032527	7.05586	2	0.000862339	0.0686955	0.131945
NAc	KDM5C	chrX:clu_9298_NA	chrX:53247148-53250021	7.65055	2	0.000475782	0.0502176	-0.0271591
NAc	KDM5C	chrX:clu_9298_NA	chrX:53247148-53250021	7.65055	2	0.000475782	0.0502176	0.0265691
NAc	NLGN3	chrX:clu_9454_NA	chrX:70368056-70375064	13.0745	5	8.34872e-05	0.0186196	-0.0298109
NAc	NLGN3	chrX:clu_9454_NA	chrX:70368056-70375064	13.0745	5	8.34872e-05	0.0186196	0.0914853
NAc	NLGN3	chrX:clu_9454_NA	chrX:70368056-70375064	13.0745	5	8.34872e-05	0.0186196	-0.0408782
NAc	CHIC1	chrX:clu_9496_NA	chrX:72899217-72900790	6.55545	2	0.00142235	0.0893774	-0.0838548
NAc	CHIC1	chrX:clu_9496_NA	chrX:72899217-72900790	6.55545	2	0.00142235	0.0893774	0.0605709
NAc	XIAP	chrX:clu_9890_NA	chrX:122993755-123022469	14.2434	8	0.000390007	0.044588	-0.0293593
NAc	XIAP	chrX:clu_9890_NA	chrX:122993755-123022469	14.2434	8	0.000390007	0.044588	0.0277454
NAc	XIAP	chrX:clu_9890_NA	chrX:122993755-123022469	14.2434	8	0.000390007	0.044588	0.0558272
NAc	XIAP	chrX:clu_9890_NA	chrX:122993755-123022469	14.2434	8	0.000390007	0.044588	-0.0716229
Midbrain	SCNN1D	chr1:clu_22061_NA	chr1:1223417-1225857	6.21946	1	0.000420478	0.0633676	-0.17894
Midbrain	SCNN1D	chr1:clu_22061_NA	chr1:1223417-1225857	6.21946	1	0.000420478	0.0633676	0.17894
Midbrain	SLC35E2B,RP1-283E3.8,SLC35E2,CDK11A	chr1:clu_22146_NA	chr1:1608285-1666129	14.1635	9	0.000840934	0.0842154	-0.100284
Midbrain	SLC35E2B,RP1-283E3.8,SLC35E2,CDK11A	chr1:clu_22146_NA	chr1:1608285-1666129	14.1635	9	0.000840934	0.0842154	-0.0398709
Midbrain	SLC35E2B,RP1-283E3.8,SLC35E2,CDK11A	chr1:clu_22146_NA	chr1:1608285-1666129	14.1635	9	0.000840934	0.0842154	0.0630486
Midbrain	SLC35E2B,RP1-283E3.8,SLC35E2,CDK11A	chr1:clu_22146_NA	chr1:1608285-1666129	14.1635	9	0.000840934	0.0842154	0.0663944
Midbrain	VPS13D	chr1:clu_22572_NA	chr1:12395884-12401840	8.84979	4	0.00141257	0.0991113	-0.0341821
Midbrain	VPS13D	chr1:clu_22572_NA	chr1:12395884-12401840	8.84979	4	0.00141257	0.0991113	0.102694
Midbrain	VPS13D	chr1:clu_22572_NA	chr1:12395884-12401840	8.84979	4	0.00141257	0.0991113	-0.063186
Midbrain	NBPF1,CROCCP2	chr1:clu_22670_NA	chr1:16935274-16952270	18.6906	13	0.000360954	0.0583636	-0.0377096
Midbrain	NBPF1,CROCCP2	chr1:clu_22670_NA	chr1:16935274-16952270	18.6906	13	0.000360954	0.0583636	0.0820159
Midbrain	LUZP1	chr1:clu_22920_NA	chr1:23435620-23504479	12.0158	7	0.00112487	0.0928767	-0.0969457
Midbrain	LUZP1	chr1:clu_22920_NA	chr1:23435620-23504479	12.0158	7	0.00112487	0.0928767	-0.0284397
Midbrain	LUZP1	chr1:clu_22920_NA	chr1:23435620-23504479	12.0158	7	0.00112487	0.0928767	0.0457947
Midbrain	LUZP1	chr1:clu_22920_NA	chr1:23435620-23504479	12.0158	7	0.00112487	0.0928767	0.0955141
Midbrain	NIPAL3	chr1:clu_22968_NA	chr1:24740264-24766662	15.9981	11	0.000763785	0.0803286	0.0293778
Midbrain	S100PBP	chr1:clu_23334_NA	chr1:33295668-33318680	13.077	6	0.000208402	0.0437782	-0.0559217
Midbrain	S100PBP	chr1:clu_23334_NA	chr1:33295668-33318680	13.077	6	0.000208402	0.0437782	-0.029815
Midbrain	S100PBP	chr1:clu_23334_NA	chr1:33295668-33318680	13.077	6	0.000208402	0.0437782	0.199287
Midbrain	S100PBP	chr1:clu_23334_NA	chr1:33295668-33318680	13.077	6	0.000208402	0.0437782	-0.0435363
Midbrain	S100PBP	chr1:clu_23334_NA	chr1:33295668-33318680	13.077	6	0.000208402	0.0437782	-0.050305
Midbrain	DAB1,OMA1	chr1:clu_24182_NA	chr1:58743344-58992933	16.9013	10	0.000199467	0.0433038	0.0690831
Midbrain	DAB1,OMA1	chr1:clu_24182_NA	chr1:58743344-58992933	16.9013	10	0.000199467	0.0433038	-0.0436902
Midbrain	LEPROT,LEPR	chr1:clu_24293_NA	chr1:65879992-65890986	9.12775	4	0.00109997	0.0925383	-0.0382298
Midbrain	LRRC8D,RP11-302M6.4,ZNF326	chr1:clu_24572_NA	chr1:90309341-90463669	12.8516	7	0.000568982	0.0717126	-0.077894
Midbrain	LRRC8D,RP11-302M6.4,ZNF326	chr1:clu_24572_NA	chr1:90309341-90463669	12.8516	7	0.000568982	0.0717126	0.0996529
Midbrain	SNX7	chr1:clu_24694_NA	chr1:99127467-99150441	8.02945	3	0.00110289	0.0925383	-0.0511515
Midbrain	SNX7	chr1:clu_24694_NA	chr1:99127467-99150441	8.02945	3	0.00110289	0.0925383	0.0912701
Midbrain	SNX7	chr1:clu_24694_NA	chr1:99127467-99150441	8.02945	3	0.00110289	0.0925383	-0.0470807
Midbrain	EXTL2	chr1:clu_24739_NA	chr1:101339986-101343032	7.17735	2	0.000763693	0.0803286	0.0585537
Midbrain	EXTL2	chr1:clu_24739_NA	chr1:101339986-101343032	7.17735	2	0.000763693	0.0803286	-0.0733943
Midbrain	RP11-421L21.3	chr1:clu_24746_NA	chr1:101491617-101552408	20.8919	17	0.000720586	0.0789925	-0.0260131
Midbrain	RP11-421L21.3	chr1:clu_24746_NA	chr1:101491617-101552408	20.8919	17	0.000720586	0.0789925	0.0268866
Midbrain	RPRD2	chr1:clu_25304_NA	chr1:150413499-150415707	7.7407	2	0.000434767	0.064273	0.133556
Midbrain	RPRD2	chr1:clu_25304_NA	chr1:150413499-150415707	7.7407	2	0.000434767	0.064273	-0.129402
Midbrain	ARNT	chr1:clu_25332_NA	chr1:150802441-150804294	5.92249	1	0.000578173	0.0721156	0.0260309
Midbrain	ARNT	chr1:clu_25332_NA	chr1:150802441-150804294	5.92249	1	0.000578173	0.0721156	-0.0260309
Midbrain	TPM3	chr1:clu_25526_NA	chr1:154143187-154145384	9.91941	5	0.00133981	0.0981002	-0.0268542
Midbrain	ADAR	chr1:clu_25567_NA	chr1:154575102-154600430	11.0477	4	0.000191847	0.0421808	0.0458886
Midbrain	ADAR	chr1:clu_25567_NA	chr1:154575102-154600430	11.0477	4	0.000191847	0.0421808	-0.07626
Midbrain	ADAR	chr1:clu_25567_NA	chr1:154575102-154600430	11.0477	4	0.000191847	0.0421808	0.042761
Midbrain	RP11-263K19.4,MTX1	chr1:clu_25625_NA	chr1:155170617-155180137	12.2858	4	6.13376e-05	0.0247302	0.0368427
Midbrain	RP11-263K19.4,MTX1	chr1:clu_25625_NA	chr1:155170617-155180137	12.2858	4	6.13376e-05	0.0247302	0.0503759
Midbrain	RP11-263K19.4,MTX1	chr1:clu_25625_NA	chr1:155170617-155180137	12.2858	4	6.13376e-05	0.0247302	-0.0739782
Midbrain	SLC25A44,PMF1-BGLAP,PMF1	chr1:clu_25759_NA	chr1:156164038-156203419	23.1956	17	0.000150686	0.0389838	0.0321533
Midbrain	SLC25A44,PMF1-BGLAP,PMF1	chr1:clu_25759_NA	chr1:156164038-156203419	23.1956	17	0.000150686	0.0389838	0.0280679
Midbrain	GLMP	chr1:clu_25775_NA	chr1:156264356-156265317	9.53742	4	0.000759778	0.0803286	-0.0410904
Midbrain	GLMP	chr1:clu_25775_NA	chr1:156264356-156265317	9.53742	4	0.000759778	0.0803286	0.0583985
Midbrain	GLMP	chr1:clu_25775_NA	chr1:156264356-156265317	9.53742	4	0.000759778	0.0803286	-0.0346075
Midbrain	CADM3	chr1:clu_25853_NA	chr1:159141643-159161730	10.2187	5	0.00103422	0.0898147	0.0300107
Midbrain	USP21	chr1:clu_25939_NA	chr1:161129468-161130410	9.30253	3	0.000329925	0.0575142	0.140155
Midbrain	USP21	chr1:clu_25939_NA	chr1:161129468-161130410	9.30253	3	0.000329925	0.0575142	-0.168663
Midbrain	FMO4	chr1:clu_26121_NA	chr1:171285466-171306495	15.9739	9	0.000203303	0.0435279	-0.0683686
Midbrain	FMO4	chr1:clu_26121_NA	chr1:171285466-171306495	15.9739	9	0.000203303	0.0435279	-0.0799932
Midbrain	FMO4	chr1:clu_26121_NA	chr1:171285466-171306495	15.9739	9	0.000203303	0.0435279	0.102652
Midbrain	FMO4	chr1:clu_26121_NA	chr1:171285466-171306495	15.9739	9	0.000203303	0.0435279	0.101324
Midbrain	KLHL20	chr1:clu_26164_NA	chr1:173685205-173720903	7.62823	2	0.000486523	0.0665135	0.031058
Midbrain	RABGAP1L	chr1:clu_26188_NA	chr1:174188322-174190110	5.12761	1	0.00136298	0.0984038	0.0520755
Midbrain	RABGAP1L	chr1:clu_26188_NA	chr1:174188322-174190110	5.12761	1	0.00136298	0.0984038	-0.0520755
Midbrain	ABL2	chr1:clu_26264_NA	chr1:179087899-179090730	9.0983	2	0.000111856	0.0329817	-0.0838842
Midbrain	ABL2	chr1:clu_26264_NA	chr1:179087899-179090730	9.0983	2	0.000111856	0.0329817	0.0866237
Midbrain	TOR1AIP1	chr1:clu_26277_NA	chr1:179853904-179873101	15.6101	8	0.000128377	0.0349742	-0.0659528
Midbrain	TOR1AIP1	chr1:clu_26277_NA	chr1:179853904-179873101	15.6101	8	0.000128377	0.0349742	0.0375813
Midbrain	TOR1AIP1	chr1:clu_26277_NA	chr1:179853904-179873101	15.6101	8	0.000128377	0.0349742	0.0339748
Midbrain	RASSF5	chr1:clu_26740_NA	chr1:206758016-206760158	7.39315	2	0.000615457	0.0736109	-0.108035
Midbrain	RASSF5	chr1:clu_26740_NA	chr1:206758016-206760158	7.39315	2	0.000615457	0.0736109	0.0934766
Midbrain	BATF3,NSL1	chr1:clu_26844_NA	chr1:212860321-212957705	25.0163	14	6.03021e-06	0.00875603	0.0288731
Midbrain	MARK1	chr1:clu_26918_NA	chr1:220826694-220835157	11.9872	3	2.52885e-05	0.0166641	-0.0381156
Midbrain	MARK1	chr1:clu_26918_NA	chr1:220826694-220835157	11.9872	3	2.52885e-05	0.0166641	0.04157
Midbrain	CELF2	chr10:clu_34045_NA	chr10:11356221-11363170	10.1623	5	0.00108601	0.0924171	0.110983
Midbrain	CELF2	chr10:clu_34045_NA	chr10:11356221-11363170	10.1623	5	0.00108601	0.0924171	-0.0336446
Midbrain	CELF2	chr10:clu_34045_NA	chr10:11356221-11363170	10.1623	5	0.00108601	0.0924171	-0.0273898
Midbrain	CELF2	chr10:clu_34045_NA	chr10:11356221-11363170	10.1623	5	0.00108601	0.0924171	-0.0476464
Midbrain	CREM	chr10:clu_34405_NA	chr10:35416121-35495823	29.5749	19	5.27022e-06	0.00861126	-0.0265609
Midbrain	CREM	chr10:clu_34405_NA	chr10:35416121-35495823	29.5749	19	5.27022e-06	0.00861126	0.050524
Midbrain	ANK3	chr10:clu_34708_NA	chr10:61958295-61962760	10.9382	2	1.77662e-05	0.0131643	0.0291837
Midbrain	ANK3	chr10:clu_34708_NA	chr10:61958295-61962760	10.9382	2	1.77662e-05	0.0131643	-0.0338663
Midbrain	REEP3	chr10:clu_34744_NA	chr10:65359043-65379415	9.561	4	0.00074373	0.0803286	0.0390799
Midbrain	HERC4	chr10:clu_34764_NA	chr10:69692537-69714352	12.7298	7	0.000628807	0.0742255	-0.0338544
Midbrain	HERC4	chr10:clu_34764_NA	chr10:69692537-69714352	12.7298	7	0.000628807	0.0742255	-0.036024
Midbrain	HERC4	chr10:clu_34764_NA	chr10:69692537-69714352	12.7298	7	0.000628807	0.0742255	0.0426495
Midbrain	AIFM2,TYSND1	chr10:clu_34847_NA	chr10:71883853-71912019	20.579	14	0.000167972	0.0398069	0.0502034
Midbrain	AIFM2,TYSND1	chr10:clu_34847_NA	chr10:71883853-71912019	20.579	14	0.000167972	0.0398069	0.0280805
Midbrain	AIFM2,TYSND1	chr10:clu_34847_NA	chr10:71883853-71912019	20.579	14	0.000167972	0.0398069	-0.0844574
Midbrain	NDST2,RP11-574K11.31	chr10:clu_35013_NA	chr10:75562534-75562767	5.43759	1	0.000974614	0.0882125	-0.0793043
Midbrain	NDST2,RP11-574K11.31	chr10:clu_35013_NA	chr10:75562534-75562767	5.43759	1	0.000974614	0.0882125	0.0793043
Midbrain	KCNMA1	chr10:clu_35062_NA	chr10:78669854-78674694	9.28298	2	9.29936e-05	0.0307126	-0.0511529
Midbrain	KCNMA1	chr10:clu_35062_NA	chr10:78669854-78674694	9.28298	2	9.29936e-05	0.0307126	0.156555
Midbrain	KCNMA1	chr10:clu_35062_NA	chr10:78669854-78674694	9.28298	2	9.29936e-05	0.0307126	-0.105402
Midbrain	LINC00856,RP11-90J7.3	chr10:clu_35089_NA	chr10:79939003-80230960	40.9569	39	7.00013e-05	0.0268295	0.0446185
Midbrain	LINC00856,RP11-90J7.3	chr10:clu_35089_NA	chr10:79939003-80230960	40.9569	39	7.00013e-05	0.0268295	0.0507272
Midbrain	LINC00856,RP11-90J7.3	chr10:clu_35089_NA	chr10:79939003-80230960	40.9569	39	7.00013e-05	0.0268295	-0.0304913
Midbrain	LINC00856,RP11-90J7.3	chr10:clu_35089_NA	chr10:79939003-80230960	40.9569	39	7.00013e-05	0.0268295	-0.0381087
Midbrain	SFXN3	chr10:clu_35571_NA	chr10:102796318-102796480	6.24398	1	0.000409585	0.0626382	0.0326084
Midbrain	SFXN3	chr10:clu_35571_NA	chr10:102796318-102796480	6.24398	1	0.000409585	0.0626382	-0.0326084
Midbrain	KCNIP2	chr10:clu_35599_NA	chr10:103588453-103588832	7.59783	2	0.000501537	0.066825	-0.0422678
Midbrain	KCNIP2	chr10:clu_35599_NA	chr10:103588453-103588832	7.59783	2	0.000501537	0.066825	0.0796585
Midbrain	KCNIP2	chr10:clu_35599_NA	chr10:103588453-103588832	7.59783	2	0.000501537	0.066825	-0.0373907
Midbrain	PPRC1	chr10:clu_35616_NA	chr10:103897795-103898636	6.59104	2	0.00137262	0.098641	0.0291553
Midbrain	PPRC1	chr10:clu_35616_NA	chr10:103897795-103898636	6.59104	2	0.00137262	0.098641	-0.025908
Midbrain	ADD3	chr10:clu_35773_NA	chr10:111890244-111893084	8.72585	3	0.000570559	0.0717126	0.0426818
Midbrain	ADD3	chr10:clu_35773_NA	chr10:111890244-111893084	8.72585	3	0.000570559	0.0717126	-0.0800767
Midbrain	ADD3	chr10:clu_35773_NA	chr10:111890244-111893084	8.72585	3	0.000570559	0.0717126	0.0388555
Midbrain	VTI1A,RP11-57H14.3	chr10:clu_35808_NA	chr10:114428757-114648494	9.94298	3	0.000179235	0.0406156	-0.0786546
Midbrain	VTI1A,RP11-57H14.3	chr10:clu_35808_NA	chr10:114428757-114648494	9.94298	3	0.000179235	0.0406156	0.0795243
Midbrain	ABLIM1	chr10:clu_35833_NA	chr10:116251637-116304764	7.17297	2	0.000767041	0.0803286	-0.135874
Midbrain	ABLIM1	chr10:clu_35833_NA	chr10:116251637-116304764	7.17297	2	0.000767041	0.0803286	0.137924
Midbrain	TUBGCP2	chr10:clu_36208_NA	chr10:135113586-135116333	13.8729	5	4.08088e-05	0.0191956	0.0295985
Midbrain	PHRF1	chr11:clu_52828_NA	chr11:581597-587259	12.0232	7	0.00111816	0.0928767	-0.0344403
Midbrain	PHRF1	chr11:clu_52828_NA	chr11:581597-587259	12.0232	7	0.00111816	0.0928767	0.0976846
Midbrain	PHRF1	chr11:clu_52828_NA	chr11:581597-587259	12.0232	7	0.00111816	0.0928767	0.0902094
Midbrain	PHRF1	chr11:clu_52828_NA	chr11:581597-587259	12.0232	7	0.00111816	0.0928767	-0.164518
Midbrain	ILK	chr11:clu_53065_NA	chr11:6625052-6625456	8.47213	3	0.000725644	0.0790443	0.0353621
Midbrain	ILK	chr11:clu_53065_NA	chr11:6625052-6625456	8.47213	3	0.000725644	0.0790443	-0.0395958
Midbrain	PPFIBP2	chr11:clu_53093_NA	chr11:7661101-7662710	13.6667	4	1.70208e-05	0.0131643	-0.037243
Midbrain	PPFIBP2	chr11:clu_53093_NA	chr11:7661101-7662710	13.6667	4	1.70208e-05	0.0131643	0.0732815
Midbrain	PPFIBP2	chr11:clu_53093_NA	chr11:7661101-7662710	13.6667	4	1.70208e-05	0.0131643	-0.0433633
Midbrain	DENND5A	chr11:clu_53153_NA	chr11:9228329-9286508	12.0821	6	0.000487138	0.0665135	-0.027436
Midbrain	DENND5A	chr11:clu_53153_NA	chr11:9228329-9286508	12.0821	6	0.000487138	0.0665135	0.0390965
Midbrain	DENND5A	chr11:clu_53153_NA	chr11:9228329-9286508	12.0821	6	0.000487138	0.0665135	-0.0331703
Midbrain	SWAP70	chr11:clu_53167_NA	chr11:9715833-9749600	8.30787	3	0.000847703	0.0843841	-0.0320784
Midbrain	BDNF-AS	chr11:clu_53425_NA	chr11:27528445-27661392	12.7486	8	0.00127976	0.0981002	-0.0257657
Midbrain	PHF21A	chr11:clu_53618_NA	chr11:46001517-46142486	14.7656	10	0.0010216	0.0893399	0.0628091
Midbrain	PHF21A	chr11:clu_53618_NA	chr11:46001517-46142486	14.7656	10	0.0010216	0.0893399	-0.0552492
Midbrain	NUP160	chr11:clu_53760_NA	chr11:47841010-47843639	6.12207	1	0.000466724	0.0655631	0.189202
Midbrain	NUP160	chr11:clu_53760_NA	chr11:47841010-47843639	6.12207	1	0.000466724	0.0655631	-0.189202
Midbrain	DPF2	chr11:clu_54284_NA	chr11:65111540-65113137	9.36908	2	8.53218e-05	0.0295557	-0.0558405
Midbrain	DPF2	chr11:clu_54284_NA	chr11:65111540-65113137	9.36908	2	8.53218e-05	0.0295557	0.113719
Midbrain	DPF2	chr11:clu_54284_NA	chr11:65111540-65113137	9.36908	2	8.53218e-05	0.0295557	-0.0578786
Midbrain	CLPB	chr11:clu_54747_NA	chr11:72005170-72005664	6.80742	1	0.000224405	0.0458332	0.0798886
Midbrain	CLPB	chr11:clu_54747_NA	chr11:72005170-72005664	6.80742	1	0.000224405	0.0458332	-0.0798886
Midbrain	ARAP1	chr11:clu_54769_NA	chr11:72423613-72437665	10.1005	5	0.00114571	0.0936494	0.0264383
Midbrain	ARAP1	chr11:clu_54769_NA	chr11:72423613-72437665	10.1005	5	0.00114571	0.0936494	-0.0315911
Midbrain	ARAP1	chr11:clu_54769_NA	chr11:72423613-72437665	10.1005	5	0.00114571	0.0936494	0.0274754
Midbrain	ARHGEF17	chr11:clu_54792_NA	chr11:73022875-73063875	18.2876	8	1.37752e-05	0.0127428	0.0862492
Midbrain	ARHGEF17	chr11:clu_54792_NA	chr11:73022875-73063875	18.2876	8	1.37752e-05	0.0127428	-0.120778
Midbrain	CREBZF	chr11:clu_55037_NA	chr11:85373501-85374568	6.6056	2	0.00135277	0.0983529	0.0325653
Midbrain	CREBZF	chr11:clu_55037_NA	chr11:85373501-85374568	6.6056	2	0.00135277	0.0983529	-0.0656287
Midbrain	CREBZF	chr11:clu_55037_NA	chr11:85373501-85374568	6.6056	2	0.00135277	0.0983529	0.0330634
Midbrain	CCDC82	chr11:clu_55176_NA	chr11:96086878-96120694	12.1164	6	0.000473183	0.0658742	-0.0270735
Midbrain	CCDC82	chr11:clu_55176_NA	chr11:96086878-96120694	12.1164	6	0.000473183	0.0658742	-0.0456756
Midbrain	DIXDC1	chr11:clu_55348_NA	chr11:111866870-111887415	5.82482	1	0.000642151	0.0743864	0.0271032
Midbrain	DIXDC1	chr11:clu_55348_NA	chr11:111866870-111887415	5.82482	1	0.000642151	0.0743864	-0.0271032
Midbrain	PHLDB1	chr11:clu_55544_NA	chr11:118526400-118527393	11.9132	3	2.71539e-05	0.0168598	-0.0506343
Midbrain	PHLDB1	chr11:clu_55544_NA	chr11:118526400-118527393	11.9132	3	2.71539e-05	0.0168598	0.0992455
Midbrain	PHLDB1	chr11:clu_55544_NA	chr11:118526400-118527393	11.9132	3	2.71539e-05	0.0168598	-0.0465595
Midbrain	C1RL	chr12:clu_31166_NA	chr12:7249759-7254494	12.8796	5	9.93639e-05	0.0317912	-0.0805965
Midbrain	C1RL	chr12:clu_31166_NA	chr12:7249759-7254494	12.8796	5	9.93639e-05	0.0317912	-0.0278908
Midbrain	C1RL	chr12:clu_31166_NA	chr12:7249759-7254494	12.8796	5	9.93639e-05	0.0317912	0.0474092
Midbrain	C1RL	chr12:clu_31166_NA	chr12:7249759-7254494	12.8796	5	9.93639e-05	0.0317912	-0.0295702
Midbrain	C1RL	chr12:clu_31166_NA	chr12:7249759-7254494	12.8796	5	9.93639e-05	0.0317912	0.0733695
Midbrain	PPFIBP1	chr12:clu_31508_NA	chr12:27731172-27798995	7.9391	2	0.000356527	0.0583636	0.0581076
Midbrain	PPFIBP1	chr12:clu_31508_NA	chr12:27731172-27798995	7.9391	2	0.000356527	0.0583636	0.0462172
Midbrain	PPFIBP1	chr12:clu_31508_NA	chr12:27731172-27798995	7.9391	2	0.000356527	0.0583636	-0.104325
Midbrain	BICD1	chr12:clu_31587_NA	chr12:32490640-32530474	14.1314	6	8.38356e-05	0.0295557	-0.057352
Midbrain	BICD1	chr12:clu_31587_NA	chr12:32490640-32530474	14.1314	6	8.38356e-05	0.0295557	0.0413054
Midbrain	CNTN1	chr12:clu_31630_NA	chr12:41353036-41374711	9.02476	3	0.000429625	0.064238	0.129968
Midbrain	CNTN1	chr12:clu_31630_NA	chr12:41353036-41374711	9.02476	3	0.000429625	0.064238	-0.12535
Midbrain	TMEM117	chr12:clu_31658_NA	chr12:44693522-44787942	10.917	2	1.81462e-05	0.0131643	0.108443
Midbrain	TMEM117	chr12:clu_31658_NA	chr12:44693522-44787942	10.917	2	1.81462e-05	0.0131643	-0.109376
Midbrain	ANO6	chr12:clu_31672_NA	chr12:45815056-45833458	8.16884	3	0.000966808	0.0882125	0.0902076
Midbrain	ANO6	chr12:clu_31672_NA	chr12:45815056-45833458	8.16884	3	0.000966808	0.0882125	-0.0594758
Midbrain	ANO6	chr12:clu_31672_NA	chr12:45815056-45833458	8.16884	3	0.000966808	0.0882125	-0.0446172
Midbrain	RAPGEF3	chr12:clu_31706_NA	chr12:48141632-48142237	8.84932	3	0.000507495	0.067299	-0.039295
Midbrain	RAPGEF3	chr12:clu_31706_NA	chr12:48141632-48142237	8.84932	3	0.000507495	0.067299	0.0517525
Midbrain	HDAC7	chr12:clu_31720_NA	chr12:48179668-48181495	7.24637	2	0.000712757	0.0787457	-0.0980241
Midbrain	HDAC7	chr12:clu_31720_NA	chr12:48179668-48181495	7.24637	2	0.000712757	0.0787457	0.0980447
Midbrain	ZNF641	chr12:clu_31753_NA	chr12:48738495-48741035	9.18352	4	0.00104604	0.0902063	-0.152774
Midbrain	ZNF641	chr12:clu_31753_NA	chr12:48738495-48741035	9.18352	4	0.00104604	0.0902063	0.0766033
Midbrain	ZNF641	chr12:clu_31753_NA	chr12:48738495-48741035	9.18352	4	0.00104604	0.0902063	0.070176
Midbrain	SUOX	chr12:clu_32152_NA	chr12:56386018-56395996	15.5667	8	0.000133029	0.0359119	-0.054324
Midbrain	SUOX	chr12:clu_32152_NA	chr12:56386018-56395996	15.5667	8	0.000133029	0.0359119	-0.0668695
Midbrain	SUOX	chr12:clu_32152_NA	chr12:56386018-56395996	15.5667	8	0.000133029	0.0359119	0.0616057
Midbrain	SUOX	chr12:clu_32152_NA	chr12:56386018-56395996	15.5667	8	0.000133029	0.0359119	0.0298518
Midbrain	R3HDM2	chr12:clu_32316_NA	chr12:57690334-57691873	12.7208	2	2.98819e-06	0.00612289	-0.0623422
Midbrain	R3HDM2	chr12:clu_32316_NA	chr12:57690334-57691873	12.7208	2	2.98819e-06	0.00612289	0.0557981
Midbrain	TSPAN19	chr12:clu_32693_NA	chr12:85408334-85411235	9.03912	4	0.00119139	0.0953265	0.0586057
Midbrain	TSPAN19	chr12:clu_32693_NA	chr12:85408334-85411235	9.03912	4	0.00119139	0.0953265	-0.0376946
Midbrain	TSPAN19	chr12:clu_32693_NA	chr12:85408334-85411235	9.03912	4	0.00119139	0.0953265	-0.0570395
Midbrain	VEZT	chr12:clu_32781_NA	chr12:95660408-95688048	15.9518	7	4.23212e-05	0.0196099	-0.0270087
Midbrain	VEZT	chr12:clu_32781_NA	chr12:95660408-95688048	15.9518	7	4.23212e-05	0.0196099	0.0601941
Midbrain	CDK17	chr12:clu_32804_NA	chr12:96688900-96691405	9.36207	2	8.59224e-05	0.0295557	0.0269098
Midbrain	CDK17	chr12:clu_32804_NA	chr12:96688900-96691405	9.36207	2	8.59224e-05	0.0295557	-0.0283559
Midbrain	ANKS1B	chr12:clu_32839_NA	chr12:100206089-100377882	16.2144	2	9.08146e-08	0.000786853	0.116664
Midbrain	ANKS1B	chr12:clu_32839_NA	chr12:100206089-100377882	16.2144	2	9.08146e-08	0.000786853	-0.116664
Midbrain	SELPLG,CORO1C	chr12:clu_33032_NA	chr12:109018088-109042381	7.60312	2	0.000498893	0.0667592	-0.152512
Midbrain	SELPLG,CORO1C	chr12:clu_33032_NA	chr12:109018088-109042381	7.60312	2	0.000498893	0.0667592	0.157296
Midbrain	DAO	chr12:clu_33039_NA	chr12:109284049-109293153	9.27476	4	0.000963377	0.0882125	-0.0391633
Midbrain	UBE3B	chr12:clu_33072_NA	chr12:109940995-109947401	8.75312	3	0.000555996	0.0715848	-0.0605421
Midbrain	UBE3B	chr12:clu_33072_NA	chr12:109940995-109947401	8.75312	3	0.000555996	0.0715848	0.0588579
Midbrain	VSIG10	chr12:clu_33349_NA	chr12:118533619-118564286	24.6013	9	1.52073e-07	0.000786853	0.0704978
Midbrain	VSIG10	chr12:clu_33349_NA	chr12:118533619-118564286	24.6013	9	1.52073e-07	0.000786853	0.0652732
Midbrain	VSIG10	chr12:clu_33349_NA	chr12:118533619-118564286	24.6013	9	1.52073e-07	0.000786853	-0.0344182
Midbrain	VSIG10	chr12:clu_33349_NA	chr12:118533619-118564286	24.6013	9	1.52073e-07	0.000786853	-0.197448
Midbrain	VSIG10	chr12:clu_33349_NA	chr12:118533619-118564286	24.6013	9	1.52073e-07	0.000786853	0.0965671
Midbrain	DDX55	chr12:clu_33635_NA	chr12:124086803-124092147	14.5334	10	0.00121536	0.0964985	0.0256164
Midbrain	DDX55	chr12:clu_33635_NA	chr12:124086803-124092147	14.5334	10	0.00121536	0.0964985	-0.0549332
Midbrain	DDX55	chr12:clu_33635_NA	chr12:124086803-124092147	14.5334	10	0.00121536	0.0964985	0.039164
Midbrain	DDX55	chr12:clu_33635_NA	chr12:124086803-124092147	14.5334	10	0.00121536	0.0964985	-0.0392723
Midbrain	CRYL1	chr13:clu_13699_NA	chr13:21006435-21086582	11.9925	7	0.0011463	0.0936494	-0.0300854
Midbrain	DCLK1	chr13:clu_13926_NA	chr13:36348836-36367503	8.06108	2	0.000315585	0.0572943	-0.0394819
Midbrain	DCLK1	chr13:clu_13926_NA	chr13:36348836-36367503	8.06108	2	0.000315585	0.0572943	0.0755607
Midbrain	DCLK1	chr13:clu_13926_NA	chr13:36348836-36367503	8.06108	2	0.000315585	0.0572943	-0.0360788
Midbrain	CLN5,MYCBP2-AS1	chr13:clu_14318_NA	chr13:77570262-77649653	9.33135	4	0.00091538	0.0861579	-0.0341534
Midbrain	CLN5,MYCBP2-AS1	chr13:clu_14318_NA	chr13:77570262-77649653	9.33135	4	0.00091538	0.0861579	0.0615622
Midbrain	CLN5,MYCBP2-AS1	chr13:clu_14318_NA	chr13:77570262-77649653	9.33135	4	0.00091538	0.0861579	-0.0292402
Midbrain	VASH1	chr14:clu_1184_NA	chr14:77229473-77239480	10.3242	5	0.000943786	0.0874622	-0.032346
Midbrain	VASH1	chr14:clu_1184_NA	chr14:77229473-77239480	10.3242	5	0.000943786	0.0874622	0.0421579
Midbrain	PRMT5,HAUS4,RP11-298I3.5	chr14:clu_120_NA	chr14:23396823-23416380	14.4178	7	0.000155027	0.0394156	-0.0333071
Midbrain	PRMT5,HAUS4,RP11-298I3.5	chr14:clu_120_NA	chr14:23396823-23416380	14.4178	7	0.000155027	0.0394156	0.0428225
Midbrain	TTC7B	chr14:clu_1328_NA	chr14:91161922-91211136	11.1355	5	0.000464981	0.0655631	-0.0280424
Midbrain	TTC7B	chr14:clu_1328_NA	chr14:91161922-91211136	11.1355	5	0.000464981	0.0655631	0.0522413
Midbrain	TTC7B	chr14:clu_1328_NA	chr14:91161922-91211136	11.1355	5	0.000464981	0.0655631	-0.032592
Midbrain	WARS	chr14:clu_1546_NA	chr14:100828258-100842597	19.1563	15	0.000811083	0.0830294	0.0854947
Midbrain	WARS	chr14:clu_1546_NA	chr14:100828258-100842597	19.1563	15	0.000811083	0.0830294	-0.0571416
Midbrain	DHRS4,DHRS4L2	chr14:clu_186_NA	chr14:24424421-24473546	18.6223	15	0.00116541	0.094465	-0.0354922
Midbrain	DHRS4,DHRS4L2	chr14:clu_186_NA	chr14:24424421-24473546	18.6223	15	0.00116541	0.094465	0.0299143
Midbrain	RNASE1	chr14:clu_38_NA	chr14:21270252-21270956	13.8796	4	1.39557e-05	0.0127428	0.0529806
Midbrain	RNASE1	chr14:clu_38_NA	chr14:21270252-21270956	13.8796	4	1.39557e-05	0.0127428	-0.0575785
Midbrain	ABHD12B	chr14:clu_605_NA	chr14:51338996-51347170	10.8024	4	0.000240191	0.0484204	0.0355698
Midbrain	ABHD12B	chr14:clu_605_NA	chr14:51338996-51347170	10.8024	4	0.000240191	0.0484204	0.146786
Midbrain	ABHD12B	chr14:clu_605_NA	chr14:51338996-51347170	10.8024	4	0.000240191	0.0484204	-0.0665811
Midbrain	ABHD12B	chr14:clu_605_NA	chr14:51338996-51347170	10.8024	4	0.000240191	0.0484204	0.114732
Midbrain	ABHD12B	chr14:clu_605_NA	chr14:51338996-51347170	10.8024	4	0.000240191	0.0484204	-0.230507
Midbrain	ACTN1	chr14:clu_923_NA	chr14:69343957-69346679	9.53998	4	0.000758018	0.0803286	-0.0804443
Midbrain	ACTN1	chr14:clu_923_NA	chr14:69343957-69346679	9.53998	4	0.000758018	0.0803286	0.027586
Midbrain	ACTN1	chr14:clu_923_NA	chr14:69343957-69346679	9.53998	4	0.000758018	0.0803286	-0.0424803
Midbrain	ACTN1	chr14:clu_923_NA	chr14:69343957-69346679	9.53998	4	0.000758018	0.0803286	0.0312517
Midbrain	ACTN1	chr14:clu_923_NA	chr14:69343957-69346679	9.53998	4	0.000758018	0.0803286	0.064087
Midbrain	ACTN1	chr14:clu_927_NA	chr14:69392389-69445669	5.86488	1	0.000615085	0.0736109	-0.0548431
Midbrain	ACTN1	chr14:clu_927_NA	chr14:69392389-69445669	5.86488	1	0.000615085	0.0736109	0.0548431
Midbrain	C15orf57	chr15:clu_12054_NA	chr15:40849571-40857175	10.5262	5	0.000791792	0.0819568	-0.0309496
Midbrain	NDUFAF1	chr15:clu_12095_NA	chr15:41689338-41694689	9.2388	4	0.000995152	0.0890998	-0.0505663
Midbrain	NDUFAF1	chr15:clu_12095_NA	chr15:41689338-41694689	9.2388	4	0.000995152	0.0890998	0.0908597
Midbrain	MAPKBP1	chr15:clu_12118_NA	chr15:42067587-42103081	8.7576	2	0.000157261	0.0394156	-0.039344
Midbrain	MAPKBP1	chr15:clu_12118_NA	chr15:42067587-42103081	8.7576	2	0.000157261	0.0394156	0.0272969
Midbrain	SHF	chr15:clu_12331_NA	chr15:45460331-45467417	17.6933	10	0.000107244	0.0320133	0.045921
Midbrain	MYEF2	chr15:clu_12366_NA	chr15:48446090-48450190	10.6971	1	3.73905e-06	0.00682816	-0.0753515
Midbrain	MYEF2	chr15:clu_12366_NA	chr15:48446090-48450190	10.6971	1	3.73905e-06	0.00682816	0.0753515
Midbrain	DIS3L	chr15:clu_12837_NA	chr15:66587479-66601047	12.022	5	0.000212933	0.0437782	-0.0866257
Midbrain	DIS3L	chr15:clu_12837_NA	chr15:66587479-66601047	12.022	5	0.000212933	0.0437782	0.100053
Midbrain	LRRC49	chr15:clu_12922_NA	chr15:71185979-71196891	14.5323	6	5.91479e-05	0.0241612	-0.0505879
Midbrain	LRRC49	chr15:clu_12922_NA	chr15:71185979-71196891	14.5323	6	5.91479e-05	0.0241612	0.0506527
Midbrain	CLK3	chr15:clu_13033_NA	chr15:74911689-74912350	8.8536	1	2.57651e-05	0.0166641	0.0469045
Midbrain	CLK3	chr15:clu_13033_NA	chr15:74911689-74912350	8.8536	1	2.57651e-05	0.0166641	-0.0469045
Midbrain	PTPN9	chr15:clu_13095_NA	chr15:75772255-75798016	13.0428	3	9.1518e-06	0.0105229	0.050879
Midbrain	PTPN9	chr15:clu_13095_NA	chr15:75772255-75798016	13.0428	3	9.1518e-06	0.0105229	-0.0453715
Midbrain	IQGAP1	chr15:clu_13474_NA	chr15:90972898-90976951	9.49911	2	7.49184e-05	0.0276886	-0.0664289
Midbrain	IQGAP1	chr15:clu_13474_NA	chr15:90972898-90976951	9.49911	2	7.49184e-05	0.0276886	0.169291
Midbrain	IQGAP1	chr15:clu_13474_NA	chr15:90972898-90976951	9.49911	2	7.49184e-05	0.0276886	-0.102862
Midbrain	SLCO3A1	chr15:clu_13547_NA	chr15:92694244-92715010	11.3016	5	0.00040192	0.0620776	-0.0336533
Midbrain	RPUSD1	chr16:clu_36372_NA	chr16:836928-837397	10.8326	5	0.000606139	0.0736109	0.107192
Midbrain	RPUSD1	chr16:clu_36372_NA	chr16:836928-837397	10.8326	5	0.000606139	0.0736109	-0.154523
Midbrain	CRAMP1,LA16c-431H6.6	chr16:clu_36439_NA	chr16:1715139-1716423	7.92957	2	0.000359942	0.0583636	-0.0416802
Midbrain	CRAMP1,LA16c-431H6.6	chr16:clu_36439_NA	chr16:1715139-1716423	7.92957	2	0.000359942	0.0583636	0.141454
Midbrain	CRAMP1,LA16c-431H6.6	chr16:clu_36439_NA	chr16:1715139-1716423	7.92957	2	0.000359942	0.0583636	-0.0997737
Midbrain	SPSB3	chr16:clu_36464_NA	chr16:1827873-1828135	6.76108	2	0.00115798	0.0941086	0.0322458
Midbrain	SPSB3	chr16:clu_36464_NA	chr16:1827873-1828135	6.76108	2	0.00115798	0.0941086	-0.0345248
Midbrain	E4F1	chr16:clu_36561_NA	chr16:2283648-2283886	6.85283	2	0.00105646	0.0906017	-0.150979
Midbrain	E4F1	chr16:clu_36561_NA	chr16:2283648-2283886	6.85283	2	0.00105646	0.0906017	0.150765
Midbrain	PARN	chr16:clu_36912_NA	chr16:14698083-14722029	10.2315	3	0.000136082	0.0361695	-0.102935
Midbrain	PARN	chr16:clu_36912_NA	chr16:14698083-14722029	10.2315	3	0.000136082	0.0361695	0.0462365
Midbrain	PARN	chr16:clu_36912_NA	chr16:14698083-14722029	10.2315	3	0.000136082	0.0361695	0.0565306
Midbrain	C16orf62	chr16:clu_37060_NA	chr16:19659204-19663298	6.6706	2	0.00126764	0.0978949	0.0364438
Midbrain	TNRC6A	chr16:clu_37187_NA	chr16:24652330-24800553	17.0083	13	0.00119656	0.0954942	0.0359256
Midbrain	TNRC6A	chr16:clu_37187_NA	chr16:24652330-24800553	17.0083	13	0.00119656	0.0954942	0.0371605
Midbrain	XPO6	chr16:clu_37260_NA	chr16:28164106-28167395	16.7122	6	8.68687e-06	0.0105229	-0.0693816
Midbrain	XPO6	chr16:clu_37260_NA	chr16:28164106-28167395	16.7122	6	8.68687e-06	0.0105229	0.147199
Midbrain	XPO6	chr16:clu_37260_NA	chr16:28164106-28167395	16.7122	6	8.68687e-06	0.0105229	-0.0262291
Midbrain	XPO6	chr16:clu_37260_NA	chr16:28164106-28167395	16.7122	6	8.68687e-06	0.0105229	-0.0542991
Midbrain	STX4	chr16:clu_37502_NA	chr16:31049968-31050862	7.83529	3	0.00132466	0.0981002	-0.027215
Midbrain	STX4	chr16:clu_37502_NA	chr16:31049968-31050862	7.83529	3	0.00132466	0.0981002	-0.0295816
Midbrain	STX4	chr16:clu_37502_NA	chr16:31049968-31050862	7.83529	3	0.00132466	0.0981002	0.0556494
Midbrain	LONP2	chr16:clu_37598_NA	chr16:48304185-48311249	8.82403	3	0.000519821	0.0680921	0.0266346
Midbrain	GINS3,LINC02137	chr16:clu_37852_NA	chr16:58329438-58495375	24.6634	17	5.36991e-05	0.0225282	0.0282993
Midbrain	GINS3,LINC02137	chr16:clu_37852_NA	chr16:58329438-58495375	24.6634	17	5.36991e-05	0.0225282	0.0383757
Midbrain	GINS3,LINC02137	chr16:clu_37852_NA	chr16:58329438-58495375	24.6634	17	5.36991e-05	0.0225282	-0.0295405
Midbrain	GINS3,LINC02137	chr16:clu_37852_NA	chr16:58329438-58495375	24.6634	17	5.36991e-05	0.0225282	0.0340696
Midbrain	GINS3,LINC02137	chr16:clu_37852_NA	chr16:58329438-58495375	24.6634	17	5.36991e-05	0.0225282	-0.058419
Midbrain	ZFP90	chr16:clu_38111_NA	chr16:68592027-68592376	5.14518	1	0.00133728	0.0981002	0.134712
Midbrain	ZFP90	chr16:clu_38111_NA	chr16:68592027-68592376	5.14518	1	0.00133728	0.0981002	-0.134712
Midbrain	KIF1C	chr17:clu_2056_NA	chr17:4918132-4923291	10.2258	2	3.62222e-05	0.0186422	0.0372793
Midbrain	CHD3	chr17:clu_2334_NA	chr17:7804311-7805928	7.71597	2	0.000445652	0.0648541	-0.0455431
Midbrain	CHD3	chr17:clu_2334_NA	chr17:7804311-7805928	7.71597	2	0.000445652	0.0648541	0.0429132
Midbrain	LINC00675,PIRT	chr17:clu_2434_NA	chr17:10699265-10741262	8.70721	3	0.000580735	0.0721156	0.035515
Midbrain	LINC00675,PIRT	chr17:clu_2434_NA	chr17:10699265-10741262	8.70721	3	0.000580735	0.0721156	-0.077394
Midbrain	MAP2K4	chr17:clu_2448_NA	chr17:11924318-11998892	12.0535	7	0.00109101	0.0924171	0.0364218
Midbrain	GID4	chr17:clu_2585_NA	chr17:17962283-17968494	14.5775	2	4.6675e-07	0.0013173	0.0459106
Midbrain	GID4	chr17:clu_2585_NA	chr17:17962283-17968494	14.5775	2	4.6675e-07	0.0013173	-0.0459106
Midbrain	SSH2	chr17:clu_2896_NA	chr17:28011702-28029977	7.29397	2	0.000679623	0.0771953	-0.0285329
Midbrain	NF1	chr17:clu_2961_NA	chr17:29687721-29701031	8.91045	4	0.00133762	0.0981002	0.0956201
Midbrain	NF1	chr17:clu_2961_NA	chr17:29687721-29701031	8.91045	4	0.00133762	0.0981002	-0.0361309
Midbrain	2021-09-04	chr17:clu_4040_NA	chr17:56604339-56609322	12.6259	5	0.000124566	0.0348393	0.0366044
Midbrain	2021-09-04	chr17:clu_4040_NA	chr17:56604339-56609322	12.6259	5	0.000124566	0.0348393	-0.0473429
Midbrain	RPS6KB1	chr17:clu_4081_NA	chr17:58007535-58011531	10.4613	5	0.000837808	0.084174	0.123211
Midbrain	RPS6KB1	chr17:clu_4081_NA	chr17:58007535-58011531	10.4613	5	0.000837808	0.084174	-0.0990601
Midbrain	PYCR1	chr17:clu_5053_NA	chr17:79893020-79893213	5.25981	1	0.00118113	0.0952421	0.0310313
Midbrain	PYCR1	chr17:clu_5053_NA	chr17:79893020-79893213	5.25981	1	0.00118113	0.0952421	-0.0310313
Midbrain	CSNK1D	chr17:clu_5113_NA	chr17:80197938-80206751	12.1177	7	0.00103571	0.0898147	0.031351
Midbrain	CSNK1D	chr17:clu_5113_NA	chr17:80197938-80206751	12.1177	7	0.00103571	0.0898147	-0.0254561
Midbrain	PRELID3A	chr18:clu_14850_NA	chr18:12421628-12427220	9.22702	4	0.00100579	0.0890998	0.0401386
Midbrain	ROCK1	chr18:clu_14909_NA	chr18:18540167-18546878	8.69552	2	0.000167334	0.0398069	-0.0278022
Midbrain	ROCK1	chr18:clu_14909_NA	chr18:18540167-18546878	8.69552	2	0.000167334	0.0398069	0.0555333
Midbrain	ROCK1	chr18:clu_14909_NA	chr18:18540167-18546878	8.69552	2	0.000167334	0.0398069	-0.0277311
Midbrain	POLI	chr18:clu_15253_NA	chr18:51796031-51800296	14.393	6	6.67819e-05	0.0262436	-0.10852
Midbrain	POLI	chr18:clu_15253_NA	chr18:51796031-51800296	14.393	6	6.67819e-05	0.0262436	0.160119
Midbrain	POLI	chr18:clu_15253_NA	chr18:51796031-51800296	14.393	6	6.67819e-05	0.0262436	-0.0460117
Midbrain	POLRMT	chr19:clu_27496_NA	chr19:632938-633425	5.20579	1	0.00125227	0.0978949	0.122612
Midbrain	POLRMT	chr19:clu_27496_NA	chr19:632938-633425	5.20579	1	0.00125227	0.0978949	-0.122612
Midbrain	CELF5	chr19:clu_27745_NA	chr19:3224996-3250983	9.30979	2	9.05333e-05	0.0302216	-0.063191
Midbrain	CELF5	chr19:clu_27745_NA	chr19:3224996-3250983	9.30979	2	9.05333e-05	0.0302216	0.0631914
Midbrain	RANBP3	chr19:clu_27954_NA	chr19:5928098-5932463	9.04758	3	0.000420412	0.0633676	-0.0261479
Midbrain	RANBP3	chr19:clu_27954_NA	chr19:5928098-5932463	9.04758	3	0.000420412	0.0633676	0.043625
Midbrain	ADGRE5	chr19:clu_28599_NA	chr19:14517772-14518904	8.865	4	0.0013934	0.0991113	-0.0342615
Midbrain	ADGRE5	chr19:clu_28599_NA	chr19:14517772-14518904	8.865	4	0.0013934	0.0991113	-0.0258957
Midbrain	ADGRE5	chr19:clu_28599_NA	chr19:14517772-14518904	8.865	4	0.0013934	0.0991113	0.0561703
Midbrain	MYO9B	chr19:clu_28753_NA	chr19:17286550-17295674	10.3691	3	0.00011931	0.0342962	-0.0547073
Midbrain	MYO9B	chr19:clu_28753_NA	chr19:17286550-17295674	10.3691	3	0.00011931	0.0342962	0.029216
Midbrain	LINC00663,CTC-559E9.4	chr19:clu_29019_NA	chr19:19869355-19873347	9.20054	4	0.0010301	0.0898147	-0.0534278
Midbrain	LINC00663,CTC-559E9.4	chr19:clu_29019_NA	chr19:19869355-19873347	9.20054	4	0.0010301	0.0898147	0.0727028
Midbrain	SYNE4	chr19:clu_29349_NA	chr19:36496339-36499456	18.0137	13	0.00058757	0.0723704	-0.0521639
Midbrain	SYNE4	chr19:clu_29349_NA	chr19:36496339-36499456	18.0137	13	0.00058757	0.0723704	0.0507551
Midbrain	SYNE4	chr19:clu_29349_NA	chr19:36496339-36499456	18.0137	13	0.00058757	0.0723704	-0.0364511
Midbrain	ZNF573	chr19:clu_29451_NA	chr19:38231081-38270184	26.2209	21	0.00016525	0.0398069	0.0434606
Midbrain	ZNF573	chr19:clu_29451_NA	chr19:38231081-38270184	26.2209	21	0.00016525	0.0398069	0.0285394
Midbrain	ZNF573	chr19:clu_29451_NA	chr19:38231081-38270184	26.2209	21	0.00016525	0.0398069	-0.0769935
Midbrain	LIPE-AS1	chr19:clu_29794_NA	chr19:42901376-43155239	19.4241	13	0.00021141	0.0437782	-0.0368632
Midbrain	LIPE-AS1	chr19:clu_29794_NA	chr19:42901376-43155239	19.4241	13	0.00021141	0.0437782	-0.0634699
Midbrain	LIPE-AS1	chr19:clu_29794_NA	chr19:42901376-43155239	19.4241	13	0.00021141	0.0437782	0.0315575
Midbrain	LIPE-AS1	chr19:clu_29794_NA	chr19:42901376-43155239	19.4241	13	0.00021141	0.0437782	-0.0471585
Midbrain	LIPE-AS1	chr19:clu_29794_NA	chr19:42901376-43155239	19.4241	13	0.00021141	0.0437782	0.0302755
Midbrain	LIPE-AS1	chr19:clu_29794_NA	chr19:42901376-43155239	19.4241	13	0.00021141	0.0437782	0.0514354
Midbrain	ZNF235	chr19:clu_29870_NA	chr19:44733116-44802973	15.6799	10	0.00051158	0.067299	0.21473
Midbrain	ZNF235	chr19:clu_29870_NA	chr19:44733116-44802973	15.6799	10	0.00051158	0.067299	-0.0595912
Midbrain	ZNF235	chr19:clu_29870_NA	chr19:44733116-44802973	15.6799	10	0.00051158	0.067299	-0.0503852
Midbrain	ZNF235	chr19:clu_29870_NA	chr19:44733116-44802973	15.6799	10	0.00051158	0.067299	0.0885563
Midbrain	ZNF235	chr19:clu_29870_NA	chr19:44733116-44802973	15.6799	10	0.00051158	0.067299	-0.0299695
Midbrain	ZNF235	chr19:clu_29870_NA	chr19:44733116-44802973	15.6799	10	0.00051158	0.067299	0.050517
Midbrain	ZNF235	chr19:clu_29870_NA	chr19:44733116-44802973	15.6799	10	0.00051158	0.067299	-0.0793414
Midbrain	ZNF235	chr19:clu_29870_NA	chr19:44733116-44802973	15.6799	10	0.00051158	0.067299	-0.0270696
Midbrain	ZNF235	chr19:clu_29870_NA	chr19:44733116-44802973	15.6799	10	0.00051158	0.067299	-0.109444
Midbrain	PPP1R37	chr19:clu_29921_NA	chr19:45596785-45643494	7.61113	2	0.000494915	0.0665135	0.0355649
Midbrain	ZNF586,CTD-2583A14.10,ZNF587,ZNF587B	chr19:clu_30797_NA	chr19:58268366-58369944	40.6785	26	1.29317e-07	0.000786853	0.0331376
Midbrain	ZNF586,CTD-2583A14.10,ZNF587,ZNF587B	chr19:clu_30797_NA	chr19:58268366-58369944	40.6785	26	1.29317e-07	0.000786853	0.105114
Midbrain	ZNF586,CTD-2583A14.10,ZNF587,ZNF587B	chr19:clu_30797_NA	chr19:58268366-58369944	40.6785	26	1.29317e-07	0.000786853	-0.0689083
Midbrain	ZNF586,CTD-2583A14.10,ZNF587,ZNF587B	chr19:clu_30797_NA	chr19:58268366-58369944	40.6785	26	1.29317e-07	0.000786853	-0.0807449
Midbrain	ZNF586,CTD-2583A14.10,ZNF587,ZNF587B	chr19:clu_30797_NA	chr19:58268366-58369944	40.6785	26	1.29317e-07	0.000786853	0.035558
Midbrain	ZNF586,CTD-2583A14.10,ZNF587,ZNF587B	chr19:clu_30797_NA	chr19:58268366-58369944	40.6785	26	1.29317e-07	0.000786853	-0.0646273
Midbrain	ZNF586,CTD-2583A14.10,ZNF587,ZNF587B	chr19:clu_30797_NA	chr19:58268366-58369944	40.6785	26	1.29317e-07	0.000786853	-0.0312614
Midbrain	ZNF586,CTD-2583A14.10,ZNF587,ZNF587B	chr19:clu_30797_NA	chr19:58268366-58369944	40.6785	26	1.29317e-07	0.000786853	0.0523802
Midbrain	ZNF274	chr19:clu_30825_NA	chr19:58718568-58722926	6.56351	2	0.00141092	0.0991113	-0.0966483
Midbrain	ZNF274	chr19:clu_30825_NA	chr19:58718568-58722926	6.56351	2	0.00141092	0.0991113	0.0781502
Midbrain	SH3YL1	chr2:clu_41178_NA	chr2:219001-229966	15.625	6	2.27092e-05	0.0153263	0.0833461
Midbrain	SH3YL1	chr2:clu_41178_NA	chr2:219001-229966	15.625	6	2.27092e-05	0.0153263	-0.183195
Midbrain	SH3YL1	chr2:clu_41178_NA	chr2:219001-229966	15.625	6	2.27092e-05	0.0153263	0.0915617
Midbrain	SH3YL1	chr2:clu_41181_NA	chr2:234272-247538	10.771	5	0.000639648	0.0743864	-0.129616
Midbrain	SH3YL1	chr2:clu_41181_NA	chr2:234272-247538	10.771	5	0.000639648	0.0743864	0.264154
Midbrain	SH3YL1	chr2:clu_41181_NA	chr2:234272-247538	10.771	5	0.000639648	0.0743864	-0.0700406
Midbrain	SH3YL1	chr2:clu_41181_NA	chr2:234272-247538	10.771	5	0.000639648	0.0743864	-0.0676344
Midbrain	PREB	chr2:clu_41614_NA	chr2:27354950-27355471	8.92754	4	0.00131723	0.0981002	-0.0312719
Midbrain	SLC30A6	chr2:clu_41776_NA	chr2:32396442-32491835	22.945	21	0.00132151	0.0981002	0.0486191
Midbrain	NDUFAF7	chr2:clu_41874_NA	chr2:37468780-37471006	9.75248	4	0.000625262	0.07418	-0.0611002
Midbrain	NDUFAF7	chr2:clu_41874_NA	chr2:37468780-37471006	9.75248	4	0.000625262	0.07418	0.0312779
Midbrain	NDUFAF7	chr2:clu_41874_NA	chr2:37468780-37471006	9.75248	4	0.000625262	0.07418	0.0258519
Midbrain	THADA	chr2:clu_41986_NA	chr2:43802166-43805652	6.98942	2	0.000921584	0.0864367	0.100142
Midbrain	THADA	chr2:clu_41986_NA	chr2:43802166-43805652	6.98942	2	0.000921584	0.0864367	-0.0577612
Midbrain	THADA	chr2:clu_41986_NA	chr2:43802166-43805652	6.98942	2	0.000921584	0.0864367	-0.0423807
Midbrain	EXOC6B	chr2:clu_42470_NA	chr2:72692468-72719447	7.23718	2	0.00071934	0.0789925	-0.039341
Midbrain	EXOC6B	chr2:clu_42470_NA	chr2:72692468-72719447	7.23718	2	0.00071934	0.0789925	0.0456394
Midbrain	RTKN	chr2:clu_42554_NA	chr2:74653701-74654296	7.11473	2	0.000813044	0.0830294	-0.0287075
Midbrain	RTKN	chr2:clu_42554_NA	chr2:74653701-74654296	7.11473	2	0.000813044	0.0830294	0.043336
Midbrain	ELMOD3	chr2:clu_42653_NA	chr2:85604597-85616874	9.0804	3	0.000407505	0.0626287	0.0549204
Midbrain	ELMOD3	chr2:clu_42653_NA	chr2:85604597-85616874	9.0804	3	0.000407505	0.0626287	-0.133323
Midbrain	ELMOD3	chr2:clu_42653_NA	chr2:85604597-85616874	9.0804	3	0.000407505	0.0626287	0.0885632
Midbrain	UXS1	chr2:clu_43087_NA	chr2:106780166-106782512	7.71006	2	0.000448296	0.0648541	0.0494412
Midbrain	UXS1	chr2:clu_43087_NA	chr2:106780166-106782512	7.71006	2	0.000448296	0.0648541	-0.0652301
Midbrain	BIN1	chr2:clu_43303_NA	chr2:127808488-127816587	25.5589	11	3.93689e-07	0.00127476	-0.029294
Midbrain	PPIG	chr2:clu_43854_NA	chr2:170487497-170488285	7.44741	1	0.000113675	0.0329817	-0.0505305
Midbrain	PPIG	chr2:clu_43854_NA	chr2:170487497-170488285	7.44741	1	0.000113675	0.0329817	0.0505305
Midbrain	RPE	chr2:clu_44555_NA	chr2:210880836-210881231	6.5749	2	0.00139494	0.0991113	0.0481707
Midbrain	RPE	chr2:clu_44555_NA	chr2:210880836-210881231	6.5749	2	0.00139494	0.0991113	-0.103817
Midbrain	RPE	chr2:clu_44555_NA	chr2:210880836-210881231	6.5749	2	0.00139494	0.0991113	0.055646
Midbrain	PNKD	chr2:clu_44644_NA	chr2:219206867-219209178	7.0294	2	0.000885466	0.0859041	-0.0310065
Midbrain	PANK2	chr20:clu_45427_NA	chr20:3888782-3891224	8.88578	2	0.000138343	0.036397	0.112317
Midbrain	PANK2	chr20:clu_45427_NA	chr20:3888782-3891224	8.88578	2	0.000138343	0.036397	-0.112372
Midbrain	RIN2	chr20:clu_45629_NA	chr20:19941455-19951482	6.55874	2	0.00141767	0.0991248	0.0288531
Midbrain	RIN2	chr20:clu_45629_NA	chr20:19941455-19951482	6.55874	2	0.00141767	0.0991248	-0.0530274
Midbrain	DLGAP4	chr20:clu_45987_NA	chr20:35075340-35125108	10.3747	4	0.000355018	0.0583636	0.0347441
Midbrain	DLGAP4	chr20:clu_45987_NA	chr20:35075340-35125108	10.3747	4	0.000355018	0.0583636	-0.060515
Midbrain	RALGAPB	chr20:clu_46076_NA	chr20:37146643-37150140	6.60715	2	0.00135068	0.0983529	-0.0619152
Midbrain	RALGAPB	chr20:clu_46076_NA	chr20:37146643-37150140	6.60715	2	0.00135068	0.0983529	0.184611
Midbrain	RALGAPB	chr20:clu_46076_NA	chr20:37146643-37150140	6.60715	2	0.00135068	0.0983529	-0.122695
Midbrain	TOX2	chr20:clu_46157_NA	chr20:42543630-42602007	15.0976	10	0.000795881	0.0820867	0.042928
Midbrain	TOX2	chr20:clu_46157_NA	chr20:42543630-42602007	15.0976	10	0.000795881	0.0820867	-0.0701368
Midbrain	TOX2	chr20:clu_46157_NA	chr20:42543630-42602007	15.0976	10	0.000795881	0.0820867	-0.0324113
Midbrain	ELMO2	chr20:clu_46270_NA	chr20:45014914-45017678	8.92937	3	0.000470364	0.0657768	0.0256197
Midbrain	ELMO2	chr20:clu_46270_NA	chr20:45014914-45017678	8.92937	3	0.000470364	0.0657768	-0.0456996
Midbrain	RSPH1	chr21:clu_20362_NA	chr21:43896157-43916925	22.0316	16	0.000192935	0.0421808	0.0484998
Midbrain	RSPH1	chr21:clu_20362_NA	chr21:43896157-43916925	22.0316	16	0.000192935	0.0421808	-0.0456019
Midbrain	RSPH1	chr21:clu_20362_NA	chr21:43896157-43916925	22.0316	16	0.000192935	0.0421808	0.0387738
Midbrain	RSPH1	chr21:clu_20362_NA	chr21:43896157-43916925	22.0316	16	0.000192935	0.0421808	0.0284307
Midbrain	RSPH1	chr21:clu_20362_NA	chr21:43896157-43916925	22.0316	16	0.000192935	0.0421808	-0.029628
Midbrain	MIAT	chr22:clu_21010_NA	chr22:27042923-27062823	20.0189	12	7.08749e-05	0.0268331	0.0801004
Midbrain	MIAT	chr22:clu_21010_NA	chr22:27042923-27062823	20.0189	12	7.08749e-05	0.0268331	-0.103857
Midbrain	INPP5J	chr22:clu_21189_NA	chr22:31519105-31522362	13.684	4	1.67476e-05	0.0131643	-0.0302945
Midbrain	INPP5J	chr22:clu_21189_NA	chr22:31519105-31522362	13.684	4	1.67476e-05	0.0131643	0.165754
Midbrain	INPP5J	chr22:clu_21189_NA	chr22:31519105-31522362	13.684	4	1.67476e-05	0.0131643	-0.111213
Midbrain	HACL1	chr3:clu_49806_NA	chr3:15624496-15642597	17.2832	11	0.000292072	0.0542957	-0.0302903
Midbrain	HACL1	chr3:clu_49806_NA	chr3:15624496-15642597	17.2832	11	0.000292072	0.0542957	0.0503255
Midbrain	HACL1	chr3:clu_49806_NA	chr3:15624496-15642597	17.2832	11	0.000292072	0.0542957	-0.028952
Midbrain	HACL1	chr3:clu_49806_NA	chr3:15624496-15642597	17.2832	11	0.000292072	0.0542957	0.0360595
Midbrain	MAP4	chr3:clu_50351_NA	chr3:47969840-48040128	15.2987	7	7.37516e-05	0.0275858	0.036379
Midbrain	RBM5	chr3:clu_50578_NA	chr3:50140599-50142510	7.27386	2	0.00069343	0.0777167	-0.0285958
Midbrain	STAB1	chr3:clu_50783_NA	chr3:52555021-52555612	8.75566	2	0.000157566	0.0394156	0.0948792
Midbrain	STAB1	chr3:clu_50783_NA	chr3:52555021-52555612	8.75566	2	0.000157566	0.0394156	0.0404679
Midbrain	STAB1	chr3:clu_50783_NA	chr3:52555021-52555612	8.75566	2	0.000157566	0.0394156	-0.135347
Midbrain	FLNB	chr3:clu_50941_NA	chr3:58124256-58128377	10.0306	3	0.00016485	0.0398069	-0.0462649
Midbrain	FLNB	chr3:clu_50941_NA	chr3:58124256-58128377	10.0306	3	0.00016485	0.0398069	0.0822029
Midbrain	FLNB	chr3:clu_50941_NA	chr3:58124256-58128377	10.0306	3	0.00016485	0.0398069	-0.0450164
Midbrain	FHIT	chr3:clu_50975_NA	chr3:60807705-61186291	12.637	8	0.00139675	0.0991113	0.0568832
Midbrain	FHIT	chr3:clu_50975_NA	chr3:60807705-61186291	12.637	8	0.00139675	0.0991113	-0.0280406
Midbrain	ARL6IP5	chr3:clu_51074_NA	chr3:69134374-69153615	6.62863	2	0.00132197	0.0981002	-0.0310345
Midbrain	ARL6IP5	chr3:clu_51074_NA	chr3:69134374-69153615	6.62863	2	0.00132197	0.0981002	0.0316362
Midbrain	EIF4E3	chr3:clu_51102_NA	chr3:71759635-71777627	12.023	4	7.81949e-05	0.0285596	0.031954
Midbrain	EIF4E3	chr3:clu_51102_NA	chr3:71759635-71777627	12.023	4	7.81949e-05	0.0285596	-0.0289782
Midbrain	CPOX	chr3:clu_51206_NA	chr3:98292414-98304285	9.16081	1	1.86577e-05	0.0131643	0.0973767
Midbrain	CPOX	chr3:clu_51206_NA	chr3:98292414-98304285	9.16081	1	1.86577e-05	0.0131643	-0.0973767
Midbrain	LRRC58	chr3:clu_51452_NA	chr3:120053986-120067591	8.24443	3	0.000900122	0.0861579	0.02709
Midbrain	LRRC58	chr3:clu_51452_NA	chr3:120053986-120067591	8.24443	3	0.000900122	0.0861579	-0.0782312
Midbrain	LRRC58	chr3:clu_51452_NA	chr3:120053986-120067591	8.24443	3	0.000900122	0.0861579	0.0370502
Midbrain	GOLGB1	chr3:clu_51478_NA	chr3:121448864-121449723	5.94232	1	0.000565986	0.0717126	-0.126718
Midbrain	GOLGB1	chr3:clu_51478_NA	chr3:121448864-121449723	5.94232	1	0.000565986	0.0717126	0.126718
Midbrain	PLXND1	chr3:clu_51734_NA	chr3:129284381-129284741	5.50633	1	0.000904918	0.0861579	-0.0560037
Midbrain	PLXND1	chr3:clu_51734_NA	chr3:129284381-129284741	5.50633	1	0.000904918	0.0861579	0.0560037
Midbrain	TRPC1	chr3:clu_51990_NA	chr3:142467302-142521011	16.2743	12	0.00113804	0.0934668	-0.0263462
Midbrain	TRPC1	chr3:clu_51990_NA	chr3:142467302-142521011	16.2743	12	0.00113804	0.0934668	0.0455215
Midbrain	FXR1	chr3:clu_52337_NA	chr3:180630524-180651122	11.7705	4	9.87057e-05	0.0317912	0.027879
Midbrain	FXR1	chr3:clu_52337_NA	chr3:180630524-180651122	11.7705	4	9.87057e-05	0.0317912	-0.030869
Midbrain	CLCN2	chr3:clu_52470_NA	chr3:184075275-184075750	13.0793	3	8.83537e-06	0.0105229	0.163838
Midbrain	CLCN2	chr3:clu_52470_NA	chr3:184075275-184075750	13.0793	3	8.83537e-06	0.0105229	0.0906051
Midbrain	CLCN2	chr3:clu_52470_NA	chr3:184075275-184075750	13.0793	3	8.83537e-06	0.0105229	-0.0986339
Midbrain	CLCN2	chr3:clu_52470_NA	chr3:184075275-184075750	13.0793	3	8.83537e-06	0.0105229	-0.155809
Midbrain	ZFYVE28	chr4:clu_5316_NA	chr4:2321998-2339134	11.7436	3	3.19597e-05	0.0183739	0.0398059
Midbrain	ZFYVE28	chr4:clu_5316_NA	chr4:2321998-2339134	11.7436	3	3.19597e-05	0.0183739	0.0383388
Midbrain	ZFYVE28	chr4:clu_5316_NA	chr4:2321998-2339134	11.7436	3	3.19597e-05	0.0183739	-0.0645845
Midbrain	TBC1D19	chr4:clu_5698_NA	chr4:26661329-26667955	7.32356	2	0.000659812	0.0761482	-0.0283762
Midbrain	TBC1D19	chr4:clu_5698_NA	chr4:26661329-26667955	7.32356	2	0.000659812	0.0761482	0.0331678
Midbrain	GABRG1	chr4:clu_5859_NA	chr4:46086070-46125827	8.47367	1	3.84313e-05	0.0186422	0.159116
Midbrain	GABRG1	chr4:clu_5859_NA	chr4:46086070-46125827	8.47367	1	3.84313e-05	0.0186422	-0.159116
Midbrain	RP11-692D12.1	chr4:clu_6082_NA	chr4:74125043-74223329	14.5599	6	5.77441e-05	0.0239022	0.025253
Midbrain	RP11-692D12.1	chr4:clu_6082_NA	chr4:74125043-74223329	14.5599	6	5.77441e-05	0.0239022	-0.0491955
Midbrain	RP11-692D12.1	chr4:clu_6082_NA	chr4:74125043-74223329	14.5599	6	5.77441e-05	0.0239022	0.102153
Midbrain	RP11-692D12.1	chr4:clu_6082_NA	chr4:74125043-74223329	14.5599	6	5.77441e-05	0.0239022	0.0592125
Midbrain	RP11-692D12.1	chr4:clu_6082_NA	chr4:74125043-74223329	14.5599	6	5.77441e-05	0.0239022	-0.1274
Midbrain	RP11-692D12.1	chr4:clu_6082_NA	chr4:74125043-74223329	14.5599	6	5.77441e-05	0.0239022	-0.0268963
Midbrain	RASGEF1B	chr4:clu_6179_NA	chr4:82745724-82836464	6.57541	2	0.00139423	0.0991113	0.0552836
Midbrain	RASGEF1B	chr4:clu_6179_NA	chr4:82745724-82836464	6.57541	2	0.00139423	0.0991113	-0.119822
Midbrain	RASGEF1B	chr4:clu_6179_NA	chr4:82745724-82836464	6.57541	2	0.00139423	0.0991113	0.0645384
Midbrain	ANK2	chr4:clu_6580_NA	chr4:114232555-114238878	6.30682	1	0.000382943	0.0603475	-0.03267
Midbrain	ANK2	chr4:clu_6580_NA	chr4:114232555-114238878	6.30682	1	0.000382943	0.0603475	0.03267
Midbrain	LRP2BP	chr4:clu_7223_NA	chr4:186295394-186296767	9.77353	3	0.000210673	0.0437782	-0.045707
Midbrain	LRP2BP	chr4:clu_7223_NA	chr4:186295394-186296767	9.77353	3	0.000210673	0.0437782	0.0694939
Midbrain	FAM149A	chr4:clu_7256_NA	chr4:187026796-187070327	11.3539	6	0.000900479	0.0861579	-0.0426912
Midbrain	FAM149A	chr4:clu_7256_NA	chr4:187026796-187070327	11.3539	6	0.000900479	0.0861579	-0.050249
Midbrain	FAM149A	chr4:clu_7256_NA	chr4:187026796-187070327	11.3539	6	0.000900479	0.0861579	-0.10779
Midbrain	FAM149A	chr4:clu_7256_NA	chr4:187026796-187070327	11.3539	6	0.000900479	0.0861579	-0.0586828
Midbrain	FAM149A	chr4:clu_7256_NA	chr4:187026796-187070327	11.3539	6	0.000900479	0.0861579	0.254504
Midbrain	NSUN2	chr5:clu_15633_NA	chr5:6623398-6632712	9.14089	4	0.00108702	0.0924171	0.0972549
Midbrain	NSUN2	chr5:clu_15633_NA	chr5:6623398-6632712	9.14089	4	0.00108702	0.0924171	-0.0449547
Midbrain	NSUN2	chr5:clu_15633_NA	chr5:6623398-6632712	9.14089	4	0.00108702	0.0924171	-0.0611225
Midbrain	MTRR	chr5:clu_15656_NA	chr5:7869302-7875371	13.1171	6	0.000201342	0.0434074	0.0255449
Midbrain	MTRR	chr5:clu_15656_NA	chr5:7869302-7875371	13.1171	6	0.000201342	0.0434074	0.0420725
Midbrain	MTRR	chr5:clu_15656_NA	chr5:7869302-7875371	13.1171	6	0.000201342	0.0434074	-0.0411082
Midbrain	DROSHA	chr5:clu_15783_NA	chr5:31515326-31526186	10.1955	5	0.00105518	0.0906017	-0.0712948
Midbrain	DROSHA	chr5:clu_15783_NA	chr5:31515326-31526186	10.1955	5	0.00105518	0.0906017	0.0516754
Midbrain	PRKAA1	chr5:clu_15946_NA	chr5:40767792-40771821	8.37507	2	0.000230543	0.0467791	-0.0435001
Midbrain	PRKAA1	chr5:clu_15946_NA	chr5:40767792-40771821	8.37507	2	0.000230543	0.0467791	0.0251116
Midbrain	C5orf64	chr5:clu_16103_NA	chr5:61044522-61051659	11.8318	7	0.0013053	0.0981002	0.0489701
Midbrain	C5orf64	chr5:clu_16103_NA	chr5:61044522-61051659	11.8318	7	0.0013053	0.0981002	-0.0458466
Midbrain	C5orf64	chr5:clu_16103_NA	chr5:61044522-61051659	11.8318	7	0.0013053	0.0981002	-0.126661
Midbrain	C5orf64	chr5:clu_16103_NA	chr5:61044522-61051659	11.8318	7	0.0013053	0.0981002	0.100876
Midbrain	KIF2A	chr5:clu_16112_NA	chr5:61658368-61661070	5.20028	1	0.00125976	0.0978949	0.0592731
Midbrain	KIF2A	chr5:clu_16112_NA	chr5:61658368-61661070	5.20028	1	0.00125976	0.0978949	-0.0592731
Midbrain	RASGRF2	chr5:clu_16442_NA	chr5:80390811-80409357	7.95885	2	0.000349555	0.0583636	0.0496359
Midbrain	RASGRF2	chr5:clu_16442_NA	chr5:80390811-80409357	7.95885	2	0.000349555	0.0583636	-0.0548363
Midbrain	C5orf30	chr5:clu_16678_NA	chr5:102594597-102611598	13.0667	3	8.94308e-06	0.0105229	0.0349913
Midbrain	C5orf30	chr5:clu_16678_NA	chr5:102594597-102611598	13.0667	3	8.94308e-06	0.0105229	-0.0311035
Midbrain	APC	chr5:clu_16733_NA	chr5:112043346-112102023	18.8328	12	0.000174133	0.0402281	-0.0364891
Midbrain	APC	chr5:clu_16733_NA	chr5:112043346-112102023	18.8328	12	0.000174133	0.0402281	0.0329136
Midbrain	DCP2	chr5:clu_16745_NA	chr5:112312683-112328369	8.18669	3	0.000950629	0.0875736	-0.0797134
Midbrain	DCP2	chr5:clu_16745_NA	chr5:112312683-112328369	8.18669	3	0.000950629	0.0875736	-0.0348716
Midbrain	DCP2	chr5:clu_16745_NA	chr5:112312683-112328369	8.18669	3	0.000950629	0.0875736	0.112989
Midbrain	AFF4	chr5:clu_16970_NA	chr5:132272885-132298951	10.4928	2	2.77367e-05	0.016884	0.0374217
Midbrain	AFF4	chr5:clu_16970_NA	chr5:132272885-132298951	10.4928	2	2.77367e-05	0.016884	-0.0398793
Midbrain	PDGFRB	chr5:clu_17370_NA	chr5:149515441-149534960	13.7526	3	4.61288e-06	0.00795594	0.0404636
Midbrain	PDGFRB	chr5:clu_17370_NA	chr5:149515441-149534960	13.7526	3	4.61288e-06	0.00795594	-0.0576204
Midbrain	PANK3	chr5:clu_17598_NA	chr5:167993271-168006261	12.6663	2	3.15562e-06	0.00612289	-0.0499727
Midbrain	PANK3	chr5:clu_17598_NA	chr5:167993271-168006261	12.6663	2	3.15562e-06	0.00612289	0.0261563
Midbrain	C6orf52	chr6:clu_46885_NA	chr6:10671831-10694727	14.342	10	0.00140157	0.0991113	-0.127714
Midbrain	C6orf52	chr6:clu_46885_NA	chr6:10671831-10694727	14.342	10	0.00140157	0.0991113	0.0740879
Midbrain	C6orf52	chr6:clu_46885_NA	chr6:10671831-10694727	14.342	10	0.00140157	0.0991113	0.0285635
Midbrain	C6orf52	chr6:clu_46885_NA	chr6:10671831-10694727	14.342	10	0.00140157	0.0991113	-0.0312865
Midbrain	NELFE	chr6:clu_47385_NA	chr6:31922654-31922836	5.19185	1	0.00127132	0.0979358	-0.0282365
Midbrain	NELFE	chr6:clu_47385_NA	chr6:31922654-31922836	5.19185	1	0.00127132	0.0979358	0.0282365
Midbrain	XXbac-BPG154L12.4,XXbac-BPG154L12.5	chr6:clu_47432_NA	chr6:32223191-32357991	15.8978	7	4.43157e-05	0.0199388	-0.123385
Midbrain	XXbac-BPG154L12.4,XXbac-BPG154L12.5	chr6:clu_47432_NA	chr6:32223191-32357991	15.8978	7	4.43157e-05	0.0199388	0.121243
Midbrain	XXbac-BPG154L12.4,XXbac-BPG154L12.5	chr6:clu_47432_NA	chr6:32223191-32357991	15.8978	7	4.43157e-05	0.0199388	-0.0926639
Midbrain	XXbac-BPG154L12.4,XXbac-BPG154L12.5	chr6:clu_47432_NA	chr6:32223191-32357991	15.8978	7	4.43157e-05	0.0199388	-0.0825455
Midbrain	XXbac-BPG154L12.4,XXbac-BPG154L12.5	chr6:clu_47432_NA	chr6:32223191-32357991	15.8978	7	4.43157e-05	0.0199388	0.134259
Midbrain	PHF1	chr6:clu_47549_NA	chr6:33381231-33381818	9.93013	3	0.000181445	0.0408185	-0.0302541
Midbrain	DAAM2	chr6:clu_47765_NA	chr6:39851845-39855262	11.7022	4	0.000105122	0.0318695	-0.0381522
Midbrain	DAAM2	chr6:clu_47765_NA	chr6:39851845-39855262	11.7022	4	0.000105122	0.0318695	0.0847461
Midbrain	DAAM2	chr6:clu_47765_NA	chr6:39851845-39855262	11.7022	4	0.000105122	0.0318695	-0.0468924
Midbrain	MEA1	chr6:clu_47880_NA	chr6:42981127-42981800	7.99856	2	0.000335945	0.0575142	-0.0590997
Midbrain	MEA1	chr6:clu_47880_NA	chr6:42981127-42981800	7.99856	2	0.000335945	0.0575142	0.0593767
Midbrain	TMEM63B	chr6:clu_47983_NA	chr6:44102480-44104086	9.49154	4	0.000791981	0.0819568	-0.0751533
Midbrain	STXBP5	chr6:clu_49126_NA	chr6:147655358-147680220	12.8078	8	0.00122168	0.0967524	-0.0991932
Midbrain	STXBP5	chr6:clu_49126_NA	chr6:147655358-147680220	12.8078	8	0.00122168	0.0967524	0.035713
Midbrain	SYNJ2	chr6:clu_49272_NA	chr6:158476060-158483087	10.0955	5	0.00115067	0.0937603	-0.0356723
Midbrain	SYNJ2	chr6:clu_49272_NA	chr6:158476060-158483087	10.0955	5	0.00115067	0.0937603	0.0279827
Midbrain	INMT-MINDY4,MINDY4,RP5-877J2.1	chr7:clu_7808_NA	chr7:30890171-30893010	5.41535	1	0.000998304	0.0890998	0.140713
Midbrain	INMT-MINDY4,MINDY4,RP5-877J2.1	chr7:clu_7808_NA	chr7:30890171-30893010	5.41535	1	0.000998304	0.0890998	-0.140713
Midbrain	AMPH	chr7:clu_7936_NA	chr7:38530745-38574531	6.90758	2	0.00100017	0.0890998	-0.051434
Midbrain	AMPH	chr7:clu_7936_NA	chr7:38530745-38574531	6.90758	2	0.00100017	0.0890998	0.0491056
Midbrain	PGAM2	chr7:clu_8027_NA	chr7:44102529-44104715	8.21115	2	0.000271609	0.0517306	-0.0332476
Midbrain	VSTM2A	chr7:clu_8168_NA	chr7:54614688-54617531	7.03605	2	0.00087959	0.0859041	0.0383282
Midbrain	WBSCR27	chr7:clu_8369_NA	chr7:73249332-73256820	13.0537	8	0.00100674	0.0890998	-0.0594143
Midbrain	WBSCR27	chr7:clu_8369_NA	chr7:73249332-73256820	13.0537	8	0.00100674	0.0890998	-0.0362517
Midbrain	WBSCR27	chr7:clu_8369_NA	chr7:73249332-73256820	13.0537	8	0.00100674	0.0890998	0.0262528
Midbrain	WBSCR27	chr7:clu_8369_NA	chr7:73249332-73256820	13.0537	8	0.00100674	0.0890998	-0.0644341
Midbrain	WBSCR27	chr7:clu_8369_NA	chr7:73249332-73256820	13.0537	8	0.00100674	0.0890998	-0.134037
Midbrain	WBSCR27	chr7:clu_8369_NA	chr7:73249332-73256820	13.0537	8	0.00100674	0.0890998	0.0951689
Midbrain	WBSCR27	chr7:clu_8369_NA	chr7:73249332-73256820	13.0537	8	0.00100674	0.0890998	0.0994337
Midbrain	WBSCR27	chr7:clu_8369_NA	chr7:73249332-73256820	13.0537	8	0.00100674	0.0890998	0.0666682
Midbrain	RP11-395B7.4	chr7:clu_9003_NA	chr7:100657720-100660696	9.37215	4	0.000882254	0.0859041	-0.0845845
Midbrain	RP11-395B7.4	chr7:clu_9003_NA	chr7:100657720-100660696	9.37215	4	0.000882254	0.0859041	0.0254376
Midbrain	RP11-395B7.4	chr7:clu_9003_NA	chr7:100657720-100660696	9.37215	4	0.000882254	0.0859041	0.0649285
Midbrain	HILPDA,RP11-155G14.6,RP11-155G14.5,RP11-212P7.3,METTL2B	chr7:clu_9341_NA	chr7:128095963-128119212	29.1635	13	1.0441e-07	0.000786853	0.238969
Midbrain	HILPDA,RP11-155G14.6,RP11-155G14.5,RP11-212P7.3,METTL2B	chr7:clu_9341_NA	chr7:128095963-128119212	29.1635	13	1.0441e-07	0.000786853	0.0356488
Midbrain	HILPDA,RP11-155G14.6,RP11-155G14.5,RP11-212P7.3,METTL2B	chr7:clu_9341_NA	chr7:128095963-128119212	29.1635	13	1.0441e-07	0.000786853	-0.166346
Midbrain	HILPDA,RP11-155G14.6,RP11-155G14.5,RP11-212P7.3,METTL2B	chr7:clu_9341_NA	chr7:128095963-128119212	29.1635	13	1.0441e-07	0.000786853	-0.157279
Midbrain	CNOT4	chr7:clu_9486_NA	chr7:135082978-135095274	7.01959	1	0.00017904	0.0406156	0.249202
Midbrain	CNOT4	chr7:clu_9486_NA	chr7:135082978-135095274	7.01959	1	0.00017904	0.0406156	-0.249202
Midbrain	EPHB6	chr7:clu_9617_NA	chr7:142566494-142566730	5.17035	1	0.00130129	0.0981002	-0.0447507
Midbrain	EPHB6	chr7:clu_9617_NA	chr7:142566494-142566730	5.17035	1	0.00130129	0.0981002	0.0447507
Midbrain	ABCB8	chr7:clu_9799_NA	chr7:150733736-150737585	10.6969	4	0.000264529	0.0506933	-0.0364972
Midbrain	ABCB8	chr7:clu_9799_NA	chr7:150733736-150737585	10.6969	4	0.000264529	0.0506933	0.0367904
Midbrain	PPP3CC	chr8:clu_18261_NA	chr8:22333137-22370806	9.77915	4	0.000610316	0.0736109	0.057626
Midbrain	PPP3CC	chr8:clu_18261_NA	chr8:22333137-22370806	9.77915	4	0.000610316	0.0736109	-0.0666706
Midbrain	PEBP4	chr8:clu_18288_NA	chr8:22777823-22785097	6.61929	2	0.00133437	0.0981002	-0.0271503
Midbrain	TRIM35	chr8:clu_18369_NA	chr8:27146797-27151597	11.4417	2	1.07386e-05	0.0111126	0.0303847
Midbrain	AP3M2	chr8:clu_18625_NA	chr8:42025328-42026479	8.84011	2	0.000144807	0.0377776	-0.0320931
Midbrain	ST18	chr8:clu_18710_NA	chr8:53126817-53321888	31.1887	20	3.03361e-06	0.00612289	-0.0299143
Midbrain	ST18	chr8:clu_18710_NA	chr8:53126817-53321888	31.1887	20	3.03361e-06	0.00612289	-0.048148
Midbrain	ST18	chr8:clu_18710_NA	chr8:53126817-53321888	31.1887	20	3.03361e-06	0.00612289	0.0452966
Midbrain	TERF1	chr8:clu_18940_NA	chr8:73939287-73944277	6.94066	2	0.000967626	0.0882125	-0.0406648
Midbrain	TERF1	chr8:clu_18940_NA	chr8:73939287-73944277	6.94066	2	0.000967626	0.0882125	0.0403449
Midbrain	AB015752.3,TMEM64,LINC01030	chr8:clu_19083_NA	chr8:91546854-91715622	13.6484	9	0.001249	0.0978949	-0.130323
Midbrain	AB015752.3,TMEM64,LINC01030	chr8:clu_19083_NA	chr8:91546854-91715622	13.6484	9	0.001249	0.0978949	0.0966397
Midbrain	AB015752.3,TMEM64,LINC01030	chr8:clu_19083_NA	chr8:91546854-91715622	13.6484	9	0.001249	0.0978949	-0.0255088
Midbrain	ASAP1	chr8:clu_19481_NA	chr8:131172210-131179782	8.62799	3	0.000626032	0.07418	-0.0664415
Midbrain	ASAP1	chr8:clu_19481_NA	chr8:131172210-131179782	8.62799	3	0.000626032	0.07418	0.162932
Midbrain	ASAP1	chr8:clu_19481_NA	chr8:131172210-131179782	8.62799	3	0.000626032	0.07418	-0.0872162
Midbrain	ZFAT	chr8:clu_19539_NA	chr8:135545215-135596075	15.7491	4	2.42231e-06	0.00578467	-0.0268556
Midbrain	PTK2	chr8:clu_19578_NA	chr8:141771361-141774333	7.5482	2	0.00052706	0.0687503	-0.0586714
Midbrain	PTK2	chr8:clu_19578_NA	chr8:141771361-141774333	7.5482	2	0.00052706	0.0687503	0.121628
Midbrain	PTK2	chr8:clu_19578_NA	chr8:141771361-141774333	7.5482	2	0.00052706	0.0687503	-0.0629564
Midbrain	TSNARE1	chr8:clu_19613_NA	chr8:143396450-143435998	12.6263	7	0.000684392	0.0771953	0.051283
Midbrain	TSNARE1	chr8:clu_19613_NA	chr8:143396450-143435998	12.6263	7	0.000684392	0.0771953	0.0495278
Midbrain	TSNARE1	chr8:clu_19613_NA	chr8:143396450-143435998	12.6263	7	0.000684392	0.0771953	-0.0563679
Midbrain	TSNARE1	chr8:clu_19613_NA	chr8:143396450-143435998	12.6263	7	0.000684392	0.0771953	-0.0468208
Midbrain	TSNARE1	chr8:clu_19613_NA	chr8:143396450-143435998	12.6263	7	0.000684392	0.0771953	-0.0271636
Midbrain	PLEC	chr8:clu_19741_NA	chr8:145012408-145012799	6.71526	2	0.00121227	0.0964985	-0.0634092
Midbrain	PLEC	chr8:clu_19741_NA	chr8:145012408-145012799	6.71526	2	0.00121227	0.0964985	0.138764
Midbrain	PLEC	chr8:clu_19741_NA	chr8:145012408-145012799	6.71526	2	0.00121227	0.0964985	-0.0753553
Midbrain	DENND4C	chr9:clu_38989_NA	chr9:19290874-19298054	7.28421	2	0.000686291	0.0771953	0.0347509
Midbrain	DENND4C	chr9:clu_38989_NA	chr9:19290874-19298054	7.28421	2	0.000686291	0.0771953	-0.0383276
Midbrain	FOCAD	chr9:clu_39021_NA	chr9:20885229-20912865	7.05598	2	0.00086224	0.0849425	0.0331969
Midbrain	UNC13B	chr9:clu_39218_NA	chr9:35400440-35403164	8.03061	2	0.000325351	0.0575142	-0.0660573
Midbrain	UNC13B	chr9:clu_39218_NA	chr9:35400440-35403164	8.03061	2	0.000325351	0.0575142	0.165645
Midbrain	UNC13B	chr9:clu_39218_NA	chr9:35400440-35403164	8.03061	2	0.000325351	0.0575142	-0.099588
Midbrain	GLIDR	chr9:clu_39356_NA	chr9:41923584-41954749	20.0089	11	3.55249e-05	0.0186422	0.0275628
Midbrain	GLIDR	chr9:clu_39356_NA	chr9:41923584-41954749	20.0089	11	3.55249e-05	0.0186422	-0.0773316
Midbrain	NMRK1	chr9:clu_39509_NA	chr9:77692496-77702924	13.6301	9	0.00126662	0.0978949	-0.0288875
Midbrain	NMRK1	chr9:clu_39509_NA	chr9:77692496-77702924	13.6301	9	0.00126662	0.0978949	0.0261502
Midbrain	CARD19	chr9:clu_39737_NA	chr9:95870098-95874500	26.2138	11	2.28069e-07	0.00101149	0.0351169
Midbrain	CARD19	chr9:clu_39737_NA	chr9:95870098-95874500	26.2138	11	2.28069e-07	0.00101149	-0.0454044
Midbrain	CARD19	chr9:clu_39737_NA	chr9:95870098-95874500	26.2138	11	2.28069e-07	0.00101149	0.0502675
Midbrain	CARD19	chr9:clu_39737_NA	chr9:95870098-95874500	26.2138	11	2.28069e-07	0.00101149	-0.0450038
Midbrain	ANKS6	chr9:clu_39924_NA	chr9:101546439-101547114	8.04216	2	0.000321614	0.0575142	0.134226
Midbrain	ANKS6	chr9:clu_39924_NA	chr9:101546439-101547114	8.04216	2	0.000321614	0.0575142	-0.153698
Midbrain	TMEM246-AS1,RNF20	chr9:clu_39976_NA	chr9:104230890-104297680	12.2241	4	6.4942e-05	0.0258478	-0.0483887
Midbrain	CDC26	chr9:clu_40130_NA	chr9:115985605-116035609	14.3962	10	0.00134622	0.0983375	0.0295935
Midbrain	LRSAM1	chr9:clu_40443_NA	chr9:130251797-130255081	10.1703	2	3.82919e-05	0.0186422	0.0600889
Midbrain	LRSAM1	chr9:clu_40443_NA	chr9:130251797-130255081	10.1703	2	3.82919e-05	0.0186422	-0.094756
Midbrain	LRSAM1	chr9:clu_40443_NA	chr9:130251797-130255081	10.1703	2	3.82919e-05	0.0186422	0.0346672
Midbrain	SLC25A25	chr9:clu_40499_NA	chr9:130863675-130864649	10.4441	2	2.91183e-05	0.0171574	-0.0631964
Midbrain	SLC25A25	chr9:clu_40499_NA	chr9:130863675-130864649	10.4441	2	2.91183e-05	0.0171574	0.119825
Midbrain	SLC25A25	chr9:clu_40499_NA	chr9:130863675-130864649	10.4441	2	2.91183e-05	0.0171574	-0.0566287
Midbrain	DPH7	chr9:clu_41146_NA	chr9:140459606-140473077	18.99	15	0.00090845	0.0861579	-0.0264318
Midbrain	DPH7	chr9:clu_41146_NA	chr9:140459606-140473077	18.99	15	0.00090845	0.0861579	0.0420702
Midbrain	DPH7	chr9:clu_41146_NA	chr9:140459606-140473077	18.99	15	0.00090845	0.0861579	-0.0261613
Midbrain	CDKL5	chrX:clu_10143_NA	chrX:18528974-18593474	6.59407	2	0.00136846	0.0985702	0.0361346
Midbrain	CDKL5	chrX:clu_10143_NA	chrX:18528974-18593474	6.59407	2	0.00136846	0.0985702	-0.0976908
Midbrain	CDKL5	chrX:clu_10143_NA	chrX:18528974-18593474	6.59407	2	0.00136846	0.0985702	0.0615562
Midbrain	GK	chrX:clu_10240_NA	chrX:30714800-30718531	9.1773	2	0.00010336	0.0318695	-0.0681925
Midbrain	GK	chrX:clu_10240_NA	chrX:30714800-30718531	9.1773	2	0.00010336	0.0318695	0.0299798
Midbrain	GK	chrX:clu_10240_NA	chrX:30714800-30718531	9.1773	2	0.00010336	0.0318695	0.0382127
Midbrain	DMD	chrX:clu_10261_NA	chrX:32867937-33357376	9.78847	4	0.000605174	0.0736109	-0.0887107
Midbrain	DMD	chrX:clu_10261_NA	chrX:32867937-33357376	9.78847	4	0.000605174	0.0736109	0.0566663
Midbrain	LAS1L	chrX:clu_10660_NA	chrX:64738345-64743440	14.9957	9	0.000440217	0.0647704	0.0394485
Midbrain	PHKA1	chrX:clu_10772_NA	chrX:71839155-71842959	7.78874	2	0.000414376	0.0630603	0.155077
Midbrain	PHKA1	chrX:clu_10772_NA	chrX:71839155-71842959	7.78874	2	0.000414376	0.0630603	-0.141911
Midbrain	ARMCX3	chrX:clu_10914_NA	chrX:100878266-100879148	9.30584	4	0.000936721	0.0873288	-0.031012
Midbrain	ARMCX3	chrX:clu_10914_NA	chrX:100878266-100879148	9.30584	4	0.000936721	0.0873288	0.0506936
Midbrain	BCAP31	chrX:clu_11449_NA	chrX:152988743-152989942	12.7539	7	0.000616487	0.0736109	0.0355873
Midbrain	USP9Y	chrY:clu_19933_NA	chrY:14885859-14888583	6.93356	2	0.000974528	0.0882125	-0.119682
Midbrain	USP9Y	chrY:clu_19933_NA	chrY:14885859-14888583	6.93356	2	0.000974528	0.0882125	-0.0253956
Midbrain	USP9Y	chrY:clu_19933_NA	chrY:14885859-14888583	6.93356	2	0.000974528	0.0882125	0.145078

## Sheet: Supplementary File S2
Brain	Gene	Cluster	Coordinates	p	p.adjust	Functions	Events	Conserved_in_Flies
NAc	ADAM15	chr1:clu_22684_NA	chr1:155032819-155034721	0.00175368	0.0992228	13679040 (HsaALTA0000204-2/2); 13679040 (HsaALTA0000204-1/2); 19718658 (HsaEX0002286); 13679040 (HsaEX0002288); 19718658 (HsaEX0002288); 19718658 (HsaEX0002288); 13679040 (HsaEX0002290); 19718658 (HsaEX0002290)	HsaALTA0000204-2/2; HsaALTD0000146-2/2; HsaEX0002282; HsaEX0002287; HsaEX0002289; HsaINT0003541; HsaINT0003543; HsaEX6033830; HsaALTA0000204-1/2; HsaALTD0000146-1/2; HsaINT0003542; HsaINT0003545; HsaEX0002286; HsaEX0002288; HsaEX0002290; HsaEX6033831; HsaINT0003540	NA
Midbrain	AIFM2,TYSND1	chr10:clu_34847_NA	chr10:71883853-71912019	0.000167972	0.0398069	PMID:_20213681 (HsaEX6088763)	HsaEX0068538; HsaINT0175895; HsaEX0068537; HsaEX6088763; HsaEX6088771; HsaINT0144925; HsaINT0006016; HsaEX6088764; HsaEX0003292	NA
Midbrain	ANP32B	chr9:clu_39894_NA	chr9:100767435-100773553	0.000100355	0.0317912	PMID:_32574681 (HsaEX6062099)	HsaALTA0000486-1/3; HsaALTA0000486-3/3; HsaEX0004688; HsaINT0009536; HsaALTA0000486-2/3; HsaALTA0000485-1/2; HsaEX6062099; HsaALTA0000485-2/2; HsaEX6062098; HsaINT0009537; HsaEX0004687	HsaEX6062099
NAc	AP3B1	chr5:clu_14674_NA	chr5:77335098-77385217	0.000265759	0.0359485	10655490 (HsaEX6098821)	HsaEX0004939; HsaINT0010121; HsaEX6098821; HsaEX6098823; HsaEX6098824; HsaEX6098822; HsaINT0010120; HsaINT0010122	NA
NAc	APC	chr5:clu_15068_NA	chr5:112043346-112102023	0.000771955	0.0649013	11035805 (HsaEX0005101); 11035805 (HsaEX6099445); 11035805 (HsaEX0005097); 12070164 (HsaEX0005097)	HsaALTD0000395-1/2; HsaEX0005093; HsaEX0005094; HsaALTD0000395-2/2; HsaINT0010390; HsaEX0005101; HsaINT0010396; HsaEX6099445; HsaINT0010395; HsaEX0005097	NA
Midbrain	APC	chr5:clu_16733_NA	chr5:112043346-112102023	0.000174133	0.0402281	PMID:_11035805 (HsaEX0005101); PMID: 11035805 (HsaEX6099445); PMID: 11035805 (HsaEX0005097); PMID: 12070164 (HsaEX0005097)	HsaALTD0000395-1/2; HsaEX0005093; HsaEX0005094; HsaALTD0000395-2/2; HsaINT0010390; HsaEX0005101; HsaINT0010396; HsaEX6099445; HsaINT0010395; HsaEX0005097	NA
NAc	ARIH2	chr3:clu_43944_NA	chr3:48956431-49002352	0.000802785	0.06642	31911676 (HsaEX0005839)	HsaALTA0000641-2/2; HsaEX6055905; HsaALTD0000456-2/2; HsaEX0005833; HsaEX0005838; HsaEX0005840; HsaINT0012348; HsaALTA0000641-1/2; HsaINT0012340; HsaALTD0000456-1/2; HsaEX0005832; HsaEX0005837; HsaEX0005839; HsaINT0012350; HsaEX0005841	NA
NAc	BEST1	chr11:clu_47157_NA	chr11:61717899-61722579	0.000760416	0.064327	24341532 (HsaEX0008030)	HsaINT0017528; HsaEX0008030; HsaEX6002369; HsaEX0008031; HsaINT0017529; HsaINT0017530; HsaEX0008032; HsaEX0008029; HsaEX0008033	HsaEX0008032
dlPFC	BIN1	chr2:clu_35587_NA	chr2:127808488-127816587	2.58e-05	0.0168975	9603201 (HsaEX0008095); 9603201 (HsaEX0008095); 29769303 (HsaEX0008097); 9603201 (HsaEX0008093); 15992821 (HsaEX0008093); 32249828 (HsaEX0008093); 15992821 (HsaEX0008093); 9603201 (HsaEX0008094); 9603201 (HsaEX0008094); 9603201 (HsaEX0008096); 21623381 (HsaEX0008091); 21623381 (HsaEX0008091); 12183633 (HsaEX0008091); 15483625 (HsaEX0008091)	HsaEX0008095; HsaEX0008097; HsaINT0017704; HsaINT0017706; HsaINT0017705; HsaEX0008093; HsaEX0008094; HsaEX0008096; HsaEX0008090; HsaEX0008099; HsaINT0017715; HsaEX6015371; HsaINT0017707; HsaEX0008091; HsaEX0008098	NA
NAc	BIN1	chr2:clu_37489_NA	chr2:127808488-127816587	6.27994e-15	8.57965e-11	9603201 (HsaEX0008095); 9603201 (HsaEX0008095); 29769303 (HsaEX0008097); 9603201 (HsaEX0008093); 15992821 (HsaEX0008093); 32249828 (HsaEX0008093); 15992821 (HsaEX0008093); 9603201 (HsaEX0008094); 9603201 (HsaEX0008094); 9603201 (HsaEX0008096); 21623381 (HsaEX0008091); 21623381 (HsaEX0008091); 12183633 (HsaEX0008091); 15483625 (HsaEX0008091)	HsaEX0008095; HsaEX0008097; HsaINT0017704; HsaINT0017706; HsaINT0017705; HsaEX0008093; HsaEX0008094; HsaEX0008096; HsaEX0008090; HsaEX0008099; HsaINT0017715; HsaEX6015371; HsaINT0017707; HsaEX0008091; HsaEX0008098	HsaEX0008099
Midbrain	BIN1	chr2:clu_43303_NA	chr2:127808488-127816587	3.94e-07	0.00127476	PMID:_9603201 (HsaEX0008095); PMID: 9603201 (HsaEX0008095); PMID: 29769303 (HsaEX0008097); PMID: 9603201 (HsaEX0008093); PMID: 15992821 (HsaEX0008093); PMID: 32249828 (HsaEX0008093); PMID: 15992821 (HsaEX0008093); PMID: 9603201 (HsaEX0008094); PMID: 9603201 (HsaEX0008094); PMID: 9603201 (HsaEX0008096); PMID: 21623381 (HsaEX0008091); PMID: 21623381 (HsaEX0008091); PMID: 12183633 (HsaEX0008091); PM…	HsaEX0008095; HsaEX0008097; HsaINT0017704; HsaINT0017706; HsaINT0017705; HsaEX0008093; HsaEX0008094; HsaEX0008096; HsaEX0008090; HsaEX0008099; HsaINT0017715; HsaEX6015371; HsaINT0017707; HsaEX0008091; HsaEX0008098	HsaEX0008099
dlPFC	CADPS2	chr7:clu_7737_NA	chr7:122377122-122526053	0.000510882	0.0767733	17380209 (HsaEX0012142)	HsaINT0026750; HsaEX6010186; HsaEX0012142	HsaEX0012142Â
dlPFC	CAMK2G	chr10:clu_28782_NA	chr10:75597269-75601927	3.66e-08	0.00047814	12603201 (HsaEX0012232); 12603201 (HsaEX0012231); 10820218 (HsaEX0012231)	HsaEX6089007; HsaINT0027076; HsaINT0027077; HsaEX0012232; HsaEX0012231; HsaEX0012240; HsaEX6089006; HsaEX6089008; HsaINT0027075; HsaEX0012230; HsaEX0012237; HsaEX0012239	HsaEX0012232; HsaEX6089006; HsaEX0012239
dlPFC	CLTA	chr9:clu_32038_NA	chr9:36190908-36204065	0.000730587	0.0909686	22749401 (HsaEX0015809)	HsaALTA0001941-1/2; HsaEX6061266; HsaINT0036719; HsaINT0036720; HsaINT0036718; HsaEX0015808; HsaEX0015808; HsaEX0015809; HsaALTA0001942-1/2; HsaEX6061265; HsaINT0036721; HsaEX0015810	NA
NAc	CLTA	chr9:clu_33793_NA	chr9:36190908-36204065	2.33718e-06	0.00159653	22749401 (HsaEX0015809)	HsaALTA0001941-1/2; HsaEX6061266; HsaINT0036719; HsaINT0036720; HsaINT0036718; HsaEX0015808; HsaEX6061264; HsaEX0015809; HsaALTA0001942-1/2; HsaEX6061265; HsaINT0036721; HsaEX0015810	NA
Midbrain	CPSF4	chr7:clu_8841_NA	chr7:99048418-99049991	6.15e-06	0.00875603	PMID:_31911676 (HsaEX6009256)	HsaINT0040976; HsaINT0040977; HsaEX0017067; HsaALTA0002137-2/2; HsaEX6009255; HsaEX6009257; HsaINT0040978; HsaEX6009256; HsaALTA0002137-1/2; HsaINT0040975	NA
Midbrain	CREM	chr10:clu_34405_NA	chr10:35416121-35495823	5.27e-06	0.00861126	PMID:_7809053 (HsaEX0017225); PMID: 1370576 (HsaEX0017227); PMID: 7809053 (HsaEX0017227); PMID: 7809053 (HsaEX0017226)	HsaALTA0002158-2/2; HsaALTD0001674-2/2; HsaALTD0001675-1/2; HsaEX0017220; HsaEX0017222; HsaEX0017225; HsaEX0017227; HsaINT0041410; HsaINT0041412; HsaALTA0002158-1/2; HsaINT0041409; HsaINT0041411; HsaALTD0001674-1/2; HsaALTD0001675-2/2; HsaEX0017223; HsaEX0017224; HsaEX0017226; HsaALTA0002159-1/2; HsaALTA0002159-2/2; HsaEX0017221; HsaEX0017228	HsaEX0017227
dlPFC	DDX3X	chrX:clu_8610_NA	chrX:41196718-41200737	7.57e-05	0.0278835	17667941 (HsaEX0018928)	HsaINT0046185; HsaEX0018927; HsaEX0018928; HsaINT0046184; HsaEX6051382; HsaEX6051381; HsaEX6051383; HsaINT0046177; HsaINT0046186	NA
NAc	DNM2	chr19:clu_24892_NA	chr19:10906115-10909162	0.000340919	0.0417725	20127478 (HsaEX0020457); 10780938 (HsaEX0020457); 15811383 (HsaEX0020457); 18003703 (HsaEX0020457); 18923138 (HsaEX0020457); 20127478 (HsaEX0020456); 10780938 (HsaEX0020456); 15811383 (HsaEX0020456); 18003703 (HsaEX0020456); 18923138 (HsaEX0020456)	HsaINT0050670; HsaALTD0001984-2/2; HsaEX0020457; HsaALTD0001984-1/2; HsaEX0020456; HsaINT0050687; HsaINT0050686; HsaEX6092933; HsaEX6092934; HsaEX6092936; HsaEX6092935; HsaINT0050671	NA
NAc	EIF4G1	chr3:clu_45879_NA	chr3:184041029-184041196	4.7477e-05	0.0127182	7651417 (HsaEX6059906); 14675538 (HsaEX6059906)	HsaALTA0002848-2/2; HsaEX6059903; HsaEX6059904; HsaEX6059906; HsaEX0022041; HsaINT0055316; HsaINT0055318; HsaEX6059905; HsaALTA0002848-1/2; HsaINT0055317; HsaINT0055319; HsaINT0055320; HsaEX6059908; HsaEX6059902; HsaEX6059907; HsaINT0055298; HsaINT0055315	NA
dlPFC	EPB41	chr1:clu_19412_NA	chr1:29379824-29391494	3.69e-05	0.0219441	11274145 (HsaEX0022625); 11274145 (HsaEX0022623); 11274145 (HsaEX0022624)	HsaEX0022625; HsaINT0056691; HsaEX0022623; HsaEX0022624; HsaEX6029587; HsaEX6029589; HsaEX0022612; HsaEX0022619; HsaEX6029588; HsaINT0056690; HsaEX0022618	HsaEX6029587; HsaEX0022619; HsaEX6029588
Midbrain	ERBB2	chr17:clu_3253_NA	chr17:37873733-37879572	3.7e-05	0.0186422	PMID:_8096058 (HsaINT0057487); PMID: 9808159 (HsaEX0022934); PMID: 16601290 (HsaEX0022934); PMID: 19671734 (HsaEX0022934); PMID: 21559085 (HsaEX0022934); PMID: 23867476 (HsaEX0022934); PMID: 25164009 (HsaEX0022934); PMID: 26367347 (HsaEX0022934); PMID: 27475932 (HsaEX0022934); PMID: 27641338 (HsaEX0022934); PMID: 28903354 (HsaEX0022934); PMID: 31261614 (HsaEX0022934)	HsaALTA0002969-2/2; HsaEX6022380; HsaEX6022382; HsaALTD0002276-2/3; HsaINT0057487; HsaINT0057491; HsaEX6022381; HsaALTA0002969-1/2; HsaINT0057486; HsaINT0057488; HsaINT0057490; HsaALTD0002276-1/3; HsaALTD0002276-3/3; HsaEX0022934; HsaEX0022935; HsaINT0057485; HsaEX6022379; HsaEX6022383; HsaINT0057492; HsaEX0022933	HsaEX0022933
NAc	FGFR2	chr10:clu_31173_NA	chr10:123263455-123274637	0.0012059	0.0811577	1309608 (HsaEX0025679); 16436388 (HsaEX0025679); 17086194 (HsaEX0025679); 20094046 (HsaEX0025679); 21876469 (HsaEX0025679); 26713601 (HsaEX0025679); 28757146 (HsaEX0025679); 29068468 (HsaEX0025679); 31911676 (HsaEX0025679); 8582274 (HsaEX0025679); 9013630 (HsaEX0025679); 16597617 (HsaEX0025679); 18337450 (HsaEX0025679)	HsaALTD0002554-1/2; HsaINT0063954; HsaALTD0002554-2/2; HsaEX0025679; HsaINT0063955	NA
Midbrain	FLNB	chr3:clu_50941_NA	chr3:58124256-58128377	0.00016485	0.0398069	PMID:_11807098 (HsaEX0025930); PMID: 30059005 (HsaEX0025930)	HsaEX6056833; HsaALTD0002597-2/2; HsaEX0025930; HsaINT0064858; HsaINT0064857; HsaALTD0002597-1/2; HsaALTA0003388-1/2; HsaEX6056834; HsaEX0025935; HsaEX6056835; HsaALTA0003388-2/2; HsaINT0064855; HsaINT0064859; HsaEX0025931	HsaEX6056833; HsaEX0025930; HsaEX0025935
dlPFC	FUBP1	chr1:clu_20459_NA	chr1:78433887-78435609	1.3e-05	0.0125978	31911676 (HsaEX0026562); 20711187 (HsaEX6031727)	HsaEX6031728; HsaEX0026562; HsaINT0066541; HsaALTA0003495-1/2; HsaEX6031730; HsaINT0066530; HsaINT0066543; HsaEX6031727; HsaEX6031729; HsaALTA0003495-2/2	NA
NAc	FUBP1	chr1:clu_21594_NA	chr1:78433887-78435609	0.000465217	0.0500456	31911676 (HsaEX0026562); 20711187 (HsaEX6031727)	HsaEX6031728; HsaEX0026562; HsaINT0066541; HsaALTA0003495-1/2; HsaEX6031730; HsaINT0066530; HsaINT0066543; HsaEX6031727; HsaEX6031729; HsaALTA0003495-2/2	NA
NAc	GAB1,SMARCA5	chr4:clu_5905_NA	chr4:144387378-144438508	0.00012262	0.0224865	10978177 (HsaEX6086318)	HsaINT0154881; HsaINT0066970; HsaALTA0003519-1/2; HsaEX6086318; HsaEX6086343; HsaINT0154892; HsaINT0066969; HsaALTA0003519-2/2; HsaEX6086317; HsaEX6086342	HsaEX6086343; HsaEX6086342
dlPFC	GRB10	chr7:clu_6743_NA	chr7:50694675-50742133	0.000142509	0.0368943	15952796 (HsaEX0028560)	HsaINT0072124; HsaINT0072125; HsaEX0028560; HsaEX0028549; HsaEX0028558; HsaINT0072123; HsaINT0072126; HsaEX6008275; HsaEX0028550; HsaEX0028559	NA
dlPFC	GTF2I	chr7:clu_6965_NA	chr7:74131270-74143124	0.000496145	0.0754256	17052463 (HsaEX0028969)	HsaEX0028969; HsaEX6008497; HsaEX0028968; HsaEX6008498; HsaINT0073325; HsaEX0028960; HsaEX0028962	NA
NAc	GTF2I	chr7:clu_7349_NA	chr7:74125440-74131214	3.19701e-05	0.00981518	17052463 (HsaEX0028969)	HsaALTA0003841-1/3; HsaALTA0003841-3/3; HsaEX0028968; HsaALTA0003841-2/3; HsaINT0073325; HsaEX0028960; HsaEX6008499; HsaEX6008500; HsaINT0073324; HsaEX6008498; HsaEX0028969	NA
Midbrain	HIPK2	chr7:clu_9545_NA	chr7:139260034-139268563	8.46e-05	0.0295557	PMID:_12565818 (HsaEX6010838); PMID: 21192925 (HsaEX6010838)	HsaEX0030003; HsaINT0076248; HsaEX6010838; HsaEX6010840; HsaINT0076247; HsaINT0076249; HsaEX6010839; HsaEX0030002	NA
dlPFC	HNRNPD	chr4:clu_4962_NA	chr4:83276554-83277949	6.4e-05	0.0262487	29263134 (HsaEX0030286)	HsaALTD0003087-2/3; HsaINT0076999; HsaINT0077000; HsaALTD0003087-1/3; HsaALTD0003087-3/3; HsaEX0030286; HsaINT0077001; HsaINT0076998	NA
NAc	HRAS	chr11:clu_46192_NA	chr11:532630-533453	4.38259e-05	0.0121527	16436381 (HsaEX0030476)	HsaEX6000093; HsaALTA0004101-1/2; HsaINT0077528; HsaINT0077530; HsaALTA0004101-2/2; HsaEX6000092; HsaEX0030476; HsaINT0077527; HsaINT0077529; HsaINT0077526; HsaEX0030475	NA
Midbrain	KCNMA1	chr10:clu_35062_NA	chr10:78669854-78674694	9.3e-05	0.0307126	PMID:_10651830 (HsaEX0033055); PMID: 18667155 (HsaEX0033055); PMID: 19940072 (HsaEX0033055); PMID: 26277265 (HsaEX0033055)	HsaINT0084550; HsaEX0033055; HsaEX6089074; HsaEX6089076; HsaEX0033056; HsaEX6089075; HsaINT0084549; HsaINT0084551	HsaEX0033056; HsaEX6089075
NAc	LDB2	chr4:clu_4675_NA	chr4:16504496-16510164	0.00123387	0.082431	16815859 (HsaEX0035557); 32249828 (HsaEX0035557)	HsaALTA0004720-2/2; HsaALTA0004720-1/2; HsaINT0091142; HsaALTA0004719-2/2; HsaEX6083706; HsaALTD0003571-1/2; HsaINT0091141; HsaINT0091143; HsaALTA0004719-1/2; HsaEX6083705; HsaALTD0003571-2/2; HsaEX0035557	NA
Midbrain	LIPE-AS1	chr19:clu_29794_NA	chr19:42901376-43155239	0.00021141	0.0437782	PMID:_9135071 (HsaEX0014463); PMID: 9867848 (HsaEX0014463); PMID: 12522268 (HsaEX0014463); PMID: 21398516 (HsaEX0014463); PMID: 21413011 (HsaEX0014463)	HsaALTA0001752-1/2; HsaEX6095439; HsaEX6095441; HsaEX6095443; HsaEX6095444; HsaEX6095446; HsaEX6095448; HsaEX6095450; HsaINT0032916; HsaINT0032918; HsaINT0032996; HsaINT0043689; HsaINT0043691; HsaEX0000839; HsaEX0000841; HsaINT0092161; HsaINT0092163; HsaINT0092164; HsaINT0092166; HsaINT0092168; HsaEX0014463; HsaEX0014464; HsaEX0014466; HsaEX0014468; HsaEX0035918	NA
dlPFC	MAPT	chr17:clu_2998_NA	chr17:44074030-44091609	1.98e-06	0.00412821	2516729 (HsaEX0037851); 9190213 (HsaEX0037851); 12505985 (HsaEX0037851); 15671021 (HsaEX0037851); 16115884 (HsaEX0037851); 20520830 (HsaEX0037851); 28053030 (HsaEX0037851); 28502805 (HsaEX0037851); 32290247 (HsaEX0037851); 11160831 (HsaEX0037851); 12886013 (HsaEX0037851); 29669277 (HsaEX0037851); 9763511 (HsaEX6023211); 10391244 (HsaEX6023211); 18467332 (HsaEX6023211)	HsaEX0037851; HsaEX6023210; HsaEX6023212; HsaEX6023209; HsaEX6023211; HsaEX6023213	NA
NAc	MEGF8	chr19:clu_25888_NA	chr19:42848985-42854300	0.000478071	0.0502176	32249828 (HsaEX0038772)	HsaEX0038772; HsaEX6095428; HsaINT0101851; HsaINT0101853; HsaINT0101850; HsaEX0038771; HsaEX6095429; HsaEX6095430; HsaINT0101854; HsaINT0101888; HsaEX0038765; HsaEX6095427; HsaEX6095431	NA
NAc	MLF1	chr3:clu_45546_NA	chr3:158289136-158314651	0.000194443	0.0305109	22151054 (HsaEX0039425)	HsaEX6059272; HsaALTD0003934-1/2; HsaALTD0003935-2/2; HsaINT0103373; HsaEX0039425; HsaEX0039423; HsaEX0039424; HsaEX0039426; HsaEX6059271; HsaALTD0003934-2/2; HsaALTD0003935-1/2; HsaINT0103372; HsaEX6059270; HsaINT0103374; HsaEX6059269	NA
Midbrain	MSRA	chr8:clu_18040_NA	chr8:9912168-10285658	1.03e-05	0.01106	PMID:_31911676 (HsaEX0040338)	HsaINT0105674; HsaINT0105676; HsaINT0105678; HsaEX0040336; HsaEX0040338; HsaEX0040340; HsaEX0040335; HsaEX0040337; HsaEX0040339; HsaINT0105675; HsaINT0105677	NA
NAc	MTMR12	chr5:clu_14077_NA	chr5:32230453-32239107	8.77774e-06	0.00419683	12847286 (HsaEX0040581); 12847286 (HsaEX0040582)	HsaEX0040581; HsaINT0106199; HsaINT0106200; HsaINT0106198; HsaINT0106201; HsaEX0040582; HsaEX6097593; HsaEX0040577; HsaEX0040583	NA
NAc	NCAM1	chr11:clu_48257_NA	chr11:113085233-113102367	0.00121819	0.0817836	8163558 (HsaEX0041923); 1574117 (HsaEX0041923); 15884017 (HsaEX0041923)	HsaINT0110781; HsaEX6004720; HsaINT0110780; HsaEX0041923; HsaEX0041924; HsaEX6004718; HsaEX6004721; HsaINT0110779; HsaEX6004719; HsaEX6004722; HsaINT0110765	NA
dlPFC	NISCH	chr3:clu_41898_NA	chr3:52514311-52518529	0.000770765	0.0924494	31911676 (HsaEX0043017)	HsaINT0113699; HsaEX0043017; HsaEX6056439; HsaINT0113698; HsaEX6056438; HsaEX6056440; HsaINT0113697; HsaINT0113700; HsaEX0043013; HsaEX0043014; HsaEX6056441	NA
NAc	NLGN3	chrX:clu_9454_NA	chrX:70368056-70375064	8.34872e-05	0.0186196	20624592 (HsaEX0043079); 28817804 (HsaEX0043079); 20624592 (HsaEX0043078); 28817804 (HsaEX0043078)	HsaEX0043079; HsaINT0113854; HsaEX0043078; HsaEX6052261; HsaEX6052263; HsaINT0113855; HsaEX6052262; HsaINT0113853	NA
dlPFC	NPEPPS	chr17:clu_3042_NA	chr17:45646860-45656756	2.05e-06	0.00412821	31911676 (HsaEX0043508); 31911676 (HsaEX0043508)	HsaEX0043508; HsaEX0043507	NA
dlPFC	OPA1	chr3:clu_43629_NA	chr3:193336725-193349401	0.000535992	0.0778618	17024226 (HsaEX0044739); 17709429 (HsaEX0044739); 18419770 (HsaEX0044739); 28636943 (HsaEX0044739); 17024226 (HsaEX0044744); 17709429 (HsaEX0044744); 28636943 (HsaEX0044744); 17024226 (HsaEX0044745); 17709429 (HsaEX0044745); 28636943 (HsaEX0044745)	HsaEX0044739; HsaINT0118239; HsaEX6060212; HsaINT0118238; HsaINT0118240; HsaEX0044737; HsaEX0044744; HsaEX0044745; HsaEX6060211; HsaEX6060213	HsaEX0044744
dlPFC	PACS2	chr14:clu_1566_NA	chr14:105848383-105848814	4.8e-05	0.0235554	19481529 (HsaEX6073249)	HsaEX6073248; HsaALTD0004546-1/2; HsaINT0119498; HsaALTD0004546-2/2; HsaINT0119497; HsaEX6073246; HsaEX6073250; HsaINT0119496; HsaEX0045188; HsaEX6073245; HsaEX6073247; HsaEX6073249; HsaINT0119499; HsaINT0119500	NA
dlPFC	PFKFB3,RP11-563J2.2	chr10:clu_27920_NA	chr10:6266176-6368509	9.11e-05	0.0309388	16115917 (HsaEX0046719)	HsaINT0123346; HsaINT0123348; HsaEX0046721; HsaEX0046726; HsaEX0046719; HsaEX0046720; HsaEX0046725; HsaINT0123347; HsaEX6087426; HsaEX6087428; HsaEX6087427; HsaINT0123345	NA
dlPFC	PPIP5K2	chr5:clu_14209_NA	chr5:102520445-102526543	5.63e-05	0.024506	32249828 (HsaEX0030036)	HsaEX0030033; HsaEX0030036; HsaEX0030037; HsaEX0030034; HsaEX6099328; HsaEX6099330; HsaEX6099329	HsaEX0030036; HsaEX6099329
Midbrain	PRKAA1	chr5:clu_15946_NA	chr5:40767792-40771821	0.000230543	0.0467791	PMID:_32249828 (HsaEX0050073)	HsaINT0131773; HsaINT0131774; HsaEX0050071; HsaEX0050070; HsaEX0050072; HsaEX0050073; HsaEX6097954; HsaINT0131772; HsaINT0131775	NA
NAc	RBM10	chrX:clu_9168_NA	chrX:47028897-47032527	0.000862339	0.0686955	28586478 (HsaEX0052608)	HsaINT0138291; HsaEX0052607; HsaINT0138290; HsaEX6051478; HsaEX0052604; HsaEX0052606; HsaEX0052608; HsaINT0138285; HsaEX6051477; HsaINT0138292	HsaEX0052608; HsaEX6051477
dlPFC	RBM5	chr3:clu_41771_NA	chr3:50140599-50142510	0.000401456	0.0660205	28586478 (HsaEX0052743); 30916337 (HsaEX0052743)	HsaINT0138621; HsaEX6056144; HsaEX0052744; HsaINT0138619; HsaINT0138620; HsaEX6056145; HsaEX0052738; HsaEX0052745; HsaINT0138599; HsaINT0138618; HsaEX0052743	HsaEX6056145; HsaEX0052743
Midbrain	ROCK1	chr18:clu_14909_NA	chr18:18540167-18546878	0.000167334	0.0398069	PMID: 11283607 (HsaEX6038263)	HsaEX0054231; HsaEX6038264; HsaINT0142099; HsaINT0142100; HsaEX6038261; HsaEX6038263; HsaEX6038262; HsaEX6038265; HsaINT0142098	NA
dlPFC	RYR3	chr15:clu_9910_NA	chr15:34134236-34137063	6.8e-05	0.0263117	12471029 (HsaEX0056077); 16678258 (HsaEX0056077)	HsaEX0056077; HsaINT0144519; HsaINT0144520; HsaEX6073537; HsaEX6073539; HsaEX6073538; HsaEX6073540; HsaINT0144518; HsaINT0144521	NA
NAc	SETD5	chr3:clu_43144_NA	chr3:9476169-9476508	1.64941e-05	0.00617375	31911676 (HsaEX0057502)	HsaALTA0007673-1/2; HsaINT0148336; HsaEX0057497; HsaEX0057502; HsaEX6054242; HsaALTA0007673-2/2; HsaINT0148335; HsaEX0057480; HsaEX0057493; HsaEX0057494; HsaEX0057498; HsaEX0057501; HsaEX6054241; HsaEX6054243; HsaINT0148334; HsaINT0148338; HsaEX0057499; HsaEX0057500; HsaINT0148337	NA
Midbrain	SMOX	chr20:clu_45436_NA	chr20:4163495-4164230	8.66e-05	0.0295557	PMID:_14764092 (HsaEX6077043); PMID: 14764092 (HsaEX0060495); PMID: 15955064 (HsaEX0060495)	HsaINT0155504; HsaEX0060494; HsaINT0155501; HsaEX6077043; HsaEX0060495; HsaINT0155502; HsaINT0155505	NA
dlPFC	SNAP23	chr15:clu_10114_NA	chr15:42807552-42837334	0.0001811	0.0423676	11354632 (HsaEX0060603); 27851958 (HsaEX0060602)	HsaEX0060603; HsaINT0097004; HsaINT0155735; HsaEX0060602; HsaEX6074193; HsaINT0155734; HsaINT0155736; HsaEX6074195; HsaEX6074199; HsaEX6074200; HsaINT0097003; HsaEX6074194; HsaINT0155733	HsaEX0060603; HsaEX0060602; HsaEX6074193; HsaEX6074195; HsaEX6074194
dlPFC	SRPK2	chr7:clu_7547_NA	chr7:105029149-105029691	0.000333997	0.0598175	31911676 (HsaEX0061761)	HsaINT0159070; HsaEX0061759; HsaEX0061760; HsaINT0159077; HsaEX0061753; HsaEX0061761	NA
NAc	UBP1	chr3:clu_43518_NA	chr3:33444396-33450728	0.00164896	0.096687	16115195 (HsaEX0068919); 15988015 (HsaEX0068919); 19338758 (HsaEX0068919)	HsaEX0068919; HsaEX6054923; HsaINT0176684; HsaINT0176686; HsaINT0176685; HsaALTA0009235-1/2; HsaEX6054921; HsaEX6054924; HsaINT0176672; HsaINT0176683; HsaEX6054922; HsaEX6054925; HsaALTA0009235-2/2	HsaEX6054925
NAc	VCAM1	chr1:clu_21925_NA	chr1:101190446-101196754	0.000897171	0.0696226	16585601 (HsaEX0070278)	HsaINT0179995; HsaEX0070278; HsaINT0179994; HsaEX0070277; HsaEX6032386; HsaEX6032388; HsaEX6032387; HsaINT0179993; HsaINT0179996	NA
dlPFC	WNK1	chr12:clu_25273_NA	chr12:971436-987381	0.000516338	0.0771455	23838290 (HsaEX6064454)	HsaEX0071555; HsaALTA0009546-1/2; HsaINT0183087; HsaALTA0009546-2/2; HsaEX0071556; HsaINT0183064; HsaINT0183088; HsaEX0071559; HsaEX0071560; HsaEX6064453; HsaEX6064454; HsaINT0183065; HsaINT0183085; HsaEX6064452; HsaEX6064455; HsaINT0183086	NA
Midbrain	ZNF821	chr16:clu_38287_NA	chr16:71913926-71917114	0.000113002	0.0329817	PMID:_31911676 (HsaEX0074408)	HsaEX0074407; HsaEX0074404; HsaEX0074405; HsaEX0074408; HsaINT0015752	NA

## Sheet: Supplementary File S3
Brain	ensembl_gene_id	hgnc_symbol	chromosome_name	gene_biotype	transcript_start	transcript_end	baseMean	log2FoldChange	lfcSE	stat	pvalue	padj
dlPFC	ENSG00000007866	TEAD3	6	protein_coding	35441374	35464727	21.5056	0.734843	0.230017	3.19473	0.0013996	0.0477969
dlPFC	ENSG00000010319	SEMA3G	3	protein_coding	52467069	52479043	145.801	-0.501063	0.18287	-2.74	0.00614393	0.0996715
dlPFC	ENSG00000011422	PLAUR	19	protein_coding	44150247	44174318	32.2813	0.951435	0.222585	4.27448	1.91586e-05	0.0061569
dlPFC	ENSG00000013364	MVP	16	protein_coding	29831715	29847108	215.166	0.545678	0.155888	3.50045	0.000464465	0.0279038
dlPFC	ENSG00000017483	SLC38A5	X	protein_coding	48316920	48328565	103.911	-0.579465	0.210985	-2.74648	0.00602387	0.0986271
dlPFC	ENSG00000018280	SLC11A1	2	protein_coding	219246752	219260750	53.2974	1.70243	0.413813	4.11401	3.88846e-05	0.00892257
dlPFC	ENSG00000021355	SERPINB1	6	protein_coding	2832566	2842240	142.43	0.711802	0.183819	3.87229	0.000107818	0.0141577
dlPFC	ENSG00000026508	CD44	11	protein_coding	35160417	35253949	170.52	1.24157	0.401011	3.09611	0.00196078	0.0567924
dlPFC	ENSG00000047617	ANO2	12	protein_coding	5641035	5672503	77.0197	0.514953	0.183136	2.81186	0.00492565	0.0889338
dlPFC	ENSG00000054967	RELT	11	protein_coding	73087309	73108517	95.8203	0.533808	0.159624	3.34415	0.000825355	0.0375509
dlPFC	ENSG00000059804	SLC2A3	12	protein_coding	8071826	8088871	1935.72	0.507974	0.122704	4.13984	3.47549e-05	0.00889919
dlPFC	ENSG00000060138	YBX3	12	protein_coding	10851683	10875906	313.828	1.61873	0.329482	4.91296	8.97117e-07	0.00227038
dlPFC	ENSG00000064932	SBNO2	19	protein_coding	1107636	1174282	101.472	1.10715	0.234792	4.71546	2.41169e-06	0.00233885
dlPFC	ENSG00000065911	MTHFD2	2	protein_coding	74425689	74444692	91.5777	0.599938	0.205269	2.9227	0.00347015	0.0741363
dlPFC	ENSG00000067182	TNFRSF1A	12	protein_coding	6437923	6451280	128.219	0.531913	0.169732	3.13384	0.00172533	0.0535553
dlPFC	ENSG00000076555	ACACB	12	protein_coding	109554400	109706031	501.728	-0.511942	0.108595	-4.71426	2.42595e-06	0.00233885
dlPFC	ENSG00000077238	IL4R	16	protein_coding	27324989	27356341	132.727	1.07862	0.300641	3.58772	0.000333586	0.0238649
dlPFC	ENSG00000078401	EDN1	6	protein_coding	12290596	12297427	141.511	1.27349	0.327158	3.8926	9.91773e-05	0.0133863
dlPFC	ENSG00000086544	ITPKC	19	protein_coding	41223008	41246765	186.878	0.719177	0.217134	3.31213	0.000925885	0.0390501
dlPFC	ENSG00000090339	ICAM1	19	protein_coding	10381511	10397291	45.9984	1.34233	0.403314	3.32824	0.00087395	0.0380516
dlPFC	ENSG00000099860	GADD45B	19	protein_coding	2476120	2476636	283.009	1.87058	0.414523	4.51261	6.40338e-06	0.00338141
dlPFC	ENSG00000100300	TSPO	22	protein_coding	43547520	43559248	37.4309	0.621686	0.150959	4.11823	3.81795e-05	0.00892257
dlPFC	ENSG00000101000	PROCR	20	protein_coding	33759876	33765165	17.7498	-0.533354	0.187464	-2.8451	0.0044397	0.084741
dlPFC	ENSG00000101187	SLCO4A1	20	protein_coding	61273872	61303645	152.435	0.868162	0.299171	2.90189	0.00370918	0.077339
dlPFC	ENSG00000101311	FERMT1	20	protein_coding	6055492	6074819	74.451	-0.592996	0.157529	-3.76437	0.00016697	0.0174446
dlPFC	ENSG00000102109	PCSK1N	X	protein_coding	48689504	48694035	218.676	0.616809	0.178491	3.45568	0.000548909	0.0301171
dlPFC	ENSG00000102287	GABRE	X	protein_coding	151121596	151143151	45.122	1.18491	0.30176	3.92664	8.61398e-05	0.0129733
dlPFC	ENSG00000103196	CRISPLD2	16	protein_coding	84853590	84943114	160.033	1.22207	0.304079	4.01891	5.84671e-05	0.0110629
dlPFC	ENSG00000103241	FOXF1	16	protein_coding	86544133	86548076	24.5497	0.970748	0.268688	3.61292	0.000302768	0.0229582
dlPFC	ENSG00000105835	NAMPT	7	protein_coding	105888731	105925638	1410.89	0.590645	0.114254	5.16955	2.34656e-07	0.00176874
dlPFC	ENSG00000110852	CLEC2B	12	protein_coding	10005583	10022735	27.9334	0.625096	0.225679	2.76985	0.00560829	0.0954164
dlPFC	ENSG00000110876	SELPLG	12	protein_coding	109016053	109027735	68.7421	-0.786907	0.238563	-3.29852	0.000971946	0.039976
dlPFC	ENSG00000111404	RERGL	12	protein_coding	18233803	18243127	52.6647	-0.944459	0.329404	-2.86718	0.00414153	0.0819639
dlPFC	ENSG00000112214	FHL5	6	protein_coding	97010460	97058573	80.5319	-0.7475	0.185894	-4.0211	5.79279e-05	0.0110629
dlPFC	ENSG00000113739	STC2	5	protein_coding	172741716	172756506	22.8482	1.36163	0.307427	4.42911	9.46211e-06	0.00416456
dlPFC	ENSG00000114315	HES1	3	protein_coding	193853934	193856521	99.5497	0.516431	0.157871	3.27123	0.00107083	0.0412171
dlPFC	ENSG00000115112	TFCP2L1	2	protein_coding	121974163	122042783	30.6572	-0.933366	0.259118	-3.60209	0.000315667	0.0233248
dlPFC	ENSG00000115594	IL1R1	2	protein_coding	102681004	102781413	131.087	0.906918	0.308155	2.94306	0.00324987	0.0713431
dlPFC	ENSG00000116701	NCF2	1	protein_coding	183524698	183560011	38.6365	0.837777	0.273714	3.06077	0.00220768	0.0601869
dlPFC	ENSG00000116717	GADD45A	1	protein_coding	68150744	68154021	154.101	1.04723	0.238533	4.39031	1.13189e-05	0.00458326
dlPFC	ENSG00000117525	F3	1	protein_coding	94994781	95007356	978.462	0.828266	0.240873	3.4386	0.000584731	0.031049
dlPFC	ENSG00000118503	TNFAIP3	6	protein_coding	138188351	138192441	50.1042	0.803225	0.22199	3.6183	0.000296548	0.0226563
dlPFC	ENSG00000118785	SPP1	4	protein_coding	88896819	88904562	1547.54	0.978469	0.313038	3.12572	0.00177371	0.0542455
dlPFC	ENSG00000120318	ARAP3	5	protein_coding	141032968	141061770	121.867	0.523267	0.173158	3.0219	0.00251191	0.0637837
dlPFC	ENSG00000120889	TNFRSF10B	8	protein_coding	22877646	22885481	117.173	0.583465	0.162305	3.59487	0.00032456	0.0235521
dlPFC	ENSG00000122862	SRGN	10	protein_coding	70847862	70864297	259.755	0.739957	0.231161	3.20105	0.00136927	0.0475509
dlPFC	ENSG00000122877	EGR2	10	protein_coding	64571756	64576115	34.883	-0.912324	0.296649	-3.07543	0.00210199	0.0586101
dlPFC	ENSG00000123374	CDK2	12	protein_coding	56360553	56366568	31.9967	0.952307	0.293414	3.24561	0.001172	0.0440189
dlPFC	ENSG00000123999	INHA	2	protein_coding	220433884	220439775	25.8101	0.518486	0.175264	2.95831	0.00309331	0.0699744
dlPFC	ENSG00000124205	EDN3	20	protein_coding	57875482	57901047	47.8859	-0.54816	0.177937	-3.08064	0.00206558	0.0582448
dlPFC	ENSG00000124529	HIST1H4B	6	protein_coding	26027124	26027480	78.5612	-0.509316	0.124242	-4.09938	4.14265e-05	0.00892257
dlPFC	ENSG00000124762	CDKN1A	6	protein_coding	36644305	36652288	188.874	1.95907	0.423436	4.6266	3.71713e-06	0.00288703
dlPFC	ENSG00000125089	SH3TC1	4	protein_coding	8183799	8214556	67.4668	0.839542	0.225222	3.72763	0.000193293	0.0185469
dlPFC	ENSG00000125148	MT2A	16	protein_coding	56642111	56643409	258.859	0.929538	0.278405	3.3388	0.000841412	0.0380251
dlPFC	ENSG00000125347	IRF1	5	protein_coding	131817301	131826490	124.746	0.587923	0.169019	3.47843	0.000504351	0.0286083
dlPFC	ENSG00000125657	TNFSF9	19	protein_coding	6531010	6535931	26.4435	0.503504	0.180041	2.7966	0.00516429	0.0909864
dlPFC	ENSG00000125733	TRIP10	19	protein_coding	6737936	6751511	48.501	0.900121	0.227738	3.95245	7.73563e-05	0.0128583
dlPFC	ENSG00000125740	FOSB	19	protein_coding	45971253	45978436	50.8718	-0.577951	0.204319	-2.82866	0.00467427	0.0868285
dlPFC	ENSG00000125810	CD93	20	protein_coding	23059986	23066977	124.473	1.46163	0.355564	4.11074	3.94399e-05	0.00892257
dlPFC	ENSG00000127472	PLA2G5	1	protein_coding	20354672	20417683	40.9742	-0.623052	0.142732	-4.36519	1.2701e-05	0.00485392
dlPFC	ENSG00000127507	EMR2	19	protein_coding	14843205	14889349	26.4193	1.02967	0.268588	3.83364	0.000126259	0.015094
dlPFC	ENSG00000128016	ZFP36	19	protein_coding	39897453	39900052	125.098	1.99727	0.417767	4.78081	1.74587e-06	0.00229766
dlPFC	ENSG00000128917	DLL4	15	protein_coding	41221538	41223088	63.2816	0.762245	0.239942	3.17679	0.00148917	0.0497521
dlPFC	ENSG00000130164	LDLR	19	protein_coding	11200038	11242839	347.374	0.65876	0.21067	3.12697	0.00176617	0.0540967
dlPFC	ENSG00000130589	HELZ2	20	protein_coding	62189439	62199427	65.8506	1.20052	0.265866	4.5155	6.31676e-06	0.00338141
dlPFC	ENSG00000130748	TMEM160	19	protein_coding	47549165	47551888	74.9028	0.5995	0.161466	3.71286	0.00020493	0.0190349
dlPFC	ENSG00000131094	C1QL1	17	protein_coding	43037061	43045439	28.9247	0.531704	0.149015	3.56813	0.000359536	0.0243447
dlPFC	ENSG00000132915	PDE6A	5	protein_coding	149237519	149324356	19.8475	-0.507862	0.163518	-3.10585	0.00189733	0.0562171
dlPFC	ENSG00000133048	CHI3L1	1	protein_coding	203148059	203151262	287.847	1.19527	0.413758	2.88883	0.00386684	0.0794801
dlPFC	ENSG00000134531	EMP1	12	protein_coding	13349650	13369708	166.99	1.49062	0.338101	4.4088	1.03947e-05	0.00438439
dlPFC	ENSG00000135063	FAM189A2	9	protein_coding	71944241	72007370	216.129	0.858004	0.265344	3.23356	0.00122259	0.0451145
dlPFC	ENSG00000135245	HILPDA	7	protein_coding	128095903	128097978	285.642	1.87284	0.486115	3.85267	0.000116839	0.0142956
dlPFC	ENSG00000136297	MMD2	7	protein_coding	4945620	4998822	156.358	-0.610049	0.164426	-3.71018	0.000207114	0.0190349
dlPFC	ENSG00000136997	MYC	8	protein_coding	128747680	128752723	39.1821	0.80579	0.217365	3.70708	0.000209661	0.0190349
dlPFC	ENSG00000137193	PIM1	6	protein_coding	37137979	37143202	112.371	0.536427	0.17686	3.03306	0.00242086	0.0625836
dlPFC	ENSG00000137462	TLR2	4	protein_coding	154622652	154626851	101.737	0.966381	0.271453	3.56003	0.000370812	0.0246146
dlPFC	ENSG00000137507	LRRC32	11	protein_coding	76368568	76381791	86.9382	0.890134	0.218568	4.07257	4.64965e-05	0.00965409
dlPFC	ENSG00000137801	THBS1	15	protein_coding	39873280	39874608	418.044	0.623157	0.226095	2.75617	0.00584825	0.0971488
dlPFC	ENSG00000138792	ENPEP	4	protein_coding	111286889	111427414	57.3567	0.516411	0.187423	2.75533	0.00586338	0.0971488
dlPFC	ENSG00000140525	FANCI	15	protein_coding	89787180	89860492	175.201	0.505061	0.167675	3.01213	0.00259419	0.0643507
dlPFC	ENSG00000140839	CLEC18B	16	protein_coding	74442529	74455290	38.2049	-0.520666	0.183041	-2.84453	0.00444767	0.084741
dlPFC	ENSG00000141526	SLC16A3	17	protein_coding	80186273	80195520	69.051	1.00041	0.285379	3.50554	0.000455685	0.0277051
dlPFC	ENSG00000142173	COL6A2	21	protein_coding	47518011	47552763	106.276	0.516307	0.1174	4.39786	1.09325e-05	0.00451712
dlPFC	ENSG00000142178	SIK1	21	protein_coding	44834395	44847008	217.456	0.723451	0.262685	2.75406	0.00588604	0.0973601
dlPFC	ENSG00000142583	SLC2A5	1	protein_coding	9095166	9129775	149.132	0.898927	0.313636	2.86614	0.00415506	0.0819916
dlPFC	ENSG00000142627	EPHA2	1	protein_coding	16450832	16482582	30.9358	0.937744	0.310131	3.0237	0.00249704	0.0635914
dlPFC	ENSG00000142731	PLK4	4	protein_coding	128802016	128820350	57.1017	0.581914	0.158594	3.66921	0.000243301	0.0206104
dlPFC	ENSG00000143226	FCGR2A	1	protein_coding	161475220	161488348	75.0637	0.9063	0.288113	3.14565	0.00165721	0.052589
dlPFC	ENSG00000143333	RGS16	1	protein_coding	182567758	182573543	88.3169	1.31385	0.296615	4.42949	9.44578e-06	0.00416456
dlPFC	ENSG00000144802	NFKBIZ	3	protein_coding	101546835	101570970	147.306	0.533837	0.174849	3.05313	0.00226467	0.0607292
dlPFC	ENSG00000145623	OSMR	5	protein_coding	38845960	38886759	218.428	1.21276	0.301016	4.0289	5.60384e-05	0.0110065
dlPFC	ENSG00000148841	ITPRIP	10	protein_coding	106071894	106098162	51.5959	0.606956	0.203757	2.97882	0.00289357	0.0680826
dlPFC	ENSG00000148926	ADM	11	protein_coding	10326227	10328944	80.7755	2.40537	0.506859	4.74563	2.07859e-06	0.00229766
dlPFC	ENSG00000149573	MPZL2	11	protein_coding	118124118	118134997	26.6577	1.37001	0.331749	4.12966	3.63303e-05	0.00892257
dlPFC	ENSG00000150337	FCGR1A	1	protein_coding	149754227	149762946	71.8773	1.2473	0.360092	3.46384	0.000532521	0.0295955
dlPFC	ENSG00000151929	BAG3	10	protein_coding	121410882	121437331	178.255	1.13494	0.317892	3.57022	0.000356684	0.0243447
dlPFC	ENSG00000152049	KCNE4	2	protein_coding	223916532	223920355	72.9183	1.32599	0.392357	3.37955	0.000726039	0.0352687
dlPFC	ENSG00000152669	CCNO	5	protein_coding	54526980	54529425	32.2708	0.568668	0.198553	2.86406	0.00418253	0.0820101
dlPFC	ENSG00000152939	MARVELD2	5	protein_coding	68710939	68737883	23.9433	-0.523897	0.15238	-3.43809	0.000585831	0.031049
dlPFC	ENSG00000152977	ZIC1	3	protein_coding	147111209	147225773	212.348	0.890469	0.249632	3.56713	0.000360919	0.0243447
dlPFC	ENSG00000153822	KCNJ16	17	protein_coding	68049570	68128334	236.11	-0.519102	0.141625	-3.66534	0.000247015	0.0208378
dlPFC	ENSG00000154734	ADAMTS1	21	protein_coding	28208066	28217728	603.374	0.839084	0.273941	3.06301	0.0021912	0.0601574
dlPFC	ENSG00000156049	GNA14	9	protein_coding	80037995	80263223	144.971	0.514062	0.166133	3.09427	0.00197298	0.0570642
dlPFC	ENSG00000157335	CLEC18C	16	protein_coding	70207225	70216359	31.8947	-0.54707	0.170438	-3.20978	0.00132834	0.046853
dlPFC	ENSG00000157399	ARSE	X	protein_coding	2852857	2882311	23.068	-0.552594	0.15886	-3.4785	0.000504221	0.0286083
dlPFC	ENSG00000158859	ADAMTS4	1	protein_coding	161154098	161168846	293.002	0.885538	0.214045	4.13715	3.51642e-05	0.00889919
dlPFC	ENSG00000159216	RUNX1	21	protein_coding	36160098	36260987	60.3885	0.828088	0.21106	3.92347	8.72828e-05	0.0129733
dlPFC	ENSG00000159289	GOLGA6A	15	protein_coding	74362198	74374891	18.979	1.25553	0.222258	5.64897	1.61413e-08	0.000326797
dlPFC	ENSG00000159399	HK2	2	protein_coding	75061108	75120486	101.741	0.791552	0.256448	3.08659	0.00202465	0.0577489
dlPFC	ENSG00000159860	FAM115D	7	pseudogene	143497825	143515066	68.4002	0.817311	0.240307	3.40111	0.000671138	0.0337168
dlPFC	ENSG00000162391	FAM151A	1	protein_coding	55074855	55089229	21.418	-0.586871	0.196198	-2.99122	0.00277867	0.0668078
dlPFC	ENSG00000163145	C1QTNF7	4	protein_coding	15341442	15443986	75.2314	0.620733	0.157557	3.93973	8.15719e-05	0.0129478
dlPFC	ENSG00000163492	CCDC141	2	protein_coding	179694996	179701864	100.33	-0.560212	0.154723	-3.62074	0.00029376	0.0226563
dlPFC	ENSG00000163565	IFI16	1	protein_coding	158969758	158984719	250.905	0.616588	0.164337	3.75198	0.000175442	0.0178492
dlPFC	ENSG00000163638	ADAMTS9	3	protein_coding	64501333	64508187	485.27	1.72495	0.475292	3.62924	0.000284253	0.022393
dlPFC	ENSG00000163659	TIPARP	3	protein_coding	156391024	156422928	543.376	0.780141	0.233176	3.34572	0.000820679	0.0375509
dlPFC	ENSG00000163909	HEYL	1	protein_coding	40089825	40105617	29.3373	0.626248	0.203654	3.07506	0.00210459	0.0586101
dlPFC	ENSG00000164142	FAM160A1	4	protein_coding	152330368	152487410	69.4151	-0.579693	0.126375	-4.58709	4.49473e-06	0.0029355
dlPFC	ENSG00000164645	C7orf62	7	protein_coding	88423420	88425035	31.6141	-0.594356	0.163097	-3.64418	0.000268246	0.0218988
dlPFC	ENSG00000164867	NOS3	7	protein_coding	150688083	150711676	47.8062	0.835597	0.222493	3.75561	0.000172921	0.0176816
dlPFC	ENSG00000165030	NFIL3	9	protein_coding	94171327	94186144	201.336	0.697872	0.177819	3.92463	8.68629e-05	0.0129733
dlPFC	ENSG00000165409	TSHR	14	protein_coding	81421333	81422281	59.1147	-0.69791	0.176678	-3.95019	7.80908e-05	0.0128583
dlPFC	ENSG00000165507	C10orf10	10	protein_coding	45466429	45474238	423.348	1.48133	0.395564	3.74484	0.000180506	0.0180917
dlPFC	ENSG00000166289	PLEKHF1	19	protein_coding	30155963	30166364	22.1355	0.681916	0.203538	3.35032	0.000807192	0.0373968
dlPFC	ENSG00000167470	MIDN	19	protein_coding	1248552	1251900	113.669	0.50466	0.180488	2.79608	0.00517263	0.0909864
dlPFC	ENSG00000167772	ANGPTL4	19	protein_coding	8428173	8429493	199.588	1.55832	0.486677	3.20197	0.00136492	0.0474813
dlPFC	ENSG00000168404	MLKL	16	protein_coding	74705753	74734688	40.3041	1.14353	0.319126	3.58331	0.000339264	0.0240166
dlPFC	ENSG00000168884	TNIP2	4	protein_coding	2743375	2758058	64.7796	0.641662	0.156772	4.09297	4.2589e-05	0.00907639
dlPFC	ENSG00000168994	PXDC1	6	protein_coding	3722848	3751766	90.0247	0.6741	0.204474	3.29676	0.000978078	0.039976
dlPFC	ENSG00000169242	EFNA1	1	protein_coding	155099936	155107333	102.169	0.847684	0.241441	3.51093	0.000446542	0.0273133
dlPFC	ENSG00000169908	TM4SF1	3	protein_coding	149086809	149095652	197.851	1.00049	0.240417	4.16147	3.1621e-05	0.00876916
dlPFC	ENSG00000170289	CNGB3	8	protein_coding	87566205	87591434	33.1393	0.634135	0.221364	2.86466	0.00417451	0.0820101
dlPFC	ENSG00000170379	FAM115C	7	protein_coding	143318043	143422176	166.159	0.831299	0.25675	3.23778	0.00120466	0.0447846
dlPFC	ENSG00000170458	CD14	5	protein_coding	140011313	140013286	91.7375	1.24791	0.320571	3.89277	9.91072e-05	0.0133863
dlPFC	ENSG00000170848	PSG6	19	protein_coding	43406231	43422010	45.4837	0.744381	0.199146	3.73786	0.000185592	0.0182403
dlPFC	ENSG00000170961	HAS2	8	protein_coding	122624356	122653630	17.397	0.667976	0.225284	2.96504	0.00302645	0.0694063
dlPFC	ENSG00000171051	FPR1	19	protein_coding	52248425	52255146	55.1054	2.03119	0.424229	4.78795	1.68494e-06	0.00229766
dlPFC	ENSG00000171223	JUNB	19	protein_coding	12902310	12904124	219.716	0.746668	0.23345	3.19841	0.00138186	0.0477831
dlPFC	ENSG00000171621	SPSB1	1	protein_coding	9352939	9429591	84.0161	0.614323	0.170298	3.60733	0.000309363	0.0231977
dlPFC	ENSG00000173218	VANGL1	1	protein_coding	116184612	116240845	59.0807	-0.503138	0.160051	-3.1436	0.00166882	0.0526583
dlPFC	ENSG00000173281	PPP1R3B	8	protein_coding	8993765	9008206	58.4008	0.706347	0.200243	3.52744	0.000419591	0.026547
dlPFC	ENSG00000173530	TNFRSF10D	8	protein_coding	22993101	23021543	39.2178	1.26196	0.340373	3.70758	0.000209246	0.0190349
dlPFC	ENSG00000174175	SELP	1	protein_coding	169558087	169588457	40.6849	0.725087	0.217677	3.33103	0.000865265	0.0380305
dlPFC	ENSG00000175602	CCDC85B	11	protein_coding	65657875	65659105	187.656	0.802696	0.219193	3.66205	0.000250208	0.0210048
dlPFC	ENSG00000176014	TUBB6	18	protein_coding	12307668	12325180	99.255	0.697471	0.169899	4.10521	4.03946e-05	0.00892257
dlPFC	ENSG00000177606	JUN	1	protein_coding	59246465	59249785	687.203	0.530925	0.137683	3.85612	0.000115199	0.0142215
dlPFC	ENSG00000178081	ULK4P3	15	pseudogene	30395923	30423430	23.1191	0.501541	0.168785	2.97147	0.00296376	0.0688463
dlPFC	ENSG00000178726	THBD	20	protein_coding	23026270	23030378	28.8718	1.17791	0.30367	3.87891	0.000104927	0.013976
dlPFC	ENSG00000178860	MSC	8	protein_coding	72753784	72756703	18.3358	-0.639235	0.204883	-3.12	0.00180848	0.0546811
dlPFC	ENSG00000178878	APOLD1	12	protein_coding	12878851	12967133	1241.23	1.12451	0.408387	2.75354	0.00589552	0.0974374
dlPFC	ENSG00000179144	GIMAP7	7	protein_coding	150211918	150218161	41.7629	-0.640856	0.203859	-3.14362	0.00166873	0.0526583
dlPFC	ENSG00000179403	VWA1	1	protein_coding	1370241	1372839	173.645	0.632215	0.151172	4.18209	2.88844e-05	0.00823652
dlPFC	ENSG00000179776	CDH5	16	protein_coding	66400533	66438686	171.441	0.62889	0.176917	3.55471	0.000378399	0.0248736
dlPFC	ENSG00000179862	CITED4	1	protein_coding	41326729	41328018	16.7561	0.704861	0.230821	3.05371	0.00226032	0.0607292
dlPFC	ENSG00000181826	RELL1	4	protein_coding	37592422	37687998	129.789	0.810771	0.167209	4.84886	1.24175e-06	0.0022855
dlPFC	ENSG00000181856	SLC2A4	17	protein_coding	7184986	7191576	21.0475	0.632712	0.208205	3.03889	0.00237451	0.0620462
dlPFC	ENSG00000182118	FAM89A	1	protein_coding	231154704	231175992	54.3529	0.501468	0.177342	2.82769	0.00468851	0.0869752
dlPFC	ENSG00000182308	DCAF4L1	4	protein_coding	41983713	41988476	26.8594	0.705401	0.232167	3.03833	0.0023789	0.0620661
dlPFC	ENSG00000182541	LIMK2	22	protein_coding	31608225	31655032	290.008	0.515403	0.155085	3.32336	0.000889413	0.0383946
dlPFC	ENSG00000182718	ANXA2	15	protein_coding	60639333	60690185	160.835	0.650429	0.212361	3.06285	0.00219243	0.0601574
dlPFC	ENSG00000182871	COL18A1	21	protein_coding	46825052	46933634	162.713	0.521913	0.145131	3.59615	0.000322965	0.0235206
dlPFC	ENSG00000183134	PTGDR2	11	protein_coding	60618413	60623444	30.2768	-0.85682	0.243854	-3.51365	0.000441992	0.027307
dlPFC	ENSG00000183549	ACSM5	16	protein_coding	20420856	20431117	32.8288	-0.66904	0.208222	-3.21311	0.00131305	0.0465568
dlPFC	ENSG00000184113	CLDN5	22	protein_coding	19510547	19515068	151.072	0.59716	0.162583	3.67296	0.000239753	0.0204687
dlPFC	ENSG00000184557	SOCS3	17	protein_coding	76352864	76356158	144.145	3.21115	0.623663	5.14885	2.62088e-07	0.00176874
dlPFC	ENSG00000184612	RPL7P26	6	pseudogene	17531130	17531883	18.1471	-0.528095	0.181556	-2.90872	0.00362915	0.0762197
dlPFC	ENSG00000184956	MUC6	11	protein_coding	1012821	1036706	25.9312	-0.623393	0.227294	-2.74267	0.0060942	0.0993579
dlPFC	ENSG00000184986	TMEM121	14	protein_coding	105992940	105996539	40.6427	0.633862	0.185201	3.42257	0.000620331	0.0323691
dlPFC	ENSG00000185022	MAFF	22	protein_coding	38597889	38612518	81.3355	1.40767	0.334462	4.20877	2.56766e-05	0.00764483
dlPFC	ENSG00000185303	SFTPA2	10	protein_coding	81315608	81320151	20.5162	0.92685	0.217172	4.26781	1.97404e-05	0.0062108
dlPFC	ENSG00000187193	MT1X	16	protein_coding	56716336	56718108	173.478	1.55543	0.400252	3.88613	0.000101856	0.0136568
dlPFC	ENSG00000187479	C11orf96	11	protein_coding	43964055	43965888	64.4642	1.38858	0.328974	4.22093	2.43293e-05	0.00735181
dlPFC	ENSG00000187498	COL4A1	13	protein_coding	110801318	110959496	384.966	0.832264	0.236882	3.51341	0.000442394	0.027307
dlPFC	ENSG00000188290	HES4	1	protein_coding	934342	935552	30.1835	0.661986	0.181226	3.65283	0.000259368	0.0213462
dlPFC	ENSG00000188313	PLSCR1	3	protein_coding	146232967	146262651	266.089	0.758591	0.201645	3.76202	0.000168546	0.0174446
dlPFC	ENSG00000188404	SELL	1	protein_coding	169659808	169680839	28.7914	0.709753	0.230472	3.07957	0.00207302	0.0582923
dlPFC	ENSG00000188483	IER5L	9	protein_coding	131937835	131940540	36.2114	0.595401	0.15073	3.9501	7.81176e-05	0.0128583
dlPFC	ENSG00000188992	LIPI	21	protein_coding	15481134	15579270	21.5774	0.887188	0.244092	3.63464	0.000278364	0.0222757
dlPFC	ENSG00000189350	FAM179A	2	protein_coding	29179477	29256386	83.6485	-1.01674	0.320654	-3.17082	0.00152008	0.0503692
dlPFC	ENSG00000196081	ZNF724P	19	protein_coding	23404401	23433162	87.4024	0.565022	0.136456	4.14068	3.46272e-05	0.00889919
dlPFC	ENSG00000196843	ARID5A	2	protein_coding	97202480	97216022	106.84	0.70155	0.253819	2.76398	0.00571008	0.0961783
dlPFC	ENSG00000196954	CASP4	11	protein_coding	104813593	104819621	59.3515	0.851001	0.225575	3.77258	0.000161568	0.0171262
dlPFC	ENSG00000197093	GAL3ST4	7	protein_coding	99756867	99764907	31.9848	-0.544267	0.19111	-2.84792	0.00440058	0.0843695
dlPFC	ENSG00000197568	HHLA3	1	protein_coding	70820488	70833594	30.647	-0.503293	0.140074	-3.59306	0.00032682	0.0236314
dlPFC	ENSG00000198019	FCGR1B	1	protein_coding	120926979	120935937	43.3577	1.28958	0.355442	3.62811	0.000285501	0.0224041
dlPFC	ENSG00000198734	F5	1	protein_coding	169483404	169484983	204.53	0.518933	0.111121	4.67	3.01207e-06	0.00277192
dlPFC	ENSG00000198805	PNP	14	protein_coding	20937113	20942730	78.7159	0.810278	0.217724	3.72159	0.000197974	0.0187943
dlPFC	ENSG00000198842	DUSP27	1	protein_coding	167063282	167098366	23.7169	-0.639063	0.194087	-3.29267	0.000992415	0.0401047
dlPFC	ENSG00000203710	CR1	1	protein_coding	207669492	207732829	50.1225	1.36765	0.414037	3.3032	0.000955894	0.039821
dlPFC	ENSG00000204909	SPINK9	5	protein_coding	147700766	147719285	26.9066	-0.615297	0.162929	-3.77647	0.000159068	0.0171173
dlPFC	ENSG00000205364	MT1M	16	protein_coding	56666145	56667898	169.184	1.18532	0.358329	3.3079	0.000939994	0.0393205
dlPFC	ENSG00000205669	ACOT6	14	protein_coding	74077649	74086425	24.337	-0.570726	0.163599	-3.48857	0.000485609	0.0284975
dlPFC	ENSG00000213347	MXD3	5	protein_coding	176728462	176738871	21.3853	0.54679	0.194563	2.81035	0.00494878	0.0889813
dlPFC	ENSG00000213533	TMEM110	3	protein_coding	52870235	52874623	25.3925	-0.516895	0.142614	-3.62443	0.000289596	0.0226377
dlPFC	ENSG00000214552	COPS8P2	3	pseudogene	68194154	68194780	40.4829	-0.50795	0.142119	-3.57412	0.000351402	0.0243447
dlPFC	ENSG00000221819	C16orf3	16	protein_coding	90095316	90096309	27.1331	-0.649555	0.192645	-3.37178	0.000746843	0.0355778
dlPFC	ENSG00000221826	PSG3	19	protein_coding	43225790	43243524	45.7593	0.577514	0.136344	4.23571	2.27827e-05	0.00698877
dlPFC	ENSG00000221869	CEBPD	8	protein_coding	48649471	48651648	91.4793	1.11466	0.3058	3.64507	0.000267321	0.0218988
dlPFC	ENSG00000221878	PSG7	19	polymorphic_pseudogene	43428286	43431729	42.1691	0.647754	0.157322	4.11738	3.83201e-05	0.00892257
dlPFC	ENSG00000221963	APOL6	22	protein_coding	36044442	36064456	285.279	0.72382	0.217276	3.33133	0.000864316	0.0380305
dlPFC	ENSG00000223403	MEG9	14	lincRNA	101536248	101539271	43.8495	-0.537287	0.148395	-3.62064	0.000293873	0.0226563
dlPFC	ENSG00000224081	LINC01057	1	lincRNA	95104017	95285652	23.3703	0.770437	0.238276	3.23338	0.00122334	0.0451145
dlPFC	ENSG00000224117	PTPN2P2	13	pseudogene	31127807	31128830	28.5929	-0.503544	0.152056	-3.31157	0.000927745	0.0390501
dlPFC	ENSG00000225192	ZNF33BP1	10	pseudogene	38083204	38085037	74.7154	0.635241	0.166345	3.81882	0.000134094	0.0156027
dlPFC	ENSG00000226627	SHANK2-AS1	11	antisense	70477199	70481595	41.4755	-0.598342	0.18224	-3.28326	0.00102614	0.0407357
dlPFC	ENSG00000226746	SMCR5	17	antisense	17680000	17682843	21.2327	-0.825541	0.164092	-5.03095	4.88045e-07	0.00184573
dlPFC	ENSG00000227456	LINC00310	21	lincRNA	35552978	35555546	22.4411	-0.579193	0.164512	-3.52067	0.000430463	0.0270657
dlPFC	ENSG00000227835	CARM1P1	9	pseudogene	2907073	3053408	49.9344	0.565213	0.171981	3.28648	0.00101447	0.0405212
dlPFC	ENSG00000228960	OR2A9P	7	pseudogene	143991573	143998027	37.2851	-0.602751	0.159128	-3.78783	0.000151967	0.0167213
dlPFC	ENSG00000229153	EPHA1-AS1	7	antisense	143104906	143220542	31.9084	0.837148	0.22555	3.71159	0.000205964	0.0190349
dlPFC	ENSG00000229644	NAMPTL	10	protein_coding	36810649	36813162	241.866	0.622892	0.124541	5.00149	5.68896e-07	0.00184573
dlPFC	ENSG00000230448	LINC00276	2	lincRNA	13850656	14541087	16.449	-0.543614	0.181582	-2.99376	0.00275564	0.0664967
dlPFC	ENSG00000230793	SMARCE1P5	13	pseudogene	45168994	45170218	32.5474	-0.501045	0.129531	-3.86815	0.000109666	0.0141577
dlPFC	ENSG00000231924	PSG1	19	protein_coding	43370616	43383850	56.8021	0.669246	0.16119	4.1519	3.29729e-05	0.00889919
dlPFC	ENSG00000233670	PIRT	17	protein_coding	10725792	10741762	32.334	1.06941	0.345983	3.09094	0.00199526	0.0573807
dlPFC	ENSG00000234197	ETV5-AS1	3	antisense	185796959	185798736	29.9949	-0.843966	0.270333	-3.12195	0.0017966	0.0546155
dlPFC	ENSG00000235750	KIAA0040	1	protein_coding	175126123	175161929	64.9433	1.57379	0.323309	4.86775	1.12873e-06	0.00228524
dlPFC	ENSG00000236017	ASMTL-AS1	X	antisense	1520662	1522386	29.5306	-0.545022	0.189229	-2.88022	0.00397401	0.0803774
dlPFC	ENSG00000236264	RPL26P30	11	pseudogene	2356362	2357006	19.9862	0.529409	0.171898	3.07978	0.0020715	0.0582923
dlPFC	ENSG00000236411	NDUFAF4P3	3	pseudogene	37831412	37831936	22.4179	-0.533521	0.188532	-2.82987	0.00465674	0.0868285
dlPFC	ENSG00000238250	ST6GAL2-IT1	2	sense_intronic	107439379	107441487	20.8409	-0.575388	0.184175	-3.12414	0.00178323	0.0543723
dlPFC	ENSG00000241158	ADAMTS9-AS1	3	antisense	64547014	64549001	49.1605	1.28291	0.38108	3.3665	0.000761275	0.0359272
dlPFC	ENSG00000242159	ABCF2P1	3	pseudogene	88366306	88368172	20.9632	1.11948	0.26017	4.30286	1.68605e-05	0.00597219
dlPFC	ENSG00000242221	PSG2	19	protein_coding	43568363	43586820	17.396	0.718378	0.234349	3.06542	0.00217363	0.0599556
dlPFC	ENSG00000242229	RPS3AP14	3	pseudogene	125513949	125514728	29.794	-0.506409	0.167832	-3.01736	0.00254986	0.0642077
dlPFC	ENSG00000253193	FCGR1C	1	pseudogene	149369328	149370551	48.6776	1.23748	0.331755	3.73011	0.000191399	0.0185371
dlPFC	ENSG00000258667	HIF1A-AS2	14	lincRNA	62182276	62217815	34.9941	0.607459	0.221064	2.74789	0.00599807	0.0984091
dlPFC	ENSG00000260128	ULK4P2	15	pseudogene	30864941	30876769	25.9732	0.520931	0.16973	3.06917	0.00214656	0.0595332
dlPFC	ENSG00000260727	SLC7A5P1	16	pseudogene	29624425	29624961	26.5036	0.670325	0.241629	2.77419	0.0055339	0.0947077
dlPFC	ENSG00000262814	MRPL12	17	protein_coding	79670387	79674556	18.8914	0.690925	0.243062	2.84259	0.0044749	0.0850693
dlPFC	ENSG00000263426	RN7SL471P	6	misc_RNA	28945252	28945547	1546.25	0.557269	0.173167	3.2181	0.00129041	0.0463221
dlPFC	ENSG00000267493	CIRBP-AS1	19	antisense	1268165	1270240	18.3994	-0.614419	0.182505	-3.36658	0.000761065	0.0359272
dlPFC	ENSG00000268658	LINC00664	19	lincRNA	21666176	21682100	31.0326	0.89579	0.288453	3.1055	0.0018996	0.0562171
dlPFC	ENSG00000269699	ZIM2	19	protein_coding	57285920	57352075	47.5189	0.854614	0.221882	3.85166	0.000117319	0.0142956
dlPFC	ENSG00000269959	SPACA6P-AS	19	lincRNA	52188616	52196709	20.6068	-0.628705	0.209894	-2.99535	0.00274134	0.0663096
dlPFC	ENSG00000270066	SCARNA2	1	lincRNA	109642815	109643241	1572.99	0.544231	0.14216	3.82829	0.000129035	0.0152774
dlPFC	ENSG00000271321	CTAGE6	7	protein_coding	143452182	143454789	37.0224	0.801996	0.243462	3.29413	0.000987257	0.039976
NAc	ENSG00000002330	BAD	11	protein_coding	64037302	64052111	125.498	-0.867181	0.127122	-6.82164	9.0005e-12	2.10032e-08
NAc	ENSG00000004777	ARHGAP33	19	protein_coding	36265434	36269451	288.886	-0.572841	0.221554	-2.58556	0.00972214	0.0836479
NAc	ENSG00000005059	CCDC109B	4	protein_coding	110481361	110609874	62.099	0.50192	0.154998	3.23824	0.0012027	0.0232162
NAc	ENSG00000005206	SPPL2B	19	processed_transcript	2328614	2338525	326.971	-0.54379	0.127644	-4.26022	2.04226e-05	0.00158588
NAc	ENSG00000006015	C19orf60	19	protein_coding	18699495	18703144	146.62	-0.586587	0.0964706	-6.08048	1.19826e-09	1.32452e-06
NAc	ENSG00000006118	TMEM132A	11	protein_coding	60691935	60694103	705.104	-0.538579	0.168901	-3.18872	0.00142903	0.0257464
NAc	ENSG00000007264	MATK	19	protein_coding	3777971	3786411	198.905	-0.606482	0.109623	-5.53243	3.15828e-08	1.50751e-05
NAc	ENSG00000007376	RPUSD1	16	protein_coding	834974	837981	81.153	-0.827259	0.115877	-7.13912	9.39322e-13	3.28794e-09
NAc	ENSG00000007516	BAIAP3	16	protein_coding	1383602	1398795	1319.3	-0.690337	0.241479	-2.85878	0.00425272	0.0511589
NAc	ENSG00000007541	PIGQ	16	protein_coding	616995	624519	299.93	-0.570893	0.137284	-4.15848	3.20369e-05	0.00207666
NAc	ENSG00000007908	SELE	1	protein_coding	169691782	169702800	79.4825	1.79481	0.548541	3.27198	0.00106798	0.0214527
NAc	ENSG00000008710	PKD1	16	protein_coding	2138711	2185899	2175.03	-0.756628	0.188687	-4.00996	6.07279e-05	0.00327868
NAc	ENSG00000010278	CD9	12	protein_coding	6308881	6347425	583.337	0.62043	0.218095	2.84477	0.00444436	0.0526158
NAc	ENSG00000010319	SEMA3G	3	protein_coding	52467069	52479043	169.7	-0.557393	0.197781	-2.81824	0.0048288	0.0552065
NAc	ENSG00000011422	PLAUR	19	protein_coding	44150247	44174318	43.4651	0.548524	0.217824	2.51819	0.0117958	0.0937184
NAc	ENSG00000011451	WIZ	19	protein_coding	15532334	15544101	272.374	-0.626709	0.184279	-3.40088	0.000671703	0.0159763
NAc	ENSG00000012779	ALOX5	10	protein_coding	45869675	45941561	77.868	0.539451	0.155173	3.47645	0.000508092	0.0134077
NAc	ENSG00000014164	ZC3H3	8	protein_coding	144519825	144623623	97.9705	-0.519079	0.175181	-2.9631	0.00304562	0.0416161
NAc	ENSG00000017483	SLC38A5	X	protein_coding	48316920	48328565	99.6213	-0.653069	0.191477	-3.41069	0.000647993	0.015607
NAc	ENSG00000018280	SLC11A1	2	protein_coding	219246752	219260750	100.64	2.15065	0.462413	4.65093	3.30434e-06	0.000423158
NAc	ENSG00000020181	GPR124	8	protein_coding	37641709	37687511	79.875	-0.512893	0.146302	-3.50571	0.000455383	0.0124471
NAc	ENSG00000021355	SERPINB1	6	protein_coding	2832566	2842240	209.801	0.622609	0.187959	3.31247	0.000924758	0.0195314
NAc	ENSG00000024422	EHD2	19	protein_coding	48216600	48246391	60.5564	-0.595766	0.238541	-2.49754	0.0125057	0.0973117
NAc	ENSG00000026559	KCNG1	20	protein_coding	49620193	49639666	79.2671	-0.574548	0.223443	-2.57134	0.0101307	0.0854748
NAc	ENSG00000028137	TNFRSF1B	1	protein_coding	12227060	12269285	132.297	0.593583	0.179592	3.30517	0.000949195	0.0198161
NAc	ENSG00000032444	PNPLA6	19	protein_coding	7598890	7626650	559.063	-0.513512	0.148982	-3.44681	0.000567256	0.0143536
NAc	ENSG00000035499	DEPDC1B	5	protein_coding	59892739	59995988	16.0695	0.600709	0.218737	2.74626	0.00602781	0.0630145
NAc	ENSG00000038945	MSR1	8	protein_coding	15966940	16050224	86.3741	0.94437	0.261438	3.61222	0.000303589	0.00944589
NAc	ENSG00000040608	RTN4R	22	protein_coding	20228938	20255212	31.5226	-1.19976	0.319161	-3.75912	0.000170512	0.00640664
NAc	ENSG00000042980	ADAM28	8	protein_coding	24151553	24216531	298.071	0.585965	0.215475	2.71941	0.00653983	0.0663562
NAc	ENSG00000043355	ZIC2	13	protein_coding	100634026	100639018	33.3842	-0.779179	0.219966	-3.54227	0.000396698	0.0112587
NAc	ENSG00000049283	EPN3	17	protein_coding	48609904	48621111	18.745	-0.641025	0.218469	-2.93417	0.00334438	0.0441645
NAc	ENSG00000057657	PRDM1	6	protein_coding	106534195	106555383	63.6607	0.654319	0.25047	2.61236	0.0089919	0.0798398
NAc	ENSG00000058453	CROCC	1	protein_coding	17066768	17267929	336.829	-0.560598	0.182925	-3.06463	0.00217937	0.0336328
NAc	ENSG00000059804	SLC2A3	12	protein_coding	8071826	8088871	1593.47	0.598443	0.162755	3.67694	0.000236044	0.00810068
NAc	ENSG00000060138	YBX3	12	protein_coding	10851683	10875906	444.768	1.60197	0.343992	4.657	3.20845e-06	0.000417749
NAc	ENSG00000063169	GLTSCR1	19	protein_coding	48111453	48206479	50.6798	-0.682409	0.238584	-2.86024	0.00423318	0.0510227
NAc	ENSG00000063176	SPHK2	19	protein_coding	49122548	49133662	146.072	-0.696015	0.190465	-3.6543	0.000257888	0.00858345
NAc	ENSG00000063245	EPN1	19	protein_coding	56186592	56207132	443.423	-0.705552	0.163291	-4.32082	1.55453e-05	0.00136536
NAc	ENSG00000064270	ATP2C2	16	protein_coding	84402133	84497784	82.0096	-0.611485	0.168776	-3.62307	0.000291132	0.00919452
NAc	ENSG00000064687	ABCA7	19	protein_coding	1040102	1065568	111.938	-0.667874	0.235946	-2.83062	0.0046458	0.0540498
NAc	ENSG00000065054	SLC9A3R2	16	protein_coding	2075357	2086390	179.845	-0.569112	0.132651	-4.29029	1.78442e-05	0.00148716
NAc	ENSG00000065268	WDR18	19	protein_coding	983174	990292	105.716	-0.519816	0.122972	-4.22712	2.36697e-05	0.00172608
NAc	ENSG00000065911	MTHFD2	2	protein_coding	74425689	74444692	142.241	0.982799	0.323457	3.03842	0.00237825	0.0354996
NAc	ENSG00000066735	KIF26A	14	protein_coding	104605060	104646127	48.4979	-0.977191	0.215969	-4.52468	6.04863e-06	0.000679323
NAc	ENSG00000068078	FGFR3	4	protein_coding	1795034	1810592	2198.6	-0.542363	0.115358	-4.70155	2.58191e-06	0.000359108
NAc	ENSG00000071655	MBD3	19	protein_coding	1576639	1585529	276.563	-0.649261	0.11815	-5.49524	3.90173e-08	1.74349e-05
NAc	ENSG00000071991	CDH19	18	protein_coding	64168320	64271371	359.963	0.838458	0.262022	3.19995	0.00137451	0.02511
NAc	ENSG00000072163	LIMS2	2	protein_coding	128395956	128399706	210.643	-0.536082	0.143971	-3.72355	0.000196441	0.00702836
NAc	ENSG00000072195	SPEG	2	protein_coding	220299568	220358354	562.494	-0.52612	0.180161	-2.92027	0.00349725	0.0454061
NAc	ENSG00000073150	PANX2	22	protein_coding	50609160	50618721	82.8868	-0.772559	0.241121	-3.20404	0.00135514	0.0249693
NAc	ENSG00000074181	NOTCH3	19	protein_coding	15270444	15311792	237.036	-0.565464	0.162979	-3.46954	0.000521343	0.0135622
NAc	ENSG00000074370	ATP2A3	17	protein_coding	3827169	3867713	30.7426	-0.500838	0.187176	-2.67576	0.00745596	0.0720948
NAc	ENSG00000074855	ANO8	19	protein_coding	17434032	17445546	223.08	-0.607513	0.160947	-3.77461	0.000160258	0.00615699
NAc	ENSG00000075240	GRAMD4	22	protein_coding	46971909	47033833	437.048	-0.501075	0.099153	-5.05355	4.33677e-07	9.79364e-05
NAc	ENSG00000076555	ACACB	12	protein_coding	109554400	109706031	655.915	-0.55636	0.167795	-3.31571	0.0009141	0.0194311
NAc	ENSG00000076826	CAMSAP3	19	protein_coding	7660788	7682981	105.904	-0.688636	0.209697	-3.28395	0.00102362	0.0208919
NAc	ENSG00000077238	IL4R	16	protein_coding	27324989	27356341	184.186	0.958874	0.296253	3.23667	0.00120932	0.0232797
NAc	ENSG00000078401	EDN1	6	protein_coding	12290596	12297427	148.494	1.14202	0.292045	3.91043	9.21331e-05	0.0043067
NAc	ENSG00000079313	REXO1	19	protein_coding	1815248	1848452	279.548	-0.621792	0.177786	-3.49743	0.00046977	0.0127469
NAc	ENSG00000080573	COL5A3	19	protein_coding	10070237	10121147	418.13	-0.722766	0.205378	-3.5192	0.000432853	0.0119773
NAc	ENSG00000081041	CXCL2	4	protein_coding	74962752	74965010	32.4936	1.05107	0.377552	2.7839	0.005371	0.0591248
NAc	ENSG00000086544	ITPKC	19	protein_coding	41223008	41246765	213.498	0.828853	0.281966	2.93954	0.00328695	0.0438302
NAc	ENSG00000087085	ACHE	7	protein_coding	100487615	100493507	440.26	-0.534656	0.1902	-2.81102	0.0049384	0.0560645
NAc	ENSG00000090006	LTBP4	19	protein_coding	41098789	41111059	225.182	-0.57608	0.213687	-2.69591	0.0070197	0.0693778
NAc	ENSG00000090104	RGS1	1	protein_coding	192544857	192549161	202.342	1.32257	0.466402	2.83568	0.00457283	0.053563
NAc	ENSG00000090339	ICAM1	19	protein_coding	10381511	10397291	83.6936	1.05212	0.307428	3.42234	0.000620852	0.0152757
NAc	ENSG00000090382	LYZ	12	protein_coding	69742121	69748014	32.8537	0.981705	0.314344	3.12303	0.00179002	0.0297235
NAc	ENSG00000092758	COL9A3	20	protein_coding	61447596	61456382	234.179	-0.526692	0.190998	-2.75758	0.00582301	0.0618425
NAc	ENSG00000099364	FBXL19	16	protein_coding	30934376	30937252	320.498	-0.627023	0.10642	-5.89196	3.8164e-09	3.48487e-06
NAc	ENSG00000099624	ATP5D	19	protein_coding	1241749	1244824	148.44	-0.690847	0.138723	-4.98005	6.35669e-07	0.000127146
NAc	ENSG00000099625	C19orf26	19	protein_coding	1228286	1238026	156.928	-0.970899	0.180776	-5.37074	7.84146e-08	3.01528e-05
NAc	ENSG00000099814	CEP170B	14	protein_coding	105331617	105363079	921.322	-0.680184	0.174903	-3.88893	0.000100686	0.0045671
NAc	ENSG00000099849	RASSF7	11	protein_coding	560404	563993	75.1678	-0.646599	0.16394	-3.94412	8.00946e-05	0.00402427
NAc	ENSG00000099860	GADD45B	19	protein_coding	2476120	2476636	368.257	1.55583	0.465433	3.34277	0.00082948	0.0183183
NAc	ENSG00000099864	PALM	19	protein_coding	708953	748328	1405.51	-0.549333	0.129783	-4.2327	2.30905e-05	0.00170482
NAc	ENSG00000099889	ARVCF	22	protein_coding	19957419	20004331	252.743	-0.621081	0.151752	-4.09273	4.26327e-05	0.0025293
NAc	ENSG00000099904	ZDHHC8	22	protein_coding	20116979	20127432	251.9	-0.621296	0.155887	-3.98555	6.73238e-05	0.00356155
NAc	ENSG00000099974	DDTL	22	protein_coding	24309089	24314721	64.2427	-0.542596	0.147892	-3.66886	0.00024363	0.0082929
NAc	ENSG00000100258	LMF2	22	protein_coding	50941378	50946120	161.04	-0.557254	0.129055	-4.31796	1.57481e-05	0.0013667
NAc	ENSG00000100276	RASL10A	22	protein_coding	29708922	29711681	71.5259	-0.590382	0.101932	-5.79195	6.95756e-09	5.6201e-06
NAc	ENSG00000100368	CSF2RB	22	protein_coding	37309670	37336491	29.9612	0.648567	0.194276	3.33838	0.000842698	0.0183933
NAc	ENSG00000100433	KCNK10	14	protein_coding	88649113	88793251	148.966	0.588467	0.20828	2.82536	0.00472272	0.054528
NAc	ENSG00000100726	TELO2	16	protein_coding	1543345	1557326	130.824	-0.690855	0.156612	-4.41125	1.02775e-05	0.000990128
NAc	ENSG00000100767	PAPLN	14	protein_coding	73704205	73741348	374.027	-0.732638	0.180644	-4.05569	4.9986e-05	0.00286832
NAc	ENSG00000100906	NFKBIA	14	protein_coding	35870717	35873952	407.648	0.550874	0.198249	2.7787	0.00545777	0.0596994
NAc	ENSG00000101049	SGK2	20	protein_coding	42187608	42214317	151.028	0.630336	0.227242	2.77385	0.00553964	0.06009
NAc	ENSG00000101198	NKAIN4	20	protein_coding	61872136	61884789	353.107	-0.517787	0.115569	-4.48033	7.45287e-06	0.000774877
NAc	ENSG00000101203	COL20A1	20	protein_coding	61924538	61962285	105.471	-0.676751	0.198421	-3.41068	0.000648001	0.015607
NAc	ENSG00000101331	CCM2L	20	protein_coding	30598253	30619983	23.2033	-0.59245	0.165603	-3.57752	0.000346868	0.0103774
NAc	ENSG00000101336	HCK	20	protein_coding	30640000	30689322	68.4866	0.671676	0.220646	3.04413	0.00233352	0.0350218
NAc	ENSG00000102109	PCSK1N	X	protein_coding	48689504	48694035	344.45	-0.953731	0.166146	-5.74032	9.44953e-09	6.84341e-06
NAc	ENSG00000102265	TIMP1	X	protein_coding	47441712	47446188	111.209	0.533558	0.179927	2.96542	0.00302274	0.0413573
NAc	ENSG00000102524	TNFSF13B	13	protein_coding	108903588	108922765	57.7262	0.520381	0.140147	3.71311	0.000204725	0.0072629
NAc	ENSG00000102890	ELMO3	16	protein_coding	67233014	67237932	46.4398	-0.635444	0.150433	-4.22409	2.3991e-05	0.00173744
NAc	ENSG00000103024	NME3	16	protein_coding	1820287	1821731	127.201	-0.627015	0.110611	-5.66864	1.43936e-08	9.19164e-06
NAc	ENSG00000103175	WFDC1	16	protein_coding	84328252	84363450	77.1638	-0.61787	0.179937	-3.43381	0.00059517	0.0147926
NAc	ENSG00000103196	CRISPLD2	16	protein_coding	84853590	84943114	170.98	1.11804	0.307655	3.63406	0.000278991	0.00892124
NAc	ENSG00000103253	HAGHL	16	protein_coding	776936	779733	137.919	-0.681489	0.158337	-4.30404	1.67711e-05	0.00143182
NAc	ENSG00000103254	FAM173A	16	protein_coding	770581	772589	61.8751	-1.04772	0.179761	-5.82839	5.59644e-09	4.70146e-06
NAc	ENSG00000103260	METRN	16	protein_coding	765115	769655	458.624	-0.721669	0.116502	-6.19449	5.84735e-10	8.18707e-07
NAc	ENSG00000103269	RHBDL1	16	protein_coding	725666	728268	70.9516	-0.645907	0.151818	-4.25449	2.09526e-05	0.00160601
NAc	ENSG00000103326	CAPN15	16	protein_coding	577717	597392	138.172	-0.852647	0.171204	-4.98029	6.34891e-07	0.000127146
NAc	ENSG00000103335	PIEZO1	16	protein_coding	88781751	88782685	274.834	-0.543622	0.142942	-3.80311	0.000142891	0.00567908
NAc	ENSG00000104866	PPP1R37	19	protein_coding	45594654	45596414	333.247	-0.505764	0.095895	-5.27415	1.33374e-07	4.30943e-05
NAc	ENSG00000104903	LYL1	19	protein_coding	13209847	13213681	19.7614	-0.739529	0.159318	-4.64185	3.45303e-06	0.000439518
NAc	ENSG00000104936	DMPK	19	protein_coding	46272975	46285736	207.308	-0.580792	0.19177	-3.02859	0.00245702	0.0360351
NAc	ENSG00000105204	DYRK1B	19	protein_coding	40315990	40324274	163.186	-0.553955	0.155451	-3.56354	0.000365882	0.0106874
NAc	ENSG00000105278	ZFR2	19	protein_coding	3804022	3869026	185.56	-0.503996	0.195065	-2.58374	0.00977368	0.0838851
NAc	ENSG00000105281	SLC1A5	19	protein_coding	47278140	47291851	35.736	0.641279	0.199052	3.22167	0.00127445	0.0241603
NAc	ENSG00000105376	ICAM5	19	protein_coding	10400657	10407454	500.406	-0.501931	0.199734	-2.51299	0.0119711	0.0944824
NAc	ENSG00000105429	MEGF8	19	protein_coding	42829761	42882921	1919.08	-0.537903	0.169921	-3.16561	0.00154761	0.0269011
NAc	ENSG00000105472	CLEC11A	19	protein_coding	51226586	51228974	18.1057	-0.577733	0.180311	-3.20408	0.00135493	0.0249693
NAc	ENSG00000105509	HAS1	19	protein_coding	52216365	52223194	25.7591	-0.626542	0.155262	-4.03538	5.45148e-05	0.00304089
NAc	ENSG00000105642	KCNN1	19	protein_coding	18062102	18110889	173.113	-0.505671	0.15032	-3.36396	0.000768321	0.017434
NAc	ENSG00000105655	ISYNA1	19	protein_coding	18545198	18548921	140.883	-0.533163	0.126924	-4.20064	2.66166e-05	0.00183279
NAc	ENSG00000105699	LSR	19	protein_coding	35739233	35753626	93.2442	-0.563984	0.131773	-4.27995	1.86936e-05	0.00152172
NAc	ENSG00000105835	NAMPT	7	protein_coding	105888731	105925638	1576.58	1.04582	0.207484	5.04049	4.64351e-07	0.000102656
NAc	ENSG00000105963	ADAP1	7	protein_coding	937540	994333	145.854	-0.823115	0.154805	-5.31712	1.05425e-07	3.51451e-05
NAc	ENSG00000106003	LFNG	7	protein_coding	2552163	2568061	204.479	-0.533759	0.146236	-3.64998	0.000262263	0.00866664
NAc	ENSG00000106009	BRAT1	7	protein_coding	2577511	2595361	255.994	-0.534765	0.0962156	-5.55798	2.72908e-08	1.35881e-05
NAc	ENSG00000107281	NPDC1	9	protein_coding	139933922	139938544	586.193	-0.58258	0.129914	-4.48435	7.31349e-06	0.000767989
NAc	ENSG00000107404	DVL1	1	protein_coding	1270656	1284492	604.986	-0.509499	0.108897	-4.67873	2.88663e-06	0.000388099
NAc	ENSG00000107438	PDLIM1	10	protein_coding	96997329	97050781	27.7318	1.18843	0.317263	3.74588	0.00017976	0.00662337
NAc	ENSG00000107872	FBXL15	10	protein_coding	104178946	104181906	100.26	-0.523829	0.0981467	-5.33721	9.43888e-08	3.30392e-05
NAc	ENSG00000108557	RAI1	17	protein_coding	17584787	17714767	578.731	-0.621278	0.217219	-2.86014	0.00423448	0.0510227
NAc	ENSG00000109099	PMP22	17	protein_coding	15133095	15165906	1013.36	0.558708	0.172244	3.24371	0.00117985	0.0228801
NAc	ENSG00000109736	MFSD10	4	protein_coding	2932288	2935674	160.706	-0.727321	0.121578	-5.98234	2.19955e-09	2.19976e-06
NAc	ENSG00000109846	CRYAB	11	protein_coding	111779289	111782738	1544.05	0.515226	0.202542	2.5438	0.0109653	0.0896359
NAc	ENSG00000110079	MS4A4A	11	protein_coding	60048014	60075653	37.1309	0.698374	0.264236	2.64299	0.0082177	0.0758634
NAc	ENSG00000110697	PITPNM1	11	protein_coding	67259239	67271840	569.109	-0.554938	0.12328	-4.50145	6.74929e-06	0.000726916
NAc	ENSG00000110852	CLEC2B	12	protein_coding	10005583	10022735	37.8724	0.59277	0.225353	2.6304	0.00852837	0.0776052
NAc	ENSG00000112096	SOD2	6	protein_coding	160090089	160114360	5508.53	0.612168	0.175276	3.49259	0.000478361	0.0128802
NAc	ENSG00000112787	FBRSL1	12	protein_coding	133066137	133161774	152.797	-0.709255	0.211896	-3.34719	0.000816351	0.0181972
NAc	ENSG00000113262	GRM6	5	protein_coding	178408658	178422299	34.4175	-0.580393	0.211613	-2.74271	0.00609354	0.0634804
NAc	ENSG00000113368	LMNB1	5	protein_coding	126112315	126172706	125.335	0.577917	0.146014	3.95795	7.55965e-05	0.00386297
NAc	ENSG00000113369	ARRDC3	5	protein_coding	90664541	90679176	1053.26	0.859557	0.18066	4.75786	1.95653e-06	0.00029562
NAc	ENSG00000113763	UNC5A	5	protein_coding	176237478	176307896	247.711	-0.557259	0.218444	-2.55104	0.0107403	0.0885203
NAc	ENSG00000114554	PLXNA1	3	protein_coding	126707437	126756235	573.324	-0.550707	0.201048	-2.73917	0.00615937	0.063957
NAc	ENSG00000115165	CYTIP	2	protein_coding	158271131	158300654	27.2144	0.729891	0.204797	3.56398	0.000365274	0.0106845
NAc	ENSG00000115257	PCSK4	19	protein_coding	1481427	1490334	29.7575	-0.646573	0.207354	-3.11821	0.00181952	0.0300237
NAc	ENSG00000115266	APC2	19	protein_coding	1446300	1455256	1065.28	-0.805621	0.22263	-3.61866	0.00029613	0.00932433
NAc	ENSG00000115271	GCA	2	protein_coding	163175350	163213344	414.416	0.542975	0.142388	3.81334	0.000137099	0.005591
NAc	ENSG00000115286	NDUFS7	19	protein_coding	1383526	1393544	271.015	-0.525991	0.110981	-4.73946	2.14293e-06	0.000316942
NAc	ENSG00000116544	DLGAP3	1	protein_coding	35331037	35395186	811.993	-0.570629	0.187514	-3.04312	0.00234138	0.0350739
NAc	ENSG00000116574	RHOU	1	protein_coding	228870824	228882416	1478.62	0.768183	0.23588	3.25666	0.00112729	0.0222305
NAc	ENSG00000116717	GADD45A	1	protein_coding	68150744	68154021	194.137	0.991387	0.304808	3.2525	0.00114395	0.0224746
NAc	ENSG00000116990	MYCL	1	protein_coding	40361098	40367685	47.4319	0.654965	0.125751	5.20841	1.90461e-07	5.71438e-05
NAc	ENSG00000117013	KCNQ4	1	protein_coding	41249684	41306124	43.073	-0.546942	0.187334	-2.91961	0.0035047	0.0454417
NAc	ENSG00000117228	GBP1	1	protein_coding	89518002	89531043	165.646	0.635311	0.206213	3.08084	0.00206415	0.0324807
NAc	ENSG00000117525	F3	1	protein_coding	94994781	95007356	1563.82	0.749107	0.270321	2.77117	0.00558552	0.0602883
NAc	ENSG00000118503	TNFAIP3	6	protein_coding	138188351	138192441	79.1332	0.737852	0.214118	3.446	0.00056895	0.0143792
NAc	ENSG00000118515	SGK1	6	protein_coding	134490384	134639196	1401.2	0.549407	0.181552	3.02617	0.00247673	0.0361979
NAc	ENSG00000118777	ABCG2	4	protein_coding	89011416	89152474	730.319	-0.598583	0.221379	-2.70389	0.00685338	0.0684767
NAc	ENSG00000118785	SPP1	4	protein_coding	88896819	88904562	2669.32	0.997587	0.272357	3.66279	0.000249484	0.00839034
NAc	ENSG00000118985	ELL2	5	protein_coding	95220802	95297775	1152.83	0.863125	0.25306	3.41075	0.00064785	0.015607
NAc	ENSG00000119574	ZBTB45	19	protein_coding	59024897	59030921	59.8153	-0.540351	0.123932	-4.36005	1.30035e-05	0.00119257
NAc	ENSG00000120708	TGFBI	5	protein_coding	135364584	135399506	87.0267	0.733429	0.252103	2.90924	0.00362311	0.0461799
NAc	ENSG00000120875	DUSP4	8	protein_coding	29190581	29208185	83.905	-0.542433	0.196756	-2.75688	0.00583565	0.0618425
NAc	ENSG00000120889	TNFRSF10B	8	protein_coding	22877646	22885481	128.174	0.649693	0.161447	4.02418	5.71735e-05	0.00313514
NAc	ENSG00000121005	CRISPLD1	8	protein_coding	75896750	75946793	225.927	0.82754	0.26681	3.1016	0.00192476	0.0309761
NAc	ENSG00000121039	RDH10	8	protein_coding	74206847	74237516	265.922	0.528378	0.179181	2.94885	0.00318961	0.0429412
NAc	ENSG00000121753	BAI2	1	protein_coding	32192718	32196906	1755.17	-0.594633	0.170449	-3.48862	0.000485515	0.012973
NAc	ENSG00000121858	TNFSF10	3	protein_coding	172223298	172241297	104.645	-0.777857	0.267642	-2.90633	0.00365692	0.0463504
NAc	ENSG00000122386	ZNF205	16	protein_coding	3162561	3170518	52.5345	-0.82332	0.135358	-6.08256	1.18279e-09	1.32452e-06
NAc	ENSG00000122694	GLIPR2	9	protein_coding	36136739	36162907	111.828	0.607843	0.186691	3.25588	0.00113041	0.0222709
NAc	ENSG00000122756	CNTFR	9	protein_coding	34551430	34589704	208.134	-0.678662	0.179337	-3.78428	0.000154155	0.0059844
NAc	ENSG00000122862	SRGN	10	protein_coding	70847862	70864297	341.156	0.998677	0.237154	4.21108	2.54152e-05	0.00177923
NAc	ENSG00000122863	CHST3	10	protein_coding	73724123	73773322	417.126	0.590081	0.23467	2.51451	0.0119197	0.094289
NAc	ENSG00000123374	CDK2	12	protein_coding	56360553	56366568	39.7827	1.01323	0.248316	4.08042	4.49549e-05	0.00262262
NAc	ENSG00000123453	SARDH	9	protein_coding	136528682	136605042	48.013	-0.552371	0.200358	-2.75691	0.00583499	0.0618425
NAc	ENSG00000123989	CHPF	2	protein_coding	220403669	220408509	247.944	-0.559601	0.14441	-3.87509	0.000106584	0.00473252
NAc	ENSG00000124205	EDN3	20	protein_coding	57875482	57901047	34.0459	-0.856173	0.217888	-3.92941	8.51536e-05	0.00413981
NAc	ENSG00000124302	CHST8	19	protein_coding	34112861	34263228	31.3355	-0.679667	0.251366	-2.7039	0.00685315	0.0684767
NAc	ENSG00000124440	HIF3A	19	protein_coding	46800303	46812523	205.999	-0.788694	0.303998	-2.5944	0.00947553	0.0826181
NAc	ENSG00000124491	F13A1	6	protein_coding	6144318	6321067	151.903	0.607536	0.19146	3.17318	0.0015078	0.0266331
NAc	ENSG00000124762	CDKN1A	6	protein_coding	36644305	36652288	273.967	1.61708	0.389354	4.15324	3.27799e-05	0.0021038
NAc	ENSG00000125089	SH3TC1	4	protein_coding	8183799	8214556	111.604	0.584053	0.221688	2.63457	0.00842431	0.0769919
NAc	ENSG00000125122	LRRC29	16	protein_coding	67241042	67260913	50.4667	-0.625082	0.14787	-4.22724	2.36575e-05	0.00172608
NAc	ENSG00000125148	MT2A	16	protein_coding	56642111	56643409	414.414	0.704235	0.256482	2.74575	0.00603735	0.0630521
NAc	ENSG00000125347	IRF1	5	protein_coding	131817301	131826490	167.149	0.63678	0.20493	3.1073	0.00188807	0.0306553
NAc	ENSG00000125503	PPP1R12C	19	protein_coding	55602281	55628927	629.178	-0.533746	0.102699	-5.1972	2.02314e-07	5.90139e-05
NAc	ENSG00000125534	PPDPF	20	protein_coding	62152077	62153559	117.707	-0.583116	0.194761	-2.99401	0.00275335	0.0390451
NAc	ENSG00000125733	TRIP10	19	protein_coding	6737936	6751511	67.3937	0.777244	0.242353	3.20707	0.00134093	0.0248564
NAc	ENSG00000125810	CD93	20	protein_coding	23059986	23066977	196.874	1.34743	0.303979	4.43263	9.3089e-06	0.000926566
NAc	ENSG00000125820	NKX2-2	20	protein_coding	21491648	21494664	30.4448	-0.555981	0.210062	-2.64675	0.00812699	0.0752239
NAc	ENSG00000125898	FAM110A	20	protein_coding	814358	826922	23.0254	-0.533028	0.171688	-3.10464	0.00190511	0.0307778
NAc	ENSG00000125912	NCLN	19	protein_coding	3185561	3207854	256.48	-0.512694	0.10391	-4.93402	8.05555e-07	0.000151056
NAc	ENSG00000126243	LRFN3	19	protein_coding	36426260	36427694	84.4875	-0.591581	0.187217	-3.15988	0.00157835	0.0272379
NAc	ENSG00000126461	SCAF1	19	protein_coding	50145382	50161899	305.421	-0.648613	0.233877	-2.77331	0.00554899	0.0601031
NAc	ENSG00000126705	AHDC1	1	protein_coding	27860546	27930102	330.214	-0.710367	0.233888	-3.03721	0.0023878	0.0356154
NAc	ENSG00000127241	MASP1	3	protein_coding	186935942	187009810	243.623	0.719326	0.220099	3.26819	0.00108238	0.0216146
NAc	ENSG00000127415	IDUA	4	protein_coding	980785	998294	80.8529	-0.628234	0.224778	-2.79491	0.00519134	0.0580557
NAc	ENSG00000127472	PLA2G5	1	protein_coding	20354672	20417683	39.5553	-0.549412	0.155061	-3.54319	0.000395318	0.0112347
NAc	ENSG00000127507	EMR2	19	protein_coding	14843205	14889349	44.5017	1.05497	0.301079	3.50395	0.000458409	0.0125032
NAc	ENSG00000127580	WDR24	16	protein_coding	734622	740400	71.101	-0.627928	0.154881	-4.05425	5.02944e-05	0.00287611
NAc	ENSG00000127954	STEAP4	7	protein_coding	87905744	87936206	49.1854	1.10161	0.278454	3.95616	7.61631e-05	0.00388247
NAc	ENSG00000128011	LRFN1	19	protein_coding	39797208	39805976	27.9769	-1.30637	0.304052	-4.29655	1.73473e-05	0.00146812
NAc	ENSG00000128016	ZFP36	19	protein_coding	39897453	39900052	190.351	1.49482	0.429939	3.47682	0.000507397	0.0134077
NAc	ENSG00000128564	VGF	7	protein_coding	100805790	100808874	282.022	-0.996561	0.205875	-4.8406	1.29446e-06	0.000218043
NAc	ENSG00000129204	USP6	17	protein_coding	5019733	5078286	163.248	0.552329	0.206958	2.6688	0.00761229	0.0729016
NAc	ENSG00000129450	SIGLEC9	19	protein_coding	51628165	51633567	23.5903	0.709366	0.273643	2.5923	0.00953359	0.0829774
NAc	ENSG00000129946	SHC2	19	protein_coding	416583	419879	287.129	-0.532537	0.190574	-2.79438	0.00519989	0.0580894
NAc	ENSG00000129968	ABHD17A	19	protein_coding	1876809	1885546	458.054	-0.599112	0.10095	-5.93471	2.94363e-09	2.81009e-06
NAc	ENSG00000129993	CBFA2T3	16	protein_coding	88941266	89007606	46.0606	-0.743137	0.290276	-2.5601	0.0104641	0.0872091
NAc	ENSG00000130203	APOE	19	protein_coding	45409011	45412650	3934.69	-0.557259	0.0985452	-5.65486	1.55977e-08	9.63482e-06
NAc	ENSG00000130307	USHBP1	19	protein_coding	17359985	17375605	28.9404	-0.602775	0.220458	-2.7342	0.00625323	0.0644091
NAc	ENSG00000130479	MAP1S	19	protein_coding	17830051	17836762	237.16	-0.868625	0.176492	-4.92161	8.58364e-07	0.000159534
NAc	ENSG00000130511	SSBP4	19	protein_coding	18529674	18543024	373.774	-0.743676	0.153699	-4.83851	1.30814e-06	0.000218043
NAc	ENSG00000130702	LAMA5	20	protein_coding	60883011	60884313	188.695	-0.614331	0.239056	-2.56982	0.0101751	0.0856507
NAc	ENSG00000130748	TMEM160	19	protein_coding	47549165	47551888	38.627	-0.595667	0.163206	-3.64979	0.00026245	0.00866664
NAc	ENSG00000130758	MAP3K10	19	protein_coding	40697651	40721482	626.209	-0.509943	0.113023	-4.51183	6.42695e-06	0.000706695
NAc	ENSG00000130775	THEMIS2	1	protein_coding	28199055	28213196	103.591	0.732902	0.18063	4.05747	4.96062e-05	0.00285433
NAc	ENSG00000130881	LRP3	19	protein_coding	33668509	33696197	548.278	-0.695618	0.132411	-5.25346	1.49267e-07	4.67895e-05
NAc	ENSG00000130948	HSD17B3	9	protein_coding	98997588	99002186	34.2478	0.500088	0.183861	2.71992	0.00652977	0.0663144
NAc	ENSG00000130958	SLC35D2	9	protein_coding	99082988	99086451	160.855	0.522448	0.170665	3.06125	0.00220419	0.03379
NAc	ENSG00000131094	C1QL1	17	protein_coding	43037061	43045439	37.4088	-0.589921	0.232019	-2.54255	0.0110047	0.0897901
NAc	ENSG00000131188	PRR7	5	protein_coding	176873446	176882833	51.7459	-1.10726	0.14704	-7.53036	5.05998e-14	5.31348e-10
NAc	ENSG00000131409	LRRC4B	19	protein_coding	51020149	51054299	832.373	-0.749378	0.123532	-6.06625	1.30934e-09	1.37494e-06
NAc	ENSG00000131477	RAMP2	17	protein_coding	40910465	40913917	36.3839	-0.689976	0.162615	-4.24301	2.20541e-05	0.00166612
NAc	ENSG00000131873	CHSY1	15	protein_coding	101715928	101792137	568.119	0.556642	0.160824	3.46119	0.000537795	0.0138416
NAc	ENSG00000132003	ZSWIM4	19	protein_coding	13906274	13943044	35.8024	-0.527138	0.192465	-2.73887	0.00616501	0.0639711
NAc	ENSG00000132005	RFX1	19	protein_coding	14072350	14117097	66.9129	-0.690299	0.234422	-2.94469	0.00323281	0.0433836
NAc	ENSG00000132274	TRIM22	11	protein_coding	5710919	5732093	307.546	0.714873	0.169907	4.20745	2.58272e-05	0.00179773
NAc	ENSG00000132475	H3F3B	17	protein_coding	73772515	73775860	3416.42	0.515623	0.151746	3.39794	0.000678956	0.0161124
NAc	ENSG00000132613	MTSS1L	16	protein_coding	70695107	70719969	683.325	-0.518407	0.1239	-4.18406	2.86344e-05	0.00192785
NAc	ENSG00000132622	HSPA12B	20	protein_coding	3713314	3733758	67.5063	-0.700832	0.174412	-4.01826	5.86285e-05	0.00319524
NAc	ENSG00000132965	ALOX5AP	13	protein_coding	31309645	31338556	44.1352	0.92273	0.258875	3.56438	0.000364717	0.0106845
NAc	ENSG00000133243	BTBD2	19	protein_coding	1985447	1988568	536.099	-0.61883	0.144054	-4.2958	1.74061e-05	0.00146812
NAc	ENSG00000133250	ZNF414	19	protein_coding	8575462	8579044	30.606	-0.573502	0.170625	-3.36118	0.000776108	0.0175267
NAc	ENSG00000133275	CSNK1G2	19	protein_coding	1941188	1981337	307.94	-0.519103	0.0915839	-5.66806	1.44426e-08	9.19164e-06
NAc	ENSG00000133315	MACROD1	11	protein_coding	63766030	63933533	44.0801	-0.65502	0.155423	-4.21443	2.5041e-05	0.00177674
NAc	ENSG00000133321	RARRES3	11	protein_coding	63304281	63313934	77.8402	0.502146	0.148201	3.38829	0.000703308	0.0164736
NAc	ENSG00000133874	RNF122	8	protein_coding	33405273	33424643	36.476	1.57302	0.343893	4.57417	4.78114e-06	0.000573791
NAc	ENSG00000134531	EMP1	12	protein_coding	13349650	13369708	339.089	1.14935	0.308893	3.72086	0.000198546	0.0070916
NAc	ENSG00000134755	DSC2	18	protein_coding	28645940	28681967	138.643	0.624437	0.157942	3.95359	7.6987e-05	0.00390551
NAc	ENSG00000134780	DAGLA	11	protein_coding	61447905	61514473	269.478	-0.522605	0.195095	-2.67873	0.00739027	0.0716908
NAc	ENSG00000134851	TMEM165	4	protein_coding	56262124	56291824	1260.09	0.523499	0.157558	3.32259	0.000891863	0.0191522
NAc	ENSG00000135063	FAM189A2	9	protein_coding	71944241	72007370	373.832	0.680014	0.236137	2.87974	0.00397998	0.0490537
NAc	ENSG00000135245	HILPDA	7	protein_coding	128095903	128097978	402.926	1.91047	0.569318	3.35571	0.000791608	0.017777
NAc	ENSG00000135625	EGR4	2	protein_coding	73518062	73520833	53.378	-1.05626	0.278838	-3.7881	0.000151806	0.00592044
NAc	ENSG00000135637	CCDC142	2	protein_coding	74699113	74709669	103.636	-0.506574	0.102617	-4.93658	7.95054e-07	0.00015043
NAc	ENSG00000135842	FAM129A	1	protein_coding	184759858	184775119	113.573	0.535471	0.192456	2.7823	0.00539758	0.0592887
NAc	ENSG00000135973	GPR45	2	protein_coding	105858200	105859924	21.7804	-0.570422	0.15557	-3.66665	0.000245747	0.00833794
NAc	ENSG00000136099	PCDH8	13	protein_coding	53418109	53422775	332.573	-0.631403	0.151641	-4.1638	3.13001e-05	0.0020415
NAc	ENSG00000136167	LCP1	13	protein_coding	46700055	46785483	181.838	0.514289	0.160692	3.20046	0.00137208	0.02511
NAc	ENSG00000136213	CHST12	7	protein_coding	2443223	2474242	84.8321	-0.50017	0.157184	-3.18206	0.00146231	0.0261361
NAc	ENSG00000136295	TTYH3	7	protein_coding	2671585	2704436	370.258	-0.771283	0.249766	-3.08802	0.00201492	0.0319136
NAc	ENSG00000136297	MMD2	7	protein_coding	4945620	4998822	414.972	-0.534214	0.183286	-2.91465	0.0035609	0.0457714
NAc	ENSG00000137193	PIM1	6	protein_coding	37137979	37143202	106.861	0.88961	0.299513	2.97018	0.0029762	0.0409877
NAc	ENSG00000137462	TLR2	4	protein_coding	154622652	154626851	188.59	1.41954	0.284975	4.9813	6.31577e-07	0.000127146
NAc	ENSG00000137558	PI15	8	protein_coding	75736772	75767264	187.859	0.847855	0.26117	3.24637	0.00116887	0.0227513
NAc	ENSG00000137752	CASP1	11	protein_coding	104896170	104901230	55.9349	0.627706	0.248265	2.52837	0.0114593	0.0921493
NAc	ENSG00000137801	THBS1	15	protein_coding	39873280	39874608	693.445	0.854069	0.220043	3.88137	0.000103869	0.00465128
NAc	ENSG00000138061	CYP1B1	2	protein_coding	38294116	38297840	297.872	0.78216	0.210846	3.70963	0.000207565	0.00735124
NAc	ENSG00000138135	CH25H	10	protein_coding	90965694	90967071	49.3708	1.3697	0.489304	2.79928	0.0051216	0.0574286
NAc	ENSG00000138356	AOX1	2	protein_coding	201450591	201536214	56.0905	0.72983	0.152397	4.78901	1.67605e-06	0.000262689
NAc	ENSG00000139083	ETV6	12	protein_coding	11802788	12048336	174.843	0.513255	0.193404	2.65379	0.00795924	0.0745993
NAc	ENSG00000139117	CPNE8	12	protein_coding	39040624	39073424	370.265	0.608825	0.202547	3.00584	0.00264849	0.0379942
NAc	ENSG00000139438	FAM222A	12	protein_coding	110152033	110208312	160.697	-0.512887	0.157053	-3.26569	0.00109197	0.0216866
NAc	ENSG00000139629	GALNT6	12	protein_coding	51745031	51777347	128.17	0.897169	0.283385	3.1659	0.00154604	0.0269011
NAc	ENSG00000139725	RHOF	12	protein_coding	122215664	122232168	18.4143	-1.05943	0.19202	-5.51728	3.44289e-08	1.60683e-05
NAc	ENSG00000139737	SLAIN1	13	protein_coding	78272023	78320789	2260.25	0.545051	0.184816	2.94916	0.00318639	0.0429253
NAc	ENSG00000139800	ZIC5	13	protein_coding	100615218	100624163	29.4729	-0.525261	0.205495	-2.55608	0.0105858	0.0876514
NAc	ENSG00000139832	RAB20	13	protein_coding	111175417	111214080	31.632	0.992687	0.319881	3.1033	0.00191377	0.0308702
NAc	ENSG00000140406	MESDC1	15	protein_coding	81293295	81296342	162.078	-0.676971	0.167054	-4.05242	5.06912e-05	0.00287734
NAc	ENSG00000140511	HAPLN3	15	protein_coding	89420519	89438857	27.0035	0.655791	0.251043	2.61227	0.00899443	0.0798398
NAc	ENSG00000140691	ARMC5	16	protein_coding	31469401	31478426	79.7864	-0.563692	0.131951	-4.27198	1.93743e-05	0.00154862
NAc	ENSG00000140983	RHOT2	16	protein_coding	718086	724174	302.047	-0.507744	0.112206	-4.52511	6.03632e-06	0.000679323
NAc	ENSG00000141577	AZI1	17	protein_coding	79163393	79196745	79.4626	-0.759427	0.134699	-5.63797	1.72067e-08	1.00559e-05
NAc	ENSG00000141933	TPGS1	19	protein_coding	507299	519654	31.9546	-0.692034	0.158816	-4.35747	1.31575e-05	0.00120145
NAc	ENSG00000142156	COL6A1	21	protein_coding	47401651	47424964	415.576	-0.575397	0.195292	-2.94634	0.00321556	0.0432073
NAc	ENSG00000142235	LMTK3	19	protein_coding	48988528	49015061	582.889	-0.670479	0.228526	-2.93392	0.00334707	0.0441645
NAc	ENSG00000142279	WTIP	19	protein_coding	34972543	34997258	67.4512	-0.580916	0.138802	-4.18521	2.84906e-05	0.00192785
NAc	ENSG00000142327	RNPEPL1	2	protein_coding	241505221	241516144	170.779	-0.507733	0.12766	-3.97722	6.97247e-05	0.00364917
NAc	ENSG00000142409	ZNF787	19	protein_coding	56598732	56632649	70.1825	-0.652694	0.100578	-6.48945	8.61501e-11	1.50777e-07
NAc	ENSG00000142449	FBN3	19	protein_coding	8130286	8214730	18.4086	-0.55343	0.219739	-2.51858	0.0117829	0.0936736
NAc	ENSG00000142583	SLC2A5	1	protein_coding	9095166	9129775	217.183	1.22945	0.345726	3.55615	0.000376333	0.0109167
NAc	ENSG00000142611	PRDM16	1	protein_coding	2985732	3350906	129.382	-0.619237	0.186417	-3.32179	0.000894427	0.0191661
NAc	ENSG00000142694	EVA1B	1	protein_coding	36787632	36789755	16.4319	-0.584325	0.20608	-2.83542	0.00457652	0.0535764
NAc	ENSG00000142731	PLK4	4	protein_coding	128802016	128820350	73.6704	0.638197	0.150857	4.23046	2.33212e-05	0.00171256
NAc	ENSG00000143226	FCGR2A	1	protein_coding	161475220	161488348	150.592	1.37172	0.255899	5.36039	8.30407e-08	3.02561e-05
NAc	ENSG00000143333	RGS16	1	protein_coding	182567758	182573543	114.692	1.14666	0.304809	3.76191	0.000168624	0.00635805
NAc	ENSG00000144119	C1QL2	2	protein_coding	119913819	119916465	26.8946	-0.632829	0.181219	-3.49206	0.000479313	0.0128893
NAc	ENSG00000144655	CSRNP1	3	protein_coding	39183346	39195066	231.54	0.989974	0.271684	3.64384	0.000268597	0.00878877
NAc	ENSG00000144802	NFKBIZ	3	protein_coding	101546835	101570970	185.653	0.532202	0.174669	3.04691	0.00231206	0.0348836
NAc	ENSG00000145198	VWA5B2	3	protein_coding	183948217	183960117	226.153	-0.594701	0.201953	-2.94474	0.00323224	0.0433836
NAc	ENSG00000145217	SLC26A1	4	protein_coding	972861	987164	56.8874	-0.786483	0.188098	-4.18125	2.89917e-05	0.0019339
NAc	ENSG00000145365	TIFA	4	protein_coding	113195698	113207059	61.5241	0.621507	0.228148	2.72414	0.00644696	0.0657164
NAc	ENSG00000145623	OSMR	5	protein_coding	38845960	38886759	366.649	1.07237	0.36981	2.89978	0.0037342	0.0469896
NAc	ENSG00000147144	CCDC120	X	protein_coding	48911101	48926000	57.368	-0.539528	0.203585	-2.65013	0.00804606	0.0748045
NAc	ENSG00000147799	ARHGAP39	8	protein_coding	145754563	145831084	161.501	-0.696683	0.226375	-3.07756	0.00208704	0.0327105
NAc	ENSG00000148400	NOTCH1	9	protein_coding	139388896	139440314	493.527	-0.639565	0.172799	-3.7012	0.000214584	0.00749865
NAc	ENSG00000148926	ADM	11	protein_coding	10326227	10328944	134.832	1.4995	0.472862	3.17111	0.00151856	0.0267108
NAc	ENSG00000149091	DGKZ	11	protein_coding	46354455	46402104	1560.47	-0.551646	0.139927	-3.94237	8.06797e-05	0.00403031
NAc	ENSG00000149150	SLC43A1	11	protein_coding	57252007	57283259	30.6454	-0.573633	0.157658	-3.63847	0.000274263	0.00883447
NAc	ENSG00000149451	ADAM33	20	protein_coding	3648612	3654394	71.697	-0.601808	0.16421	-3.66486	0.000247475	0.00835671
NAc	ENSG00000149527	PLCH2	1	protein_coding	2357419	2411243	291.947	-0.547803	0.188728	-2.90261	0.00370065	0.0467636
NAc	ENSG00000149573	MPZL2	11	protein_coding	118124118	118134997	43.1301	1.16892	0.346675	3.37182	0.000746736	0.0171774
NAc	ENSG00000149654	CDH22	20	protein_coding	44802372	44880334	105.725	-0.591906	0.193248	-3.06293	0.00219178	0.0337074
NAc	ENSG00000149761	NUDT22	11	protein_coding	63993413	63994495	76.0577	-0.573046	0.110522	-5.18491	2.16117e-07	6.05185e-05
NAc	ENSG00000150048	CLEC1A	12	protein_coding	10222153	10251584	18.4909	0.656495	0.259984	2.52514	0.0115652	0.0926504
NAc	ENSG00000150337	FCGR1A	1	protein_coding	149754227	149762946	111.843	0.95717	0.291225	3.2867	0.00101367	0.0207496
NAc	ENSG00000151651	ADAM8	10	protein_coding	135075907	135090372	36.6626	-0.598889	0.186682	-3.20807	0.00133629	0.0248011
NAc	ENSG00000152049	KCNE4	2	protein_coding	223916532	223920355	90.9107	0.886219	0.277118	3.19798	0.00138392	0.0251646
NAc	ENSG00000152082	MZT2B	2	protein_coding	130939310	130948286	160.908	-0.91228	0.115719	-7.88355	3.18204e-15	6.68293e-11
NAc	ENSG00000152229	PSTPIP2	18	protein_coding	43563502	43652223	27.1839	0.812369	0.219313	3.70416	0.00021209	0.00744869
NAc	ENSG00000152256	PDK1	2	protein_coding	173420101	173429801	577.397	0.531144	0.188951	2.81101	0.00493855	0.0560645
NAc	ENSG00000153443	UBALD1	16	protein_coding	4658884	4661524	65.3896	-0.504277	0.15568	-3.23919	0.00119869	0.0231599
NAc	ENSG00000153684	GOLGA8F	15	protein_coding	28623767	28627688	29.4386	0.638302	0.241073	2.64776	0.00810278	0.0750991
NAc	ENSG00000153714	LURAP1L	9	protein_coding	12775020	12822130	56.4318	0.510475	0.186258	2.74069	0.00613103	0.0637871
NAc	ENSG00000153822	KCNJ16	17	protein_coding	68049570	68128334	297.677	-0.718178	0.266656	-2.69328	0.00707532	0.0696979
NAc	ENSG00000154118	JPH3	16	protein_coding	87635441	87731533	1131.36	-0.572224	0.122355	-4.67675	2.91456e-06	0.000388099
NAc	ENSG00000154358	OBSCN	1	protein_coding	228395831	228548951	1894.79	-0.533888	0.209605	-2.54711	0.010862	0.0890061
NAc	ENSG00000154734	ADAMTS1	21	protein_coding	28208066	28217728	637.363	0.980497	0.276522	3.54581	0.000391406	0.0111386
NAc	ENSG00000155850	SLC26A2	5	protein_coding	149340300	149366968	296.37	0.542709	0.169004	3.21121	0.00132175	0.0246312
NAc	ENSG00000155926	SLA	8	protein_coding	134048973	134115298	205.774	0.516395	0.207478	2.48891	0.0128135	0.0986246
NAc	ENSG00000157240	FZD1	7	protein_coding	90893783	90898123	120.413	-0.558505	0.125792	-4.4399	8.99999e-06	0.000911025
NAc	ENSG00000157322	CLEC18A	16	protein_coding	69984810	69997889	85.4962	-0.514541	0.202282	-2.54368	0.0109691	0.0896359
NAc	ENSG00000157335	CLEC18C	16	protein_coding	70207225	70216359	74.6062	-0.575955	0.220342	-2.61392	0.00895111	0.0796911
NAc	ENSG00000157933	SKI	1	protein_coding	2160134	2241558	679.055	-0.500603	0.201782	-2.48091	0.0131048	0.0996129
NAc	ENSG00000158050	DUSP2	2	protein_coding	96808905	96811179	37.1834	-0.671643	0.245354	-2.73745	0.00619179	0.0640591
NAc	ENSG00000158106	RHPN1	8	protein_coding	144451057	144466390	300.024	-0.633543	0.136104	-4.65485	3.24222e-06	0.000417749
NAc	ENSG00000158710	TAGLN2	1	protein_coding	159887897	159893507	256.485	0.512672	0.166052	3.08743	0.00201898	0.0319537
NAc	ENSG00000158748	HTR6	1	protein_coding	19991780	20006055	52.4923	-0.693694	0.250914	-2.76467	0.00569801	0.0610248
NAc	ENSG00000158769	F11R	1	protein_coding	160965001	160991138	100.982	0.503154	0.159998	3.14476	0.00166225	0.0280858
NAc	ENSG00000158792	SPATA2L	16	protein_coding	89762751	89768103	78.9836	-0.990322	0.1691	-5.85644	4.72888e-09	4.13816e-06
NAc	ENSG00000158859	ADAMTS4	1	protein_coding	161154098	161168846	466.952	0.793299	0.247703	3.20262	0.00136181	0.0250445
NAc	ENSG00000158869	FCER1G	1	protein_coding	161185024	161189038	40.1226	1.17487	0.275805	4.25977	2.04634e-05	0.00158588
NAc	ENSG00000159069	FBXW5	9	protein_coding	139834887	139837120	403.904	-0.574213	0.094284	-6.09024	1.12738e-09	1.32452e-06
NAc	ENSG00000159216	RUNX1	21	protein_coding	36160098	36260987	116.183	0.605821	0.195981	3.09122	0.00199333	0.0316911
NAc	ENSG00000159289	GOLGA6A	15	protein_coding	74362198	74374891	17.7863	0.683575	0.174477	3.91786	8.9338e-05	0.00423882
NAc	ENSG00000159388	BTG2	1	protein_coding	203274619	203278697	427.519	0.885732	0.225132	3.93429	8.34446e-05	0.00410422
NAc	ENSG00000159399	HK2	2	protein_coding	75061108	75120486	173.439	0.808682	0.249239	3.2446	0.00117615	0.0228506
NAc	ENSG00000159403	C1R	12	protein_coding	7187513	7189410	109.52	0.571751	0.229418	2.49217	0.0126964	0.098305
NAc	ENSG00000159860	FAM115D	7	pseudogene	143497825	143515066	51.0049	0.928343	0.34149	2.71851	0.00655771	0.0664696
NAc	ENSG00000160226	C21orf2	21	protein_coding	45748827	45759285	117.512	-0.609261	0.0929318	-6.556	5.52705e-11	1.05527e-07
NAc	ENSG00000160256	FAM207A	21	protein_coding	46359925	46396904	78.7738	-0.507115	0.0970547	-5.22504	1.7412e-07	5.2998e-05
NAc	ENSG00000160284	SPATC1L	21	protein_coding	47581062	47604390	57.6666	-0.727434	0.179446	-4.05378	5.03956e-05	0.00287611
NAc	ENSG00000160539	PPAPDC3	9	protein_coding	134165081	134184649	87.4842	-0.541153	0.117223	-4.61645	3.90353e-06	0.0004851
NAc	ENSG00000160949	TONSL	8	protein_coding	145654165	145668239	30.4871	-0.608635	0.176781	-3.44287	0.000575572	0.0144768
NAc	ENSG00000160957	RECQL4	8	protein_coding	145736671	145743229	67.2359	-0.799717	0.163965	-4.87736	1.07516e-06	0.00019466
NAc	ENSG00000160963	COL26A1	7	polymorphic_pseudogene	101006101	101202304	84.2372	-0.586562	0.171101	-3.42817	0.000607672	0.0150499
NAc	ENSG00000160972	PPP1R16A	8	protein_coding	145703352	145727503	93.6096	-0.93036	0.145516	-6.39353	1.62097e-10	2.61875e-07
NAc	ENSG00000161179	YDJC	22	protein_coding	21982378	21984301	46.0873	-0.576375	0.121732	-4.73478	2.19288e-06	0.000317619
NAc	ENSG00000161277	THAP8	19	protein_coding	36525887	36545664	35.1659	-0.535158	0.138641	-3.86002	0.000113375	0.00491965
NAc	ENSG00000161328	LRRC56	11	protein_coding	537527	554916	119.6	-0.527684	0.182489	-2.89159	0.00383303	0.0478604
NAc	ENSG00000161618	ALDH16A1	19	protein_coding	49956426	49974305	46.2709	-0.576104	0.168499	-3.41904	0.000628425	0.0153673
NAc	ENSG00000161642	ZNF385A	12	protein_coding	54762917	54779551	124.707	-0.717164	0.268589	-2.67012	0.00758251	0.0727769
NAc	ENSG00000161664	ASB16	17	protein_coding	42247815	42249577	18.2919	-0.729332	0.207726	-3.51104	0.000446363	0.0122703
NAc	ENSG00000161677	JOSD2	19	protein_coding	51009255	51014419	50.5996	-0.699218	0.163209	-4.28418	1.83413e-05	0.00152172
NAc	ENSG00000161682	FAM171A2	17	protein_coding	42430583	42441243	170.925	-0.516156	0.119638	-4.31432	1.60098e-05	0.00138369
NAc	ENSG00000161847	RAVER1	19	protein_coding	10426888	10444316	48.2264	-0.923265	0.212472	-4.34536	1.39047e-05	0.00125334
NAc	ENSG00000161896	IP6K3	6	protein_coding	33689447	33714682	73.0035	0.796806	0.315356	2.52669	0.0115144	0.0924673
NAc	ENSG00000161996	WDR90	16	protein_coding	699311	711075	117.681	-0.575922	0.151695	-3.79659	0.000146703	0.00576976
NAc	ENSG00000162062	C16orf59	16	protein_coding	2510081	2514964	26.0981	-0.574937	0.150108	-3.83016	0.000128061	0.0053468
NAc	ENSG00000162066	AMDHD2	16	protein_coding	2570358	2580492	57.9033	-0.81977	0.152728	-5.36751	7.98333e-08	3.01528e-05
NAc	ENSG00000162068	NTN3	16	protein_coding	2521500	2524146	23.6234	-0.870282	0.212087	-4.10343	4.07074e-05	0.00244967
NAc	ENSG00000162337	LRP5	11	protein_coding	68080077	68216743	109.459	-0.564575	0.154052	-3.66484	0.000247494	0.00835671
NAc	ENSG00000162493	PDPN	1	protein_coding	13909960	13944452	153.034	1.08706	0.289954	3.74906	0.000177498	0.00658767
NAc	ENSG00000162511	LAPTM5	1	protein_coding	31205316	31230667	384.378	0.661343	0.233907	2.82737	0.00469319	0.0543365
NAc	ENSG00000162591	MEGF6	1	protein_coding	3406484	3448012	45.7119	-0.904505	0.204192	-4.42968	9.43738e-06	0.000934924
NAc	ENSG00000162645	GBP2	1	protein_coding	89571815	89616139	150.941	0.638875	0.19108	3.34349	0.000827314	0.0182897
NAc	ENSG00000162747	FCGR3B	1	protein_coding	161592986	161601753	27.0255	0.898277	0.273926	3.27926	0.00104079	0.0210787
NAc	ENSG00000162772	ATF3	1	protein_coding	212738676	212792877	134.978	1.02823	0.238442	4.3123	1.61567e-05	0.00139067
NAc	ENSG00000162777	DENND2D	1	protein_coding	111729796	111731950	34.6235	0.963852	0.210178	4.58588	4.52072e-06	0.000545656
NAc	ENSG00000162975	KCNF1	2	protein_coding	11052063	11054350	327.161	-0.560205	0.129705	-4.31909	1.56677e-05	0.00136536
NAc	ENSG00000163046	ANKRD30BL	2	protein_coding	132905164	132910311	2473.39	-0.828595	0.293343	-2.82466	0.00473309	0.0545436
NAc	ENSG00000163083	INHBB	2	protein_coding	121103719	121109384	64.5531	-0.653656	0.138869	-4.707	2.51386e-06	0.000355307
NAc	ENSG00000163145	C1QTNF7	4	protein_coding	15341442	15443986	92.0422	0.687881	0.144111	4.77329	1.81244e-06	0.000278593
NAc	ENSG00000163362	C1orf106	1	protein_coding	200860176	200868666	29.0167	-0.507132	0.153395	-3.30605	0.000946224	0.0198015
NAc	ENSG00000163565	IFI16	1	protein_coding	158969758	158984719	481.363	0.828493	0.21557	3.84326	0.000121411	0.00516169
NAc	ENSG00000163638	ADAMTS9	3	protein_coding	64501333	64508187	585.986	1.56199	0.492702	3.17025	0.00152308	0.0267214
NAc	ENSG00000163659	TIPARP	3	protein_coding	156391024	156422928	863.659	0.906407	0.259329	3.4952	0.000473715	0.0128374
NAc	ENSG00000163660	CCNL1	3	protein_coding	156864297	156878549	1302.48	0.510202	0.107328	4.75366	1.99767e-06	0.000299678
NAc	ENSG00000163735	CXCL5	4	protein_coding	74861359	74864496	53.9494	0.665703	0.222133	2.99687	0.00272769	0.0388386
NAc	ENSG00000163794	UCN	2	protein_coding	27530268	27531313	18.1543	-0.665812	0.184573	-3.60731	0.000309388	0.00957407
NAc	ENSG00000163823	CCR1	3	protein_coding	46243200	46249887	59.4206	0.955456	0.290043	3.29418	0.000987077	0.0203841
NAc	ENSG00000164104	HMGB2	4	protein_coding	174252846	174256276	314.663	0.512953	0.138435	3.70538	0.000211076	0.00742548
NAc	ENSG00000164236	ANKRD33B	5	protein_coding	10564442	10649736	55.3594	-0.918871	0.240099	-3.82705	0.000129691	0.00539359
NAc	ENSG00000164620	RELL2	5	protein_coding	141016517	141020630	99.7511	-0.609077	0.130597	-4.6638	3.10417e-06	0.00040746
NAc	ENSG00000164707	SLC13A4	7	protein_coding	135365985	135370433	87.7815	-0.62727	0.186343	-3.36621	0.000762096	0.0173596
NAc	ENSG00000164880	INTS1	7	protein_coding	1509913	1544003	671.105	-0.692033	0.214242	-3.23015	0.00123724	0.0236226
NAc	ENSG00000164897	TMUB1	7	protein_coding	150778167	150780633	55.8467	-0.597889	0.141763	-4.21754	2.46985e-05	0.00177037
NAc	ENSG00000164976	KIAA1161	9	protein_coding	34366668	34376851	975.906	-0.654852	0.141162	-4.63902	3.50071e-06	0.000442903
NAc	ENSG00000165030	NFIL3	9	protein_coding	94171327	94186144	205.144	1.14663	0.254404	4.50712	6.57146e-06	0.000715098
NAc	ENSG00000165124	SVEP1	9	protein_coding	113127536	113190038	378.783	0.781788	0.302544	2.58405	0.00976477	0.0838476
NAc	ENSG00000165195	PIGA	X	protein_coding	15337578	15353645	210.848	0.621943	0.172337	3.60887	0.000307528	0.00954135
NAc	ENSG00000165507	C10orf10	10	protein_coding	45466429	45474238	407.347	1.16301	0.432952	2.68624	0.00722617	0.0706996
NAc	ENSG00000165617	DACT1	14	protein_coding	59100685	59112190	170.186	0.582027	0.166836	3.48863	0.00048551	0.012973
NAc	ENSG00000165655	ZNF503	10	protein_coding	77157588	77161664	94.3267	-0.748546	0.189037	-3.95979	7.50157e-05	0.00384263
NAc	ENSG00000165684	SNAPC4	9	protein_coding	139270029	139293249	235.377	-0.527458	0.179477	-2.93886	0.00329424	0.0438522
NAc	ENSG00000165716	FAM69B	9	protein_coding	139607022	139618502	119.343	-0.545634	0.0980756	-5.5634	2.64576e-08	1.35881e-05
NAc	ENSG00000165802	NSMF	9	protein_coding	140342022	140351989	1322.31	-0.500184	0.118886	-4.20724	2.58507e-05	0.00179773
NAc	ENSG00000165804	ZNF219	14	protein_coding	21558205	21566799	72.3363	-1.08528	0.158057	-6.86638	6.58519e-12	1.72878e-08
NAc	ENSG00000165816	VWA2	10	protein_coding	115999089	116049751	25.4735	-0.810293	0.157567	-5.14254	2.71044e-07	6.94202e-05
NAc	ENSG00000165929	TC2N	14	protein_coding	92246095	92333873	153.368	0.807143	0.229946	3.51014	0.000447873	0.0122957
NAc	ENSG00000165972	CCDC38	12	protein_coding	96260826	96263580	26.3851	0.655689	0.201863	3.24819	0.0011614	0.0227122
NAc	ENSG00000166166	TRMT61A	14	protein_coding	103995521	104003410	203.26	-0.562961	0.109063	-5.16181	2.44578e-07	6.50205e-05
NAc	ENSG00000166401	SERPINB8	18	protein_coding	61637159	61656608	47.2674	0.551222	0.200338	2.75146	0.00593305	0.062303
NAc	ENSG00000166428	PLD4	14	protein_coding	105391153	105399574	76.2905	-0.595704	0.152017	-3.91867	8.90404e-05	0.00423882
NAc	ENSG00000166535	A2ML1	12	protein_coding	8975068	9029381	137.338	-0.561091	0.170145	-3.29773	0.00097471	0.0202082
NAc	ENSG00000166897	ELFN2	22	protein_coding	37764000	37823505	670.297	-0.501235	0.155816	-3.21685	0.00129608	0.024369
NAc	ENSG00000166924	NYAP1	7	protein_coding	100081550	100092422	369.198	-0.505054	0.101028	-4.99913	5.7589e-07	0.000119751
NAc	ENSG00000166987	MBD6	12	protein_coding	57914493	57919197	108.207	-0.522557	0.202757	-2.57726	0.00995877	0.0847217
NAc	ENSG00000167100	SAMD14	17	protein_coding	48187404	48207186	239.067	-0.529756	0.129661	-4.0857	4.39437e-05	0.00257795
NAc	ENSG00000167178	ISLR2	15	protein_coding	74392652	74430881	240.906	-0.764005	0.191258	-3.99462	6.47978e-05	0.00343658
NAc	ENSG00000167434	CA4	17	protein_coding	58227297	58236901	29.6476	-0.683843	0.219663	-3.11314	0.00185108	0.0302776
NAc	ENSG00000167487	KLHL26	19	protein_coding	18747775	18781309	179.88	-0.562571	0.130951	-4.29604	1.73873e-05	0.00146812
NAc	ENSG00000167513	CDT1	16	protein_coding	88869621	88875666	25.8169	-0.537853	0.193507	-2.7795	0.00544432	0.0596687
NAc	ENSG00000167604	NFKBID	19	protein_coding	36378555	36387161	37.1363	-0.507532	0.184365	-2.75287	0.00590751	0.0622214
NAc	ENSG00000167676	PLIN4	19	protein_coding	4502204	4517716	136.342	-0.602838	0.224556	-2.68458	0.00726205	0.0708761
NAc	ENSG00000167700	MFSD3	8	protein_coding	145734457	145736596	83.8064	-0.647903	0.113757	-5.6955	1.23008e-08	8.3336e-06
NAc	ENSG00000167701	GPT	8	protein_coding	145728356	145732557	51.1713	-0.845732	0.234637	-3.60443	0.000312834	0.00961954
NAc	ENSG00000167797	CDK2AP2	11	protein_coding	67273968	67276102	96.413	-0.501615	0.108545	-4.62125	3.81436e-06	0.000476841
NAc	ENSG00000167962	ZNF598	16	protein_coding	2047655	2059765	93.5111	-0.59781	0.131062	-4.56128	5.08436e-06	0.000596546
NAc	ENSG00000167967	E4F1	16	protein_coding	2273567	2285743	215.115	-0.517148	0.118749	-4.35498	1.33081e-05	0.00120472
NAc	ENSG00000167968	DNASE1L2	16	protein_coding	2285817	2288712	20.2229	-0.919265	0.256159	-3.58865	0.00033239	0.0100156
NAc	ENSG00000167971	CASKIN1	16	protein_coding	2227184	2246526	575.356	-0.867004	0.179162	-4.83921	1.30359e-06	0.000218043
NAc	ENSG00000168056	LTBP3	11	protein_coding	65306276	65325430	518.701	-0.528084	0.164805	-3.20431	0.00135387	0.0249693
NAc	ENSG00000168071	CCDC88B	11	protein_coding	64107695	64124996	97.9191	-0.593105	0.151137	-3.92429	8.69843e-05	0.00417679
NAc	ENSG00000168135	KCNJ4	22	protein_coding	38822332	38851205	317.604	-0.527748	0.143597	-3.67521	0.000237654	0.00812902
NAc	ENSG00000168350	DEGS2	14	protein_coding	100612756	100626500	49.6592	-0.598258	0.157213	-3.80539	0.000141582	0.00567461
NAc	ENSG00000168404	MLKL	16	protein_coding	74705753	74734688	64.6455	0.867396	0.299805	2.8932	0.0038134	0.0477004
NAc	ENSG00000168811	IL12A	3	protein_coding	159706537	159713799	22.7827	0.869961	0.326248	2.66656	0.00766314	0.0731258
NAc	ENSG00000168993	CPLX1	4	protein_coding	778745	819986	343.328	-0.857992	0.181828	-4.71871	2.37344e-06	0.000341417
NAc	ENSG00000169228	RAB24	5	protein_coding	176728199	176730734	41.0252	-0.629492	0.12654	-4.97465	6.53647e-07	0.000129508
NAc	ENSG00000169242	EFNA1	1	protein_coding	155099936	155107333	219.397	0.633223	0.19097	3.31583	0.000913722	0.0194311
NAc	ENSG00000169504	CLIC4	1	protein_coding	25071848	25170815	2638.46	0.616615	0.181779	3.39212	0.000693552	0.0163572
NAc	ENSG00000169683	LRRC45	17	protein_coding	79981178	79989027	63.6291	-0.564562	0.134924	-4.18431	2.86036e-05	0.00192785
NAc	ENSG00000169783	LINGO1	15	protein_coding	77905369	77924832	219.564	-0.680348	0.245807	-2.76782	0.00564328	0.0606242
NAc	ENSG00000169908	TM4SF1	3	protein_coding	149086809	149095652	257.53	1.28672	0.290798	4.42478	9.65414e-06	0.000943053
NAc	ENSG00000169962	TAS1R3	1	protein_coding	1266694	1270686	21.1599	-0.70489	0.185712	-3.79561	0.000147282	0.00578171
NAc	ENSG00000169972	PUSL1	1	protein_coding	1243947	1247057	41.2324	-0.682088	0.176698	-3.86019	0.000113299	0.00491965
NAc	ENSG00000170180	GYPA	4	protein_coding	145030457	145061904	18.1334	0.544294	0.215443	2.52639	0.0115241	0.0924831
NAc	ENSG00000170289	CNGB3	8	protein_coding	87566205	87591434	24.8221	0.723353	0.246888	2.92988	0.00339088	0.0445954
NAc	ENSG00000170379	FAM115C	7	protein_coding	143318043	143422176	123.246	1.01169	0.364674	2.77422	0.00553338	0.06009
NAc	ENSG00000170458	CD14	5	protein_coding	140011313	140013286	144.86	1.13708	0.246652	4.61004	4.02594e-06	0.00049737
NAc	ENSG00000170604	IRF2BP1	19	protein_coding	46386866	46389376	128.295	-0.562568	0.105772	-5.31869	1.04515e-07	3.51451e-05
NAc	ENSG00000170638	TRABD	22	protein_coding	50624344	50637993	119.35	-0.51757	0.13713	-3.77432	0.000160448	0.00615699
NAc	ENSG00000170848	PSG6	19	protein_coding	43406231	43422010	39.4755	0.571201	0.184585	3.0945	0.00197142	0.0314858
NAc	ENSG00000170961	HAS2	8	protein_coding	122624356	122653630	43.6328	0.821131	0.279558	2.93725	0.00331133	0.04396
NAc	ENSG00000171045	TSNARE1	8	protein_coding	143293441	143484601	161.699	-0.554927	0.130953	-4.23761	2.2591e-05	0.00168845
NAc	ENSG00000171051	FPR1	19	protein_coding	52248425	52255146	92.5169	1.80309	0.413201	4.36372	1.27869e-05	0.00118853
NAc	ENSG00000171159	C9orf16	9	protein_coding	130922539	130926207	210.755	-0.54033	0.109369	-4.94043	7.79486e-07	0.000148825
NAc	ENSG00000171222	SCAND1	20	protein_coding	34541539	34542548	88.1112	-0.735739	0.151155	-4.86745	1.13045e-06	0.00019951
NAc	ENSG00000171450	CDK5R2	2	protein_coding	219824377	219826876	100.121	-0.810029	0.247859	-3.26811	0.00108269	0.0216146
NAc	ENSG00000171621	SPSB1	1	protein_coding	9352939	9429591	136.697	0.649603	0.182157	3.56616	0.000362249	0.0106614
NAc	ENSG00000171680	PLEKHG5	1	protein_coding	6526152	6537648	381.678	-0.508995	0.159634	-3.18851	0.00143007	0.0257464
NAc	ENSG00000171798	KNDC1	10	protein_coding	134973951	135039916	714.112	-0.805018	0.200625	-4.01255	6.00665e-05	0.00325133
NAc	ENSG00000171811	TTC40	10	protein_coding	134621896	134756089	238.874	-0.578744	0.221673	-2.6108	0.00903294	0.0800334
NAc	ENSG00000171813	PWWP2B	10	protein_coding	134210672	134231367	148.906	-0.867322	0.12021	-7.21507	5.39075e-13	2.26433e-09
NAc	ENSG00000172247	C1QTNF4	11	protein_coding	47611216	47616211	156.378	-0.952634	0.18767	-5.07611	3.85248e-07	9.00562e-05
NAc	ENSG00000172346	CSDC2	22	protein_coding	41956767	41972670	234.438	-0.575246	0.164694	-3.49282	0.000477941	0.0128802
NAc	ENSG00000172366	FAM195A	16	protein_coding	691813	698474	103.207	-0.579257	0.103813	-5.5798	2.40792e-08	1.2967e-05
NAc	ENSG00000172687	ZNF738	19	protein_coding	21541732	21562102	92.5348	0.557977	0.171826	3.24734	0.00116487	0.0227282
NAc	ENSG00000173153	ESRRA	11	protein_coding	64073044	64084210	164.403	-0.552513	0.0885828	-6.23725	4.45338e-10	6.68071e-07
NAc	ENSG00000173221	GLRX	5	protein_coding	95087023	95158430	225.77	0.860759	0.28179	3.05461	0.00225352	0.0343651
NAc	ENSG00000173281	PPP1R3B	8	protein_coding	8993765	9008206	123.229	0.796798	0.200601	3.97206	7.12532e-05	0.00369496
NAc	ENSG00000173369	C1QB	1	protein_coding	22979255	22987583	247.69	0.588999	0.236737	2.48799	0.0128469	0.0986868
NAc	ENSG00000173530	TNFRSF10D	8	protein_coding	22993101	23021543	51.0707	1.28032	0.334108	3.83207	0.000127068	0.00533249
NAc	ENSG00000173559	NABP1	2	protein_coding	192542794	192547213	168.781	0.55538	0.162198	3.42409	0.000616867	0.0152238
NAc	ENSG00000173621	LRFN4	11	protein_coding	66624118	66625261	74.7424	-1.04582	0.158354	-6.60434	3.99293e-11	8.38595e-08
NAc	ENSG00000173638	SLC19A1	21	protein_coding	46913486	46951455	115.295	-0.523178	0.157691	-3.31775	0.000907463	0.0193292
NAc	ENSG00000173991	TCAP	17	protein_coding	37820440	37822808	45.7626	-0.529027	0.192683	-2.74558	0.00604042	0.0630521
NAc	ENSG00000174175	SELP	1	protein_coding	169558087	169588457	59.7659	0.784566	0.229378	3.42041	0.000625261	0.0153229
NAc	ENSG00000174276	ZNHIT2	11	protein_coding	64884072	64885145	30.3285	-0.648398	0.164753	-3.93558	8.2995e-05	0.00409169
NAc	ENSG00000174332	GLIS1	1	protein_coding	53971910	54199877	35.5937	-0.531651	0.186862	-2.84515	0.00443901	0.0526118
NAc	ENSG00000174586	ZNF497	19	protein_coding	58865723	58874120	41.4205	-0.505274	0.151305	-3.33944	0.00083946	0.0183933
NAc	ENSG00000174680	GRIK1-AS1	21	antisense	31120494	31135999	19.4623	-0.569041	0.197949	-2.87468	0.00404434	0.0495851
NAc	ENSG00000175221	MED16	19	protein_coding	867962	893218	196.403	-0.531778	0.146354	-3.63351	0.000279594	0.00892124
NAc	ENSG00000175264	CHST1	11	protein_coding	45670427	45687172	290.084	-0.556764	0.14851	-3.74901	0.000177537	0.00658767
NAc	ENSG00000175602	CCDC85B	11	protein_coding	65657875	65659105	134.709	-1.27639	0.173474	-7.35785	1.86902e-13	1.30844e-09
NAc	ENSG00000175676	GOLGA8EP	15	pseudogene	23435096	23448420	24.2435	0.636424	0.228926	2.78004	0.00543519	0.0596394
NAc	ENSG00000175745	NR2F1	5	protein_coding	92919043	92930321	200.557	-0.585694	0.171439	-3.41634	0.000634685	0.0154457
NAc	ENSG00000175920	DOK7	4	protein_coding	3465038	3478270	27.5385	-1.0538	0.274853	-3.83404	0.000126057	0.00532684
NAc	ENSG00000176907	C8orf4	8	protein_coding	40010989	40012821	69.9523	1.15751	0.33412	3.46436	0.000531499	0.0137301
NAc	ENSG00000176974	SHMT1	17	protein_coding	18231187	18244969	157.246	0.537503	0.143337	3.74992	0.000176891	0.00658699
NAc	ENSG00000177283	FZD8	10	protein_coding	35927177	35930362	49.4537	-0.624396	0.174738	-3.57334	0.000352462	0.0104406
NAc	ENSG00000177576	C18orf32	18	protein_coding	47008028	47013622	18.0648	-0.815015	0.184594	-4.41518	1.00927e-05	0.000981326
NAc	ENSG00000177685	EFCAB4A	11	protein_coding	826144	828711	30.4746	-0.766426	0.166605	-4.60025	4.21979e-06	0.000518269
NAc	ENSG00000177943	MAMDC4	9	protein_coding	139745395	139755249	118.06	-0.564647	0.174635	-3.23329	0.00122371	0.0234696
NAc	ENSG00000178531	CTXN1	19	protein_coding	7989372	7991051	247.455	-0.901187	0.205091	-4.39408	1.1124e-05	0.00106679
NAc	ENSG00000178726	THBD	20	protein_coding	23026270	23030378	62.0975	1.20262	0.40865	2.94291	0.00325144	0.043524
NAc	ENSG00000178814	OPLAH	8	protein_coding	145106167	145115606	80.9989	-0.559378	0.176246	-3.17384	0.00150435	0.0266016
NAc	ENSG00000178878	APOLD1	12	protein_coding	12878851	12967133	1198.88	1.07156	0.392521	2.72994	0.00633455	0.06496
NAc	ENSG00000179588	ZFPM1	16	protein_coding	88519725	88603424	49.7837	-0.759455	0.24135	-3.14669	0.00165129	0.0280066
NAc	ENSG00000179611	DGKZP1	13	pseudogene	44542560	44545335	109.21	-0.551124	0.150296	-3.66692	0.000245491	0.00833794
NAc	ENSG00000179673	RPRML	17	protein_coding	45055523	45056614	44.4213	-0.571419	0.180286	-3.16951	0.00152694	0.0267214
NAc	ENSG00000179886	TIGD5	8	protein_coding	144680074	144682485	39.9913	-0.59495	0.126706	-4.69553	2.65919e-06	0.000365022
NAc	ENSG00000179954	SSC5D	19	protein_coding	55999771	56000939	24.3788	-0.941464	0.233783	-4.02708	5.64739e-05	0.00310488
NAc	ENSG00000180353	HCLS1	3	protein_coding	121350246	121379758	141.39	0.686071	0.201504	3.40475	0.000662243	0.0158759
NAc	ENSG00000180900	SCRIB	8	protein_coding	144873090	144897549	300.845	-0.798548	0.159967	-4.99194	5.97761e-07	0.00012308
NAc	ENSG00000180921	FAM83H	8	protein_coding	144806103	144815971	36.2715	-0.559685	0.186029	-3.0086	0.00262457	0.0377542
NAc	ENSG00000181218	HIST3H2A	1	protein_coding	228645065	228645560	47.2054	-0.604587	0.146374	-4.13041	3.62111e-05	0.00223678
NAc	ENSG00000181790	BAI1	8	protein_coding	143530791	143626370	561.255	-0.850827	0.223707	-3.8033	0.00014278	0.00567908
NAc	ENSG00000182095	TNRC18	7	protein_coding	5346421	5463177	770.762	-0.728137	0.177385	-4.10485	4.0458e-05	0.00244166
NAc	ENSG00000182154	MRPL41	9	protein_coding	140445651	140447007	181.371	-0.694759	0.143181	-4.8523	1.22036e-06	0.000213584
NAc	ENSG00000182240	BACE2	21	protein_coding	42539728	42648524	100.323	0.604673	0.208443	2.90091	0.00372084	0.0468777
NAc	ENSG00000182272	B4GALNT4	11	protein_coding	369796	372807	447.079	-0.589324	0.129571	-4.54828	5.40854e-06	0.000624122
NAc	ENSG00000182580	EPHB3	3	protein_coding	184279572	184300197	50.6137	-0.755108	0.197781	-3.8179	0.000134591	0.00552084
NAc	ENSG00000182718	ANXA2	15	protein_coding	60639333	60690185	300.38	0.706618	0.228635	3.0906	0.00199755	0.0317102
NAc	ENSG00000182809	CRIP2	14	protein_coding	105939299	105946031	482.362	-0.502844	0.106189	-4.73539	2.18636e-06	0.000317619
NAc	ENSG00000182871	COL18A1	21	protein_coding	46825052	46933634	182.58	-0.56069	0.203397	-2.75664	0.00583995	0.061851
NAc	ENSG00000183092	BEGAIN	14	protein_coding	101003486	101036131	231.364	-0.58257	0.141443	-4.11876	3.80912e-05	0.00233234
NAc	ENSG00000183134	PTGDR2	11	protein_coding	60618413	60623444	31.1041	-0.796406	0.243566	-3.26978	0.00107632	0.0215901
NAc	ENSG00000183186	C2CD4C	19	protein_coding	405438	409139	62.0765	-0.797592	0.254629	-3.13237	0.00173401	0.0290643
NAc	ENSG00000183260	ABHD16B	20	protein_coding	62492566	62494341	21.3999	-0.675185	0.187752	-3.59616	0.000322954	0.00983084
NAc	ENSG00000183397	C19orf71	19	protein_coding	3539152	3544028	36.2152	-0.545448	0.19985	-2.72928	0.00634724	0.0650585
NAc	ENSG00000183629	GOLGA8G	15	protein_coding	28764757	28778117	31.7104	0.570473	0.224678	2.53907	0.0111147	0.0903699
NAc	ENSG00000183779	ZNF703	8	protein_coding	37553269	37557537	34.1156	-0.795596	0.226855	-3.50706	0.000453087	0.0124064
NAc	ENSG00000183798	EMILIN3	20	protein_coding	39988606	39995467	25.1015	-0.603738	0.230866	-2.6151	0.00892011	0.0794825
NAc	ENSG00000183960	KCNH8	3	protein_coding	19189946	19577138	605.674	0.548856	0.17935	3.06025	0.0022115	0.0338774
NAc	ENSG00000184160	ADRA2C	4	protein_coding	3768075	3770218	124.943	-0.595773	0.121613	-4.89892	9.63646e-07	0.000176959
NAc	ENSG00000184221	OLIG1	21	protein_coding	34442450	34444726	365.145	-0.502475	0.159184	-3.15657	0.00159636	0.0274072
NAc	ENSG00000184524	CEND1	11	protein_coding	787104	790123	567.362	-0.648293	0.125706	-5.15721	2.50662e-07	6.5805e-05
NAc	ENSG00000184557	SOCS3	17	protein_coding	76352864	76356158	274.169	2.90806	0.682294	4.26218	2.02442e-05	0.00158588
NAc	ENSG00000184916	JAG2	14	protein_coding	105607318	105635161	158.7	-0.842345	0.166363	-5.06329	4.12081e-07	9.40709e-05
NAc	ENSG00000184986	TMEM121	14	protein_coding	105992940	105996539	49.742	-1.20111	0.164744	-7.29075	3.08233e-13	1.61838e-09
NAc	ENSG00000185022	MAFF	22	protein_coding	38597889	38612518	77.5521	1.48433	0.415876	3.56917	0.000358114	0.0105931
NAc	ENSG00000185133	INPP5J	22	protein_coding	31518717	31520867	62.1808	-0.551785	0.221076	-2.49591	0.0125635	0.0976173
NAc	ENSG00000185340	GAS2L1	22	protein_coding	29702572	29708774	217.711	-0.676194	0.125918	-5.37012	7.86834e-08	3.01528e-05
NAc	ENSG00000185347	C14orf80	14	protein_coding	105956192	105965912	65.4985	-0.592727	0.122867	-4.82415	1.40604e-06	0.000232516
NAc	ENSG00000185551	NR2F2	15	protein_coding	96869167	96881847	69.3964	-0.581423	0.233552	-2.48947	0.0127932	0.0985409
NAc	ENSG00000185614	FAM212A	3	protein_coding	49840687	49842463	22.1584	-0.533597	0.160225	-3.3303	0.000867524	0.0187446
NAc	ENSG00000185668	POU3F1	1	protein_coding	38509523	38512450	51.9076	-0.635946	0.218747	-2.90723	0.00364648	0.046274
NAc	ENSG00000185669	SNAI3	16	protein_coding	88744090	88752901	91.7253	-0.608963	0.181075	-3.36304	0.000770903	0.0174467
NAc	ENSG00000185761	ADAMTSL5	19	protein_coding	1505023	1513188	18.792	-0.517231	0.199128	-2.59748	0.00939094	0.0821443
NAc	ENSG00000185818	NAT8L	4	protein_coding	2061539	2070816	1570.61	-0.564651	0.117589	-4.80188	1.57182e-06	0.000248206
NAc	ENSG00000185838	GNB1L	22	protein_coding	19770747	19842462	40.6244	-0.54643	0.168587	-3.24123	0.00119015	0.0230373
NAc	ENSG00000185885	IFITM1	11	protein_coding	313506	315272	107.19	0.549442	0.213969	2.56786	0.0102329	0.0859302
NAc	ENSG00000185915	KLHL34	X	protein_coding	21673609	21676448	23.3044	-0.783118	0.218112	-3.59044	0.000330114	0.0099613
NAc	ENSG00000185924	RTN4RL1	17	protein_coding	1837971	1928639	71.3116	-0.558567	0.172943	-3.22977	0.00123891	0.0236327
NAc	ENSG00000185988	PLK5	19	protein_coding	1524073	1535455	17.4243	-0.727556	0.262203	-2.77478	0.00552389	0.06009
NAc	ENSG00000186105	LRRC70	5	protein_coding	61874562	61877275	21.9584	0.706799	0.156149	4.52644	5.9985e-06	0.000679323
NAc	ENSG00000186111	PIP5K1C	19	protein_coding	3630181	3700477	490.374	-0.758808	0.238083	-3.18716	0.00143678	0.0257908
NAc	ENSG00000186174	BCL9L	11	protein_coding	118764584	118781613	144.969	-0.698317	0.249759	-2.79596	0.00517463	0.0579614
NAc	ENSG00000186350	RXRA	9	protein_coding	137208944	137298240	554.32	-0.511312	0.13967	-3.66085	0.000251378	0.00842017
NAc	ENSG00000186603	HPDL	1	protein_coding	45792545	45794347	19.562	-0.565482	0.227541	-2.48519	0.0129482	0.099067
NAc	ENSG00000186654	PRR5	22	protein_coding	45064593	45132789	62.8351	-0.669042	0.142277	-4.70239	2.57136e-06	0.000359108
NAc	ENSG00000187193	MT1X	16	protein_coding	56716336	56718108	268.285	1.41852	0.40891	3.46902	0.000522355	0.0135622
NAc	ENSG00000187244	BCAM	19	protein_coding	45312328	45323852	56.3948	-0.777217	0.155445	-4.99997	5.73403e-07	0.000119751
NAc	ENSG00000187260	WDR86	7	protein_coding	151072995	151093003	54.8264	-0.566871	0.190876	-2.96984	0.00297956	0.041007
NAc	ENSG00000187479	C11orf96	11	protein_coding	43964055	43965888	129.21	1.2351	0.40328	3.06263	0.00219398	0.0337074
NAc	ENSG00000187498	COL4A1	13	protein_coding	110801318	110959496	484.12	0.853256	0.293244	2.90972	0.00361758	0.0461583
NAc	ENSG00000187608	ISG15	1	protein_coding	948803	949920	59.8021	-0.506097	0.203158	-2.49115	0.012733	0.0984601
NAc	ENSG00000187609	EXD3	9	protein_coding	140201348	140261084	120.121	-0.548388	0.169048	-3.24399	0.00117869	0.0228788
NAc	ENSG00000187634	SAMD11	1	protein_coding	860260	874671	23.3389	-0.799682	0.244161	-3.27522	0.0010558	0.0213005
NAc	ENSG00000187796	CARD9	9	protein_coding	139256355	139268096	45.4512	-0.711911	0.179491	-3.96628	7.3003e-05	0.0037671
NAc	ENSG00000187952	HS6ST1P1	1	pseudogene	21754796	21756029	45.0627	-1.04878	0.196729	-5.33109	9.76275e-08	3.36127e-05
NAc	ENSG00000187961	KLHL17	1	protein_coding	895967	901095	35.9177	-0.851121	0.176911	-4.81101	1.50167e-06	0.000240748
NAc	ENSG00000188157	AGRN	1	protein_coding	955503	991496	368.501	-0.769574	0.228013	-3.37513	0.000737796	0.0170277
NAc	ENSG00000188290	HES4	1	protein_coding	934342	935552	54.5167	-0.73473	0.188399	-3.89987	9.62452e-05	0.00444583
NAc	ENSG00000188313	PLSCR1	3	protein_coding	146232967	146262651	390.146	0.920329	0.212698	4.32693	1.51205e-05	0.0013456
NAc	ENSG00000188375	H3F3C	12	protein_coding	31944123	31945175	29.3908	0.681598	0.198056	3.44144	0.000578628	0.0145363
NAc	ENSG00000188404	SELL	1	protein_coding	169659808	169680839	54.8767	0.503089	0.172361	2.91881	0.00351372	0.0454639
NAc	ENSG00000188687	SLC4A5	2	protein_coding	74443369	74566839	25.8944	0.763806	0.17677	4.3209	1.55391e-05	0.00136536
NAc	ENSG00000188747	NOXA1	9	protein_coding	140317802	140328858	134.092	-0.755641	0.166137	-4.54831	5.40775e-06	0.000624122
NAc	ENSG00000188993	LRRC66	4	protein_coding	52859868	52883786	31.2286	-0.503144	0.167132	-3.01045	0.00260858	0.0375758
NAc	ENSG00000189067	LITAF	16	protein_coding	11641853	11681419	486.487	0.54846	0.133127	4.11982	3.79175e-05	0.00232849
NAc	ENSG00000189420	ZFP92	X	protein_coding	152683780	152687087	17.5601	-0.508013	0.200325	-2.53594	0.0112147	0.0908752
NAc	ENSG00000196083	IL1RAP	3	protein_coding	190231840	190369308	329.547	0.611726	0.166535	3.67326	0.00023948	0.00816485
NAc	ENSG00000196352	CD55	1	protein_coding	207494853	207534311	309.704	0.558583	0.205223	2.72184	0.00649198	0.0659625
NAc	ENSG00000196498	NCOR2	12	protein_coding	124808961	124979798	740.82	-0.623557	0.246044	-2.53433	0.0112662	0.0911098
NAc	ENSG00000196557	CACNA1H	16	protein_coding	1203241	1271768	628.546	-0.643091	0.189305	-3.39712	0.000681002	0.0161427
NAc	ENSG00000196843	ARID5A	2	protein_coding	97202480	97216022	98.3645	0.81639	0.319806	2.55277	0.010687	0.0882262
NAc	ENSG00000196923	PDLIM7	5	protein_coding	176910395	176924562	91.2703	-0.513871	0.164373	-3.12625	0.00177053	0.0295585
NAc	ENSG00000196954	CASP4	11	protein_coding	104813593	104819621	73.085	0.864343	0.237927	3.63281	0.000280355	0.00892124
NAc	ENSG00000197114	ZGPAT	20	protein_coding	62338817	62367493	41.6888	-0.85367	0.147625	-5.78268	7.35217e-09	5.7189e-06
NAc	ENSG00000197249	SERPINA1	14	protein_coding	94843084	94856974	45.8687	1.13951	0.302118	3.77172	0.000162126	0.00619086
NAc	ENSG00000197405	C5AR1	19	protein_coding	47793280	47811011	24.1453	0.787499	0.271716	2.89824	0.00375262	0.0471931
NAc	ENSG00000197530	MIB2	1	protein_coding	1550795	1565985	348.42	-0.772642	0.156059	-4.95096	7.38473e-07	0.000144948
NAc	ENSG00000197599	CCDC154	16	protein_coding	1484384	1487904	28.6049	-1.01454	0.328054	-3.09259	0.0019842	0.0316178
NAc	ENSG00000197774	EME2	16	protein_coding	1823208	1826312	180.483	-0.569869	0.147415	-3.86574	0.000110753	0.004856
NAc	ENSG00000197785	ATAD3A	1	protein_coding	1447531	1470065	158.045	-0.509712	0.112142	-4.54523	5.48758e-06	0.000629782
NAc	ENSG00000197859	ADAMTSL2	9	protein_coding	136397286	136440641	150.265	-0.546362	0.164303	-3.32532	0.000883162	0.0190238
NAc	ENSG00000198019	FCGR1B	1	protein_coding	120926979	120935937	65.2473	0.825991	0.296152	2.78908	0.00528588	0.0586445
NAc	ENSG00000198342	ZNF442	19	protein_coding	12460185	12476447	74.0186	0.717513	0.183993	3.89969	9.63172e-05	0.00444583
NAc	ENSG00000198569	SLC34A3	9	protein_coding	140125385	140131006	18.8104	-0.610058	0.243336	-2.50706	0.0121742	0.0955463
NAc	ENSG00000198576	ARC	8	protein_coding	143692405	143696833	51.9304	-0.759403	0.306131	-2.48065	0.0131143	0.0996129
NAc	ENSG00000198598	MMP17	12	protein_coding	132312938	132336316	271.87	-0.921483	0.214616	-4.29364	1.75769e-05	0.0014766
NAc	ENSG00000198658	ABHD17AP2	1	pseudogene	146076838	146080009	33.5887	-0.825096	0.197618	-4.17521	2.97707e-05	0.00196618
NAc	ENSG00000198734	F5	1	protein_coding	169483404	169484983	248.92	0.510769	0.173937	2.93652	0.00331913	0.0439928
NAc	ENSG00000198753	PLXNB3	X	protein_coding	153029711	153044796	418.82	-0.543236	0.21067	-2.57861	0.00991994	0.0846217
NAc	ENSG00000198805	PNP	14	protein_coding	20937113	20942730	136.553	0.678578	0.206679	3.28325	0.00102618	0.0208919
NAc	ENSG00000198816	ZNF358	19	protein_coding	7580178	7584637	103.981	-0.589131	0.142238	-4.14188	3.44471e-05	0.00215769
NAc	ENSG00000200434	RNA5-8SP2	16	rRNA	33965426	33965577	548.631	-0.76613	0.265733	-2.88308	0.00393812	0.0486506
NAc	ENSG00000201318	SNORD114-30	14	snoRNA	101458256	101458327	18.6391	-0.690092	0.172124	-4.00927	6.09059e-05	0.00327986
NAc	ENSG00000203485	INF2	14	protein_coding	105155943	105185942	751.879	-0.587688	0.219377	-2.67889	0.0073866	0.0716882
NAc	ENSG00000203710	CR1	1	protein_coding	207669492	207732829	81.095	1.21764	0.380498	3.20011	0.00137376	0.02511
NAc	ENSG00000203721	LINC00862	1	lincRNA	200311672	200342920	20.8655	0.5698	0.203492	2.80011	0.00510853	0.0573127
NAc	ENSG00000203727	SAMD5	6	protein_coding	147830063	147891157	183.918	-0.525584	0.164843	-3.1884	0.00143063	0.0257464
NAc	ENSG00000203747	FCGR3A	1	protein_coding	161511549	161519818	285.708	1.02894	0.283144	3.63397	0.000279094	0.00892124
NAc	ENSG00000203772	SPRN	10	protein_coding	135234170	135238076	118.251	-0.564209	0.154015	-3.66335	0.00024894	0.00839034
NAc	ENSG00000203835	ABHD17AP1	1	pseudogene	147618673	147621845	33.5887	-0.825096	0.197618	-4.17521	2.97707e-05	0.00196618
NAc	ENSG00000203896	LIME1	20	protein_coding	62366815	62369794	32.2699	-0.589928	0.185076	-3.18749	0.00143511	0.0257829
NAc	ENSG00000204099	NEU4	2	protein_coding	242749920	242758739	27.1539	-1.07822	0.213757	-5.04412	4.55619e-07	0.000101797
NAc	ENSG00000204103	MAFB	20	protein_coding	39314488	39317880	45.2692	0.660745	0.21692	3.04603	0.00231882	0.0349177
NAc	ENSG00000204176	SYT15	10	protein_coding	46955444	46967446	383.411	-0.508244	0.169636	-2.99609	0.0027347	0.0388864
NAc	ENSG00000204347	BTBD17	17	protein_coding	72352555	72358085	16.3768	-0.732871	0.203915	-3.594	0.000325634	0.00985442
NAc	ENSG00000204851	PNMAL2	19	protein_coding	46990163	46999136	483.155	-0.522571	0.110322	-4.73678	2.17146e-06	0.000317619
NAc	ENSG00000205090	TMEM240	1	protein_coding	1470554	1475737	63.1919	-0.505421	0.111871	-4.51787	6.24648e-06	0.000690467
NAc	ENSG00000205364	MT1M	16	protein_coding	56666145	56667898	238.825	1.27798	0.370557	3.4488	0.000563088	0.0142653
NAc	ENSG00000205488	CALML3-AS1	10	antisense	5556207	5565140	19.3822	-0.616969	0.202158	-3.05191	0.00227389	0.0344811
NAc	ENSG00000205903	ZNF316	7	pseudogene	6676953	6692595	134.85	-0.600512	0.10712	-5.60598	2.07078e-08	1.17542e-05
NAc	ENSG00000207697	MIR573	4	miRNA	24521815	24521913	17.7619	0.515641	0.198992	2.59127	0.00956227	0.0830206
NAc	ENSG00000211689	TRGC1	7	TR_C_gene	38297480	38305279	18.3632	-0.640566	0.257665	-2.48604	0.0129174	0.0989388
NAc	ENSG00000212864	RNF208	9	protein_coding	140114707	140116033	39.5696	-0.982264	0.307122	-3.19829	0.00138246	0.0251646
NAc	ENSG00000213881	NPM1P6	8	pseudogene	62114909	62115779	28.8387	0.553075	0.202416	2.73237	0.00628801	0.0645774
NAc	ENSG00000214063	TSPAN4	11	protein_coding	842808	867111	84.8359	-0.602419	0.148817	-4.04805	5.16469e-05	0.00291583
NAc	ENSG00000214182	PTMAP5	13	pseudogene	82264046	82265207	50.2327	0.612314	0.190945	3.20676	0.00134239	0.0248614
NAc	ENSG00000214309	MBLAC1	7	protein_coding	99724317	99726118	26.3239	-0.518301	0.140561	-3.68738	0.000226576	0.00782859
NAc	ENSG00000215483	LINC00598	13	lincRNA	41025131	41055143	22.6587	0.570643	0.177361	3.21741	0.00129355	0.0243433
NAc	ENSG00000216866	RPS2P55	X	pseudogene	40794235	40795117	15.6451	-0.555717	0.169186	-3.28466	0.00102107	0.0208808
NAc	ENSG00000218052	ADAMTS7P4	15	pseudogene	85798600	85814123	27.394	-0.605301	0.197513	-3.06461	0.00217952	0.0336328
NAc	ENSG00000218891	ZNF579	19	protein_coding	56088899	56092187	27.5963	-0.67078	0.175786	-3.8159	0.000135689	0.00555505
NAc	ENSG00000219607	PPP1R3G	6	protein_coding	5085720	5087455	44.5442	-0.625365	0.211885	-2.95143	0.00316302	0.0427327
NAc	ENSG00000220008	LINGO3	19	protein_coding	2289783	2292023	121.052	-0.99344	0.252243	-3.93842	8.20209e-05	0.00406274
NAc	ENSG00000221963	APOL6	22	protein_coding	36044442	36064456	475.276	0.613351	0.200609	3.05744	0.00223236	0.0341223
NAc	ENSG00000223403	MEG9	14	lincRNA	101536248	101539271	53.7618	-0.533475	0.186393	-2.86211	0.00420837	0.0509125
NAc	ENSG00000224051	GLTPD1	1	protein_coding	1260136	1263374	80.5526	-0.596974	0.14252	-4.18871	2.80539e-05	0.00191918
NAc	ENSG00000225108	ZBTB45P1	2	pseudogene	110744516	110745971	21.7071	-0.600909	0.211828	-2.83678	0.00455713	0.0534387
NAc	ENSG00000225449	RAB6C-AS1	2	pseudogene	130724165	130738039	34.1064	0.589552	0.212533	2.77393	0.00553843	0.06009
NAc	ENSG00000225614	ZNF469	16	protein_coding	88493879	88507157	109.734	-0.724508	0.171942	-4.21367	2.51258e-05	0.00177674
NAc	ENSG00000226065	ZBTB45P2	2	pseudogene	111140689	111142219	100.566	-0.63993	0.191558	-3.34066	0.000835785	0.0183803
NAc	ENSG00000226981	ABHD17AP6	17	pseudogene	20717933	20747570	30.124	-1.13466	0.23307	-4.86831	1.12556e-06	0.00019951
NAc	ENSG00000227195	MIR663A	20	processed_transcript	26167556	26168177	3722.07	-2.02983	0.448963	-4.52116	6.15031e-06	0.000683432
NAc	ENSG00000227473	TSSK5P1	8	pseudogene	145196117	145198567	25.2286	-0.641475	0.180901	-3.546	0.000391123	0.0111386
NAc	ENSG00000227500	SCAMP4	19	protein_coding	1905213	1926016	172.553	-0.501527	0.156144	-3.21194	0.0013184	0.0246124
NAc	ENSG00000228300	C19orf24	19	protein_coding	1275026	1279227	57.0582	-0.640865	0.119581	-5.35928	8.35565e-08	3.02561e-05
NAc	ENSG00000228544	CCDC183-AS1	9	antisense	139698379	139703300	31.2293	-0.607033	0.16835	-3.60578	0.000311217	0.00961203
NAc	ENSG00000228672	PROB1	5	protein_coding	138727635	138730885	19.4316	-0.782064	0.255273	-3.06364	0.00218661	0.0336682
NAc	ENSG00000229644	NAMPTL	10	protein_coding	36810649	36813162	279.561	1.08216	0.226994	4.76733	1.8668e-06	0.000284106
NAc	ENSG00000230366	DSCR9	21	lincRNA	38580804	38592989	23.3279	-0.536463	0.193503	-2.77238	0.00556476	0.0601808
NAc	ENSG00000230567	FAM203B	8	protein_coding	145437880	145440828	85.8468	-0.542737	0.108152	-5.01825	5.2143e-07	0.000111746
NAc	ENSG00000230778	ANKRD63	15	protein_coding	40573645	40574787	42.5072	-1.34163	0.267899	-5.00795	5.50119e-07	0.000116703
NAc	ENSG00000230903	RPL9P8	15	pseudogene	83041055	83041633	1422.58	0.53653	0.164621	3.25918	0.00111733	0.0220754
NAc	ENSG00000231165	TRBV26OR9-2	9	IG_V_pseudogene	33695765	33696057	18.7371	-0.596134	0.185041	-3.22163	0.00127462	0.0241603
NAc	ENSG00000231738	TSPAN19	12	protein_coding	85408094	85411374	34.7613	0.594459	0.211948	2.80474	0.00503574	0.05686
NAc	ENSG00000232434	C9orf172	9	protein_coding	139738867	139741797	57.0606	-1.51402	0.341402	-4.43472	9.21922e-06	0.00092201
NAc	ENSG00000235173	FAM203A	8	protein_coding	145192672	145195746	93.3259	-0.520043	0.100437	-5.17779	2.24535e-07	6.20485e-05
NAc	ENSG00000235717	DPP10-AS2	2	antisense	115591407	115593165	41.961	0.572774	0.225186	2.54356	0.010973	0.0896359
NAc	ENSG00000235750	KIAA0040	1	protein_coding	175126123	175161929	108.505	1.50231	0.38724	3.87955	0.000104652	0.00466645
NAc	ENSG00000236044	FABP5P2	13	pseudogene	52540878	52541285	15.9056	0.525332	0.18743	2.80282	0.00506578	0.0569548
NAc	ENSG00000236700	LINC01010	6	lincRNA	134758854	134825719	34.1199	0.742875	0.217037	3.4228	0.0006198	0.0152757
NAc	ENSG00000236963	LINC01141	1	lincRNA	20687072	20755275	30.1093	-0.698291	0.227613	-3.06788	0.00215583	0.0335137
NAc	ENSG00000237550	UBE2Q2P6	15	pseudogene	82664514	82665092	1420.28	0.537964	0.163371	3.2929	0.000991605	0.0204102
NAc	ENSG00000237906	MUPP	9	pseudogene	115721414	115724541	28.0589	0.907618	0.217102	4.1806	2.90741e-05	0.0019339
NAc	ENSG00000237949	LINC00844	10	lincRNA	60759386	60761303	264.111	0.580296	0.218788	2.65233	0.00799392	0.0746834
NAc	ENSG00000238133	MLK7-AS1	2	antisense	174031174	174072340	14.5355	0.668622	0.173308	3.858	0.000114318	0.00494012
NAc	ENSG00000240165	RN7SL787P	9	misc_RNA	67858947	67859228	22.5077	0.535852	0.20737	2.58403	0.00976532	0.0838476
NAc	ENSG00000241563	CORT	1	protein_coding	10509776	10511959	52.729	-0.502648	0.181053	-2.77625	0.00549898	0.0599363
NAc	ENSG00000241697	TMEFF1	9	protein_coding	103235395	103339918	20.2303	-0.610253	0.180876	-3.37387	0.000741199	0.0170874
NAc	ENSG00000242802	AP5Z1	7	protein_coding	4815253	4831399	189.09	-0.570212	0.12184	-4.68001	2.86855e-06	0.000388099
NAc	ENSG00000243256	RPL30P14	18	pseudogene	59072091	59072438	28.6084	-0.599829	0.190222	-3.15331	0.00161431	0.0275761
NAc	ENSG00000243678	NME1-NME2	17	protein_coding	49242796	49249105	19.5254	-0.521069	0.16206	-3.21529	0.00130313	0.0244797
NAc	ENSG00000244086	RPS20P35	17	pseudogene	37011567	37011923	37.1586	0.546569	0.163135	3.3504	0.000806944	0.0180292
NAc	ENSG00000244257	PKD1P1	16	pseudogene	16404198	16428047	289.408	-0.876254	0.207849	-4.21582	2.48874e-05	0.00177674
NAc	ENSG00000244486	SCARF2	22	protein_coding	20778874	20792112	17.061	-0.598989	0.23351	-2.56515	0.010313	0.0862443
NAc	ENSG00000245532	NEAT1	11	lincRNA	65190245	65192232	10188.4	0.688378	0.262233	2.62506	0.00866343	0.0783434
NAc	ENSG00000247095	MIR210HG	11	lincRNA	565660	568420	29.1606	0.967643	0.382571	2.52931	0.0114286	0.0919629
NAc	ENSG00000248257	PSG10P	19	pseudogene	43343520	43359870	27.5346	0.588995	0.165099	3.56753	0.000360365	0.0106429
NAc	ENSG00000250067	YJEFN3	19	protein_coding	19639670	19648389	165.523	-0.512909	0.170495	-3.00836	0.00262664	0.0377582
NAc	ENSG00000250120	PCDHA10	5	protein_coding	140235595	140391213	64.0951	-0.908801	0.289973	-3.13409	0.0017239	0.0289179
NAc	ENSG00000250251	PKD1P6	16	pseudogene	15219099	15248421	481.61	-0.833691	0.217111	-3.83993	0.000123067	0.00522152
NAc	ENSG00000250571	GLI4	8	protein_coding	144349603	144355553	70.3131	-0.610172	0.131827	-4.62857	3.682e-06	0.00046305
NAc	ENSG00000251322	SHANK3	22	protein_coding	51112843	51171726	967.967	-0.601631	0.186301	-3.22934	0.00124075	0.0236362
NAc	ENSG00000251372	LINC00499	4	lincRNA	139230865	139234874	38.7102	-1.13387	0.317227	-3.57431	0.000351156	0.0104406
NAc	ENSG00000253193	FCGR1C	1	pseudogene	149369328	149370551	76.2385	0.75539	0.288806	2.61556	0.00890803	0.0794825
NAc	ENSG00000253733	LZTS1-AS1	8	lincRNA	20133284	20147969	26.0176	-0.785638	0.246094	-3.19243	0.00141082	0.0255211
NAc	ENSG00000254656	RTL1	14	protein_coding	101346992	101351184	136.073	-0.502459	0.188513	-2.66538	0.00769016	0.0732466
NAc	ENSG00000254681	PKD1P5	16	pseudogene	18468378	18495797	1018.25	-0.920732	0.24563	-3.74846	0.000177924	0.0065904
NAc	ENSG00000255414	LINC01059	11	lincRNA	123325106	123331118	21.133	-0.773921	0.234101	-3.30593	0.000946609	0.0198015
NAc	ENSG00000256463	SALL3	18	protein_coding	76740275	76757322	87.6084	-0.795338	0.18715	-4.24973	2.14033e-05	0.00162867
NAc	ENSG00000257242	C12orf79	12	protein_coding	92378756	92535489	21.8024	0.64519	0.252581	2.55439	0.0106374	0.0879963
NAc	ENSG00000258667	HIF1A-AS2	14	lincRNA	62182276	62217815	40.8291	0.628712	0.207205	3.03425	0.00241138	0.0357082
NAc	ENSG00000258861	MIR381HG	14	lincRNA	101511494	101518132	20.3924	-0.577702	0.227727	-2.53682	0.0111864	0.0907446
NAc	ENSG00000258986	TMEM179	14	protein_coding	104941015	105071096	288.212	-0.535694	0.110571	-4.84478	1.26751e-06	0.000216425
NAc	ENSG00000259207	ITGB3	17	protein_coding	45331212	45389182	22.1654	1.16082	0.29512	3.93337	8.37623e-05	0.00411023
NAc	ENSG00000260305	NTRK3-AS1	15	lincRNA	88795961	88814297	32.6912	-0.505485	0.168356	-3.00247	0.00267799	0.0383128
NAc	ENSG00000260727	SLC7A5P1	16	pseudogene	29624425	29624961	21.8997	-0.736694	0.258826	-2.84629	0.00442319	0.0524835
NAc	ENSG00000261221	ZNF865	19	protein_coding	56116771	56128635	36.5882	-0.964207	0.245274	-3.93114	8.45441e-05	0.00412929
NAc	ENSG00000261373	VPS9D1-AS1	16	antisense	89778264	89784573	17.1042	-0.572262	0.209183	-2.7357	0.00622472	0.0642416
NAc	ENSG00000263426	RN7SL471P	6	misc_RNA	28945252	28945547	2517.65	-0.912374	0.322502	-2.82905	0.00466861	0.0541714
NAc	ENSG00000263901	RN7SL544P	9	misc_RNA	46674882	46675163	18.2546	0.708455	0.194356	3.64514	0.000267247	0.00876989
NAc	ENSG00000264356	RN7SL763P	9	misc_RNA	42031881	42032162	18.2771	0.7036	0.194528	3.61696	0.000298078	0.00935761
NAc	ENSG00000264462	MIR3648	21	miRNA	9825832	9826011	118.861	-3.04962	0.568039	-5.36869	7.93126e-08	3.01528e-05
NAc	ENSG00000267493	CIRBP-AS1	19	antisense	1268165	1270240	17.7566	-0.5895	0.20119	-2.93006	0.00338897	0.0445954
NAc	ENSG00000267519	MIR24-2	19	lincRNA	13945330	13947103	18.3335	0.710845	0.21058	3.37566	0.00073639	0.0170197
NAc	ENSG00000269699	ZIM2	19	protein_coding	57285920	57352075	62.4256	0.655928	0.172505	3.80238	0.000143315	0.00567908
NAc	ENSG00000269936	MIR145	5	lincRNA	148809849	148812397	51.5596	-0.600472	0.198068	-3.03165	0.0024322	0.0357712
NAc	ENSG00000270066	SCARNA2	1	lincRNA	109642815	109643241	2023.73	-0.706157	0.114371	-6.17428	6.64677e-10	8.72472e-07
NAc	ENSG00000270141	TERC	3	lincRNA	169482308	169482848	91.7513	-1.10003	0.16008	-6.87178	6.34061e-12	1.72878e-08
Midbrain	ENSG00000000938	FGR	1	protein_coding	27938575	27961788	48.4521	0.526323	0.15652	3.36266	0.000771951	0.0768028
Midbrain	ENSG00000007866	TEAD3	6	protein_coding	35441374	35464727	23.774	1.04046	0.235694	4.41446	1.01262e-05	0.00396561
Midbrain	ENSG00000011422	PLAUR	19	protein_coding	44150247	44174318	21.2323	1.03948	0.304988	3.40825	0.000653817	0.0679895
Midbrain	ENSG00000018280	SLC11A1	2	protein_coding	219246752	219260750	76.7039	1.93898	0.418601	4.63204	3.62077e-06	0.00185122
Midbrain	ENSG00000025708	TYMP	22	protein_coding	50964181	50968428	38.381	1.15352	0.332636	3.46781	0.000524716	0.0592511
Midbrain	ENSG00000034152	MAP2K3	17	protein_coding	21187984	21218525	101.639	0.504336	0.146971	3.43153	0.000600185	0.0642268
Midbrain	ENSG00000047457	CP	3	protein_coding	148880197	148939614	104.385	1.36772	0.380343	3.59601	0.000323139	0.0415922
Midbrain	ENSG00000060138	YBX3	12	protein_coding	10851683	10875906	141.843	1.42702	0.285487	4.99853	5.77691e-07	0.000506332
Midbrain	ENSG00000064932	SBNO2	19	protein_coding	1107636	1174282	103.721	0.948674	0.213763	4.43797	9.08122e-06	0.00371442
Midbrain	ENSG00000067182	TNFRSF1A	12	protein_coding	6437923	6451280	189.05	0.728999	0.192135	3.7942	0.000148122	0.0250123
Midbrain	ENSG00000069399	BCL3	19	protein_coding	45250962	45262743	26.7072	1.09259	0.257013	4.25112	2.12708e-05	0.00676558
Midbrain	ENSG00000070404	FSTL3	19	protein_coding	676392	683385	46.6786	0.541531	0.146243	3.70296	0.000213098	0.0316313
Midbrain	ENSG00000075426	FOSL2	2	protein_coding	28615315	28631669	160.387	1.94304	0.323548	6.00543	1.90825e-09	1.75616e-05
Midbrain	ENSG00000077238	IL4R	16	protein_coding	27324989	27356341	99.3968	1.45148	0.298192	4.86761	1.12957e-06	0.000770032
Midbrain	ENSG00000086544	ITPKC	19	protein_coding	41223008	41246765	176.753	1.25138	0.275491	4.54238	5.56226e-06	0.0026251
Midbrain	ENSG00000089159	PXN	12	protein_coding	120648250	120687964	247.275	0.633675	0.148148	4.27732	1.89157e-05	0.00644746
Midbrain	ENSG00000090339	ICAM1	19	protein_coding	10381511	10397291	56.6195	1.07836	0.264657	4.07456	4.61008e-05	0.0111649
Midbrain	ENSG00000090924	PLEKHG2	19	protein_coding	39903225	39916154	24.7362	0.890873	0.238525	3.73492	0.000187773	0.0290433
Midbrain	ENSG00000092607	TBX15	1	protein_coding	119425669	119532179	3.04952	1.23049	0.367225	3.35077	0.000805879	0.078899
Midbrain	ENSG00000096060	FKBP5	6	protein_coding	35541367	35656714	303.566	1.02094	0.308632	3.30796	0.000939784	0.0835249
Midbrain	ENSG00000099860	GADD45B	19	protein_coding	2476120	2476636	508.704	2.02957	0.391708	5.18134	2.20297e-07	0.000311906
Midbrain	ENSG00000100336	APOL4	22	protein_coding	36585172	36600852	24.6201	1.74826	0.473859	3.6894	0.000224781	0.0328359
Midbrain	ENSG00000101187	SLCO4A1	20	protein_coding	61273872	61303645	104.078	1.59212	0.331168	4.8076	1.52755e-06	0.000937203
Midbrain	ENSG00000102265	TIMP1	X	protein_coding	47441712	47446188	105.576	0.557137	0.166938	3.3374	0.000845664	0.0806492
Midbrain	ENSG00000103196	CRISPLD2	16	protein_coding	84853590	84943114	79.3759	1.00619	0.245677	4.09559	4.21089e-05	0.0106448
Midbrain	ENSG00000103710	RASL12	15	protein_coding	65345679	65360450	414.778	0.564577	0.175041	3.2254	0.00125797	0.0989494
Midbrain	ENSG00000104635	SLC39A14	8	protein_coding	22224762	22280198	297.564	0.947539	0.280011	3.38393	0.000714553	0.0714786
Midbrain	ENSG00000105281	SLC1A5	19	protein_coding	47278140	47291851	56.2458	0.962996	0.284502	3.38485	0.000712182	0.0714786
Midbrain	ENSG00000105639	JAK3	19	protein_coding	17935589	17958800	65.7165	0.734079	0.191204	3.83925	0.00012341	0.0220532
Midbrain	ENSG00000105697	HAMP	19	protein_coding	35771619	35776046	58.8046	2.71282	0.558618	4.85631	1.19596e-06	0.000786172
Midbrain	ENSG00000105825	TFPI2	7	protein_coding	93514709	93520303	3.66763	1.70973	0.440147	3.88445	0.00010256	0.0194951
Midbrain	ENSG00000107438	PDLIM1	10	protein_coding	96997329	97050781	18.8469	1.83733	0.341923	5.37351	7.72177e-08	0.000157919
Midbrain	ENSG00000108342	CSF3	17	protein_coding	38171614	38173170	11.0681	4.77589	0.970163	4.92277	8.53282e-07	0.000682848
Midbrain	ENSG00000108691	CCL2	17	protein_coding	32582304	32583835	79.7424	2.64616	0.520051	5.08826	3.61366e-07	0.000391253
Midbrain	ENSG00000109906	ZBTB16	11	protein_coding	113930315	114121398	130.669	0.572165	0.168268	3.40032	0.00067307	0.0695985
Midbrain	ENSG00000111341	MGP	12	protein_coding	15034115	15038860	43.0913	0.886684	0.174662	5.07657	3.84315e-07	0.000392983
Midbrain	ENSG00000111859	NEDD9	6	protein_coding	11183531	11232915	62.0918	0.820596	0.208207	3.94125	8.10596e-05	0.0165776
Midbrain	ENSG00000112715	VEGFA	6	protein_coding	43737921	43746501	443.514	1.01078	0.291631	3.46595	0.000528364	0.0592991
Midbrain	ENSG00000113083	LOX	5	protein_coding	121398890	121413980	9.8463	1.63937	0.43469	3.77136	0.000162359	0.0264458
Midbrain	ENSG00000113368	LMNB1	5	protein_coding	126112315	126172706	18.8102	1.23793	0.304412	4.06664	4.76962e-05	0.0112551
Midbrain	ENSG00000113739	STC2	5	protein_coding	172741716	172756506	29.7817	0.771941	0.237598	3.24893	0.00115838	0.0956109
Midbrain	ENSG00000113916	BCL6	3	protein_coding	187439165	187463515	287.838	0.786172	0.185045	4.24854	2.15172e-05	0.00676558
Midbrain	ENSG00000114737	CISH	3	protein_coding	50643921	50649192	14.9394	2.62915	0.480687	5.46956	4.51148e-08	0.000118626
Midbrain	ENSG00000115594	IL1R1	2	protein_coding	102681004	102781413	49.8999	0.985672	0.270358	3.6458	0.000266561	0.0368896
Midbrain	ENSG00000115602	IL1RL1	2	protein_coding	102927962	102968497	40.1138	4.26352	0.792417	5.3804	7.43222e-08	0.000157919
Midbrain	ENSG00000116717	GADD45A	1	protein_coding	68150744	68154021	112.689	0.862543	0.246691	3.49645	0.000471492	0.0567208
Midbrain	ENSG00000117228	GBP1	1	protein_coding	89518002	89531043	65.579	1.24125	0.357176	3.47517	0.000510526	0.0583648
Midbrain	ENSG00000117525	F3	1	protein_coding	94994781	95007356	317.035	1.00921	0.306698	3.29057	0.000999849	0.0864001
Midbrain	ENSG00000119138	KLF9	9	protein_coding	72999503	73029540	334.218	0.632806	0.18899	3.34836	0.000812922	0.0791674
Midbrain	ENSG00000119630	PGF	14	protein_coding	75408537	75422487	57.1005	1.05932	0.31236	3.39136	0.00069546	0.0707218
Midbrain	ENSG00000120738	EGR1	5	protein_coding	137801179	137805004	96.7919	1.28591	0.376917	3.41166	0.000645688	0.0679116
Midbrain	ENSG00000122863	CHST3	10	protein_coding	73724123	73773322	304.253	0.678075	0.156572	4.33075	1.48601e-05	0.00536303
Midbrain	ENSG00000123374	CDK2	12	protein_coding	56360553	56366568	20.7	1.14744	0.262712	4.36768	1.25573e-05	0.00471692
Midbrain	ENSG00000124762	CDKN1A	6	protein_coding	36644305	36652288	257.083	2.2186	0.419621	5.28714	1.24241e-07	0.000212438
Midbrain	ENSG00000125347	IRF1	5	protein_coding	131817301	131826490	71.2289	1.26663	0.30603	4.13889	3.48995e-05	0.00988246
Midbrain	ENSG00000125538	IL1B	2	protein_coding	113587328	113594480	27.5771	2.13606	0.555988	3.84192	0.000122077	0.0220326
Midbrain	ENSG00000125733	TRIP10	19	protein_coding	6737936	6751511	58.9212	0.903378	0.191612	4.71462	2.42157e-06	0.00139286
Midbrain	ENSG00000125810	CD93	20	protein_coding	23059986	23066977	61.2249	1.23018	0.315515	3.89897	9.66041e-05	0.0189159
Midbrain	ENSG00000126603	GLIS2	16	protein_coding	4364762	4389598	92.5127	0.60976	0.167604	3.63811	0.000274648	0.0373666
Midbrain	ENSG00000127507	EMR2	19	protein_coding	14843205	14889349	20.7849	1.1239	0.312538	3.59605	0.000323083	0.0415922
Midbrain	ENSG00000127954	STEAP4	7	protein_coding	87905744	87936206	4.57788	2.30158	0.494234	4.65686	3.21071e-06	0.00173813
Midbrain	ENSG00000128016	ZFP36	19	protein_coding	39897453	39900052	313.329	1.77421	0.363719	4.87798	1.0718e-06	0.000758754
Midbrain	ENSG00000129450	SIGLEC9	19	protein_coding	51628165	51633567	16.332	1.31834	0.362945	3.63234	0.000280868	0.0377347
Midbrain	ENSG00000130589	HELZ2	20	protein_coding	62189439	62199427	39.9734	0.744706	0.207916	3.58176	0.000341287	0.0433223
Midbrain	ENSG00000131435	PDLIM4	5	protein_coding	131593364	131609147	68.7137	1.07938	0.239443	4.50786	6.54841e-06	0.00301325
Midbrain	ENSG00000131759	RARA	17	protein_coding	38465444	38504588	54.9948	0.637469	0.168938	3.7734	0.000161038	0.0264458
Midbrain	ENSG00000131873	CHSY1	15	protein_coding	101715928	101792137	129.211	0.751742	0.192437	3.90644	9.36663e-05	0.0185379
Midbrain	ENSG00000132510	KDM6B	17	protein_coding	7743222	7748665	74.8524	0.608132	0.174102	3.49295	0.000477709	0.0570955
Midbrain	ENSG00000133392	MYH11	16	protein_coding	15797029	15950868	99.2763	0.520842	0.157432	3.30836	0.000938443	0.0835249
Midbrain	ENSG00000134013	LOXL2	8	protein_coding	23154702	23261753	29.4395	1.66062	0.372514	4.45788	8.27743e-06	0.0034626
Midbrain	ENSG00000134107	BHLHE40	3	protein_coding	5020801	5027008	445.879	0.804303	0.197758	4.06712	4.75986e-05	0.0112551
Midbrain	ENSG00000134470	IL15RA	10	protein_coding	5990855	6002530	11.4859	1.0233	0.25688	3.98358	6.78852e-05	0.014362
Midbrain	ENSG00000134531	EMP1	12	protein_coding	13349650	13369708	201.608	1.44107	0.332045	4.33998	1.42498e-05	0.00524563
Midbrain	ENSG00000134871	COL4A2	13	protein_coding	110958159	111077215	109.068	0.889993	0.235121	3.78525	0.000153553	0.0254622
Midbrain	ENSG00000135063	FAM189A2	9	protein_coding	71944241	72007370	204.853	0.575537	0.176461	3.26154	0.00110807	0.0922858
Midbrain	ENSG00000135094	SDS	12	protein_coding	113830250	113841693	251.066	0.825337	0.22943	3.59734	0.000321486	0.0415922
Midbrain	ENSG00000135245	HILPDA	7	protein_coding	128095903	128097978	264.973	2.46937	0.447612	5.51676	3.45308e-08	0.000105929
Midbrain	ENSG00000136244	IL6	7	protein_coding	22765503	22771621	7.88454	2.92927	0.654224	4.47748	7.55301e-06	0.0032555
Midbrain	ENSG00000136286	MYO1G	7	protein_coding	45002261	45018668	20.4492	2.08478	0.445116	4.68368	2.81765e-06	0.00157157
Midbrain	ENSG00000136997	MYC	8	protein_coding	128747680	128752723	18.8776	1.41467	0.316057	4.476	7.60549e-06	0.0032555
Midbrain	ENSG00000137094	DNAJB5	9	protein_coding	34989638	34998428	152.993	0.584654	0.15745	3.71327	0.000204599	0.0306166
Midbrain	ENSG00000137193	PIM1	6	protein_coding	37137979	37143202	116.214	1.00109	0.227215	4.40593	1.0533e-05	0.00403895
Midbrain	ENSG00000137507	LRRC32	11	protein_coding	76368568	76381791	126.48	0.738363	0.197089	3.74634	0.000179436	0.0279889
Midbrain	ENSG00000137801	THBS1	15	protein_coding	39873280	39874608	39.2535	1.88637	0.375582	5.02252	5.09967e-07	0.000469323
Midbrain	ENSG00000138061	CYP1B1	2	protein_coding	38294116	38297840	37.2891	1.17541	0.262459	4.47844	7.51914e-06	0.0032555
Midbrain	ENSG00000138166	DUSP5	10	protein_coding	112257596	112271302	30.675	1.34861	0.279675	4.82206	1.42081e-06	0.000901772
Midbrain	ENSG00000138587	MNS1	15	protein_coding	56713742	56726405	7.63057	1.03609	0.313028	3.3099	0.000933293	0.0835249
Midbrain	ENSG00000139083	ETV6	12	protein_coding	11802788	12048336	55.2348	0.584005	0.178199	3.27726	0.00104821	0.0892087
Midbrain	ENSG00000139832	RAB20	13	protein_coding	111175417	111214080	27.881	1.0371	0.31613	3.28063	0.00103576	0.0886707
Midbrain	ENSG00000140379	BCL2A1	15	protein_coding	80253231	80263788	4.65654	2.15166	0.531829	4.04576	5.21528e-05	0.0117064
Midbrain	ENSG00000141574	SECTM1	17	protein_coding	80278900	80291874	9.59732	2.37874	0.605352	3.92952	8.5117e-05	0.0172161
Midbrain	ENSG00000142089	IFITM3	11	protein_coding	319669	321050	720.37	0.620129	0.17706	3.50237	0.00046113	0.056209
Midbrain	ENSG00000142627	EPHA2	1	protein_coding	16450832	16482582	31.6658	0.99689	0.26577	3.75094	0.000176171	0.0277146
Midbrain	ENSG00000142694	EVA1B	1	protein_coding	36787632	36789755	10.0732	0.716958	0.206619	3.46996	0.000520539	0.0591422
Midbrain	ENSG00000142733	MAP3K6	1	protein_coding	27681675	27682962	62.6631	0.626761	0.130637	4.79774	1.60464e-06	0.000952741
Midbrain	ENSG00000143546	S100A8	1	protein_coding	153362508	153363452	24.9185	2.54078	0.5592	4.5436	5.53022e-06	0.0026251
Midbrain	ENSG00000144655	CSRNP1	3	protein_coding	39183346	39195066	137.454	1.17867	0.253932	4.64165	3.45639e-06	0.00181767
Midbrain	ENSG00000144837	PLA1A	3	protein_coding	119316689	119348658	24.0685	1.3949	0.27964	4.98822	6.0939e-07	0.000509838
Midbrain	ENSG00000144857	BOC	3	protein_coding	112929850	112969558	102.684	0.569101	0.174097	3.26887	0.00107977	0.0907503
Midbrain	ENSG00000145623	OSMR	5	protein_coding	38845960	38886759	81.5261	1.06788	0.260257	4.1032	4.07478e-05	0.0106448
Midbrain	ENSG00000149573	MPZL2	11	protein_coding	118124118	118134997	13.3626	1.93416	0.469878	4.1163	3.85011e-05	0.0104213
Midbrain	ENSG00000149591	TAGLN	11	protein_coding	117070037	117075273	219.191	0.567983	0.146946	3.86525	0.000110977	0.0208433
Midbrain	ENSG00000149596	JPH2	20	protein_coding	42740335	42816218	31.6716	1.11533	0.278989	3.99774	6.39492e-05	0.0138476
Midbrain	ENSG00000151929	BAG3	10	protein_coding	121410882	121437331	476.077	0.893607	0.208732	4.28112	1.85953e-05	0.00644746
Midbrain	ENSG00000152049	KCNE4	2	protein_coding	223916532	223920355	36.6036	1.04458	0.280047	3.73002	0.000191465	0.0293675
Midbrain	ENSG00000154734	ADAMTS1	21	protein_coding	28208066	28217728	172.99	0.95354	0.289086	3.29846	0.000972163	0.0848039
Midbrain	ENSG00000155090	KLF10	8	protein_coding	103661007	103668130	34.7994	0.904796	0.2181	4.14855	3.34593e-05	0.00986959
Midbrain	ENSG00000158055	GRHL3	1	protein_coding	24645812	24681808	13.395	1.96028	0.477302	4.10699	4.0085e-05	0.0106448
Midbrain	ENSG00000158769	F11R	1	protein_coding	160965001	160991138	49.5287	0.691208	0.167828	4.11855	3.81262e-05	0.0104213
Midbrain	ENSG00000159388	BTG2	1	protein_coding	203274619	203278697	383.125	0.782602	0.213304	3.66896	0.000243543	0.0347492
Midbrain	ENSG00000159403	C1R	12	protein_coding	7187513	7189410	78.4946	0.755586	0.18739	4.03215	5.52691e-05	0.0122522
Midbrain	ENSG00000160691	SHC1	1	protein_coding	154934774	154943217	180.707	0.51413	0.151767	3.38763	0.000704998	0.0712978
Midbrain	ENSG00000163220	S100A9	1	protein_coding	153330330	153333503	58.1995	2.05595	0.508153	4.04593	5.21158e-05	0.0117064
Midbrain	ENSG00000163638	ADAMTS9	3	protein_coding	64501333	64508187	91.8058	2.28569	0.443482	5.15398	2.5502e-07	0.000335278
Midbrain	ENSG00000163659	TIPARP	3	protein_coding	156391024	156422928	172.522	0.808936	0.21342	3.79035	0.000150436	0.025172
Midbrain	ENSG00000163739	CXCL1	4	protein_coding	74735110	74735894	4.45198	2.18264	0.611891	3.56705	0.000361026	0.0455141
Midbrain	ENSG00000163874	ZC3H12A	1	protein_coding	37940153	37949980	11.2496	1.56329	0.319304	4.89592	9.78493e-07	0.000741671
Midbrain	ENSG00000164674	SYTL3	6	protein_coding	159071085	159084080	17.7807	0.678339	0.204053	3.32432	0.000886342	0.0822353
Midbrain	ENSG00000165030	NFIL3	9	protein_coding	94171327	94186144	59.5866	1.06108	0.263332	4.02941	5.59159e-05	0.0122522
Midbrain	ENSG00000165507	C10orf10	10	protein_coding	45466429	45474238	462.067	1.88653	0.363816	5.18539	2.1556e-07	0.000311906
Midbrain	ENSG00000166592	RRAD	16	protein_coding	66955588	66959547	42.1144	1.08644	0.326648	3.32602	0.000880942	0.0822353
Midbrain	ENSG00000166741	NNMT	11	protein_coding	114128509	114141239	8.39323	2.16358	0.385049	5.61897	1.92097e-08	7.69181e-05
Midbrain	ENSG00000167470	MIDN	19	protein_coding	1248552	1251900	228.506	0.857697	0.201029	4.26652	1.98542e-05	0.00652565
Midbrain	ENSG00000167772	ANGPTL4	19	protein_coding	8428173	8429493	315.107	1.75667	0.396591	4.42944	9.44792e-06	0.0037804
Midbrain	ENSG00000168062	BATF2	11	protein_coding	64755415	64764517	11.8048	0.892982	0.269005	3.31958	0.000901542	0.0822353
Midbrain	ENSG00000168140	VASN	16	protein_coding	4421849	4433529	54.936	1.08583	0.25885	4.19485	2.73056e-05	0.00837644
Midbrain	ENSG00000168874	ATOH8	2	protein_coding	85978467	86015189	58.0765	0.62387	0.187872	3.32071	0.000897885	0.0822353
Midbrain	ENSG00000169242	EFNA1	1	protein_coding	155099936	155107333	130.873	0.755581	0.201415	3.75137	0.000175872	0.0277146
Midbrain	ENSG00000169248	CXCL11	4	protein_coding	76954835	76957350	8.72932	3.03064	0.83111	3.6465	0.000265837	0.0368896
Midbrain	ENSG00000169908	TM4SF1	3	protein_coding	149086809	149095652	180.745	1.23937	0.2902	4.27075	1.94815e-05	0.00651956
Midbrain	ENSG00000169991	IFFO2	1	protein_coding	19230775	19283180	214.94	0.634734	0.17276	3.67407	0.000238717	0.0343267
Midbrain	ENSG00000170379	FAM115C	7	protein_coding	143318043	143422176	15.2396	0.995692	0.284163	3.50394	0.000458423	0.056209
Midbrain	ENSG00000170425	ADORA2B	17	protein_coding	15848231	15879060	9.96812	0.942303	0.244893	3.84781	0.000119177	0.0219357
Midbrain	ENSG00000171051	FPR1	19	protein_coding	52248425	52255146	68.8558	1.45887	0.451135	3.23377	0.00122168	0.097766
Midbrain	ENSG00000171236	LRG1	19	protein_coding	4536421	4540486	4.26214	2.07042	0.639561	3.23725	0.00120688	0.0970037
Midbrain	ENSG00000171621	SPSB1	1	protein_coding	9352939	9429591	132.296	0.731594	0.176443	4.14635	3.37816e-05	0.00986959
Midbrain	ENSG00000172183	ISG20	15	protein_coding	89179384	89198852	31.9452	1.18903	0.261557	4.54596	5.46848e-06	0.0026251
Midbrain	ENSG00000172216	CEBPB	20	protein_coding	48807376	48809212	62.1577	0.832412	0.205299	4.05463	5.02139e-05	0.011553
Midbrain	ENSG00000172602	RND1	12	protein_coding	49250928	49254914	225.187	0.691302	0.211	3.27631	0.00105174	0.0892087
Midbrain	ENSG00000173530	TNFRSF10D	8	protein_coding	22993101	23021543	15.6236	1.31438	0.316347	4.15488	3.25455e-05	0.00982019
Midbrain	ENSG00000174576	NPAS4	11	protein_coding	66188475	66194178	8.82455	2.07217	0.571295	3.62714	0.000286578	0.0382229
Midbrain	ENSG00000174837	EMR1	19	protein_coding	6887577	6940470	3.074	2.12771	0.639693	3.32613	0.000880594	0.0822353
Midbrain	ENSG00000175592	FOSL1	11	protein_coding	65659520	65667890	5.57338	2.97932	0.583299	5.10771	3.2609e-07	0.000375126
Midbrain	ENSG00000175793	SFN	1	protein_coding	27189633	27190947	3.6664	2.34156	0.639671	3.66056	0.00025166	0.0356312
Midbrain	ENSG00000176046	NUPR1	16	protein_coding	28548606	28550495	306.312	0.539307	0.166969	3.22999	0.00123794	0.0986388
Midbrain	ENSG00000177464	GPR4	19	protein_coding	46093022	46105466	33.7326	1.59182	0.283366	5.61755	1.93685e-08	7.69181e-05
Midbrain	ENSG00000178726	THBD	20	protein_coding	23026270	23030378	32.9897	1.02537	0.27023	3.79445	0.000147973	0.0250123
Midbrain	ENSG00000179094	PER1	17	protein_coding	8043790	8055753	276.243	0.955539	0.233423	4.09359	4.24749e-05	0.0106448
Midbrain	ENSG00000180914	OXTR	3	protein_coding	8792094	8811303	69.2764	0.883093	0.267474	3.3016	0.000961337	0.0843057
Midbrain	ENSG00000182118	FAM89A	1	protein_coding	231154704	231175992	88.5458	0.506583	0.145755	3.47558	0.000509742	0.0583648
Midbrain	ENSG00000182511	FES	15	protein_coding	91426925	91428402	52.1252	0.668359	0.17537	3.81114	0.000138329	0.0244815
Midbrain	ENSG00000184307	ZDHHC23	3	protein_coding	113666748	113681829	29.9048	-0.534604	0.153265	-3.4881	0.000486465	0.0573967
Midbrain	ENSG00000184557	SOCS3	17	protein_coding	76352864	76356158	245.537	4.01538	0.562882	7.13362	9.77636e-13	1.79944e-08
Midbrain	ENSG00000185022	MAFF	22	protein_coding	38597889	38612518	87.6165	2.25995	0.403244	5.60442	2.08948e-08	7.69181e-05
Midbrain	ENSG00000185201	IFITM2	11	protein_coding	307631	309230	121.139	0.892543	0.21017	4.24678	2.16869e-05	0.00676558
Midbrain	ENSG00000185507	IRF7	11	protein_coding	612553	615626	36.1498	0.658063	0.173129	3.80099	0.000144121	0.0250123
Midbrain	ENSG00000185885	IFITM1	11	protein_coding	313506	315272	87.9966	0.605495	0.170401	3.55335	0.000380365	0.0476259
Midbrain	ENSG00000186185	KIF18B	17	protein_coding	43002077	43025005	6.46971	0.853552	0.263569	3.23844	0.00120184	0.0970037
Midbrain	ENSG00000187479	C11orf96	11	protein_coding	43964055	43965888	107.633	1.89523	0.387558	4.89019	1.00738e-06	0.000741671
Midbrain	ENSG00000187498	COL4A1	13	protein_coding	110801318	110959496	84.2711	1.38035	0.319084	4.32599	1.51851e-05	0.00537494
Midbrain	ENSG00000187823	ZCCHC16	X	protein_coding	111697727	111700473	4.71071	-0.93812	0.288944	-3.24673	0.00116741	0.0959255
Midbrain	ENSG00000187840	EIF4EBP1	8	protein_coding	37887859	37917883	19.1867	0.810249	0.198115	4.0898	4.31751e-05	0.0106448
Midbrain	ENSG00000188313	PLSCR1	3	protein_coding	146232967	146262651	80.7478	0.765309	0.203402	3.76253	0.000168201	0.0271571
Midbrain	ENSG00000196136	SERPINA3	14	protein_coding	95078721	95080194	20.0558	3.61061	0.683416	5.28318	1.2696e-07	0.000212438
Midbrain	ENSG00000196169	KIF19	17	protein_coding	72322349	72348465	90.7844	0.946995	0.243519	3.8888	0.000100743	0.0194951
Midbrain	ENSG00000196843	ARID5A	2	protein_coding	97202480	97216022	121.32	1.49269	0.295818	5.04599	4.5117e-07	0.000437065
Midbrain	ENSG00000196924	FLNA	X	protein_coding	153576892	153599571	677.279	0.566865	0.138499	4.09293	4.25957e-05	0.0106448
Midbrain	ENSG00000197019	SERTAD1	19	protein_coding	40927499	40931932	45.2443	0.726251	0.210832	3.44469	0.000571722	0.0626376
Midbrain	ENSG00000197142	ACSL5	10	protein_coding	114133776	114188134	74.2841	0.741459	0.195354	3.79547	0.000147364	0.0250123
Midbrain	ENSG00000198467	TPM2	9	protein_coding	35681989	35689900	82.9859	0.587306	0.144822	4.05536	5.00578e-05	0.011553
Midbrain	ENSG00000198576	ARC	8	protein_coding	143692405	143696833	31.3951	1.50078	0.376566	3.98543	6.73576e-05	0.014362
Midbrain	ENSG00000198805	PNP	14	protein_coding	20937113	20942730	94.6972	0.691449	0.190128	3.63675	0.000276098	0.0373666
Midbrain	ENSG00000198959	TGM2	20	protein_coding	36756863	36762162	390.887	0.666801	0.193253	3.45041	0.00055974	0.0620637
Midbrain	ENSG00000200087	SNORA73B	1	snoRNA	28835071	28835274	7.43154	0.784019	0.233817	3.35314	0.000799009	0.078899
Midbrain	ENSG00000205362	MT1A	16	protein_coding	56672578	56673999	15.6074	3.23758	0.630092	5.13826	2.77294e-07	0.000340259
Midbrain	ENSG00000205364	MT1M	16	protein_coding	56666145	56667898	259.366	1.0715	0.291058	3.6814	0.000231952	0.0336166
Midbrain	ENSG00000213937	CLDN9	16	protein_coding	3062457	3064506	6.39833	0.845944	0.255666	3.30879	0.000937008	0.0835249
Midbrain	ENSG00000221869	CEBPD	8	protein_coding	48649471	48651648	65.4304	1.23331	0.317533	3.88403	0.00010274	0.0194951
Midbrain	ENSG00000221963	APOL6	22	protein_coding	36044442	36064456	113.689	0.645851	0.194531	3.32004	0.000900041	0.0822353
Midbrain	ENSG00000228440	MTND5P6	7	pseudogene	57238681	57240478	15.9172	0.704384	0.185155	3.8043	0.000142208	0.0249284
Midbrain	ENSG00000233297	RASA4DP	7	pseudogene	102322283	102330916	7.6336	0.880916	0.271777	3.24132	0.00118976	0.0970037
Midbrain	ENSG00000235750	KIAA0040	1	protein_coding	175126123	175161929	71.1806	1.53866	0.372365	4.13213	3.59411e-05	0.0100232
Midbrain	ENSG00000247095	MIR210HG	11	lincRNA	565660	568420	21.7142	1.16314	0.30174	3.85476	0.000115845	0.0215377
Midbrain	ENSG00000249087	C1orf213	1	protein_coding	23695490	23698276	32.4079	0.514616	0.140901	3.65232	0.000259884	0.0365147
Midbrain	ENSG00000250786	SNHG18	5	lincRNA	9546312	9550721	21.4847	0.734817	0.220648	3.33027	0.000867627	0.0818951
Midbrain	ENSG00000251544	MTND5P12	5	pseudogene	93903166	93904614	161.463	0.546888	0.138328	3.95357	7.69944e-05	0.0159231
Midbrain	ENSG00000260549	MT1L	16	pseudogene	56651388	56652730	20.8038	0.994462	0.250043	3.97716	6.9743e-05	0.0145874
Midbrain	ENSG00000263429	LINC00675	17	lincRNA	10698230	10707416	4.73407	1.2907	0.376854	3.42494	0.000614925	0.0650478
